# Supplementary material for: Molecular dissection of condensin II-mediated chromosome assembly using in vitro assays
Source: eLife journal article supplement (doi:10.7554/elife.78984), 2022-08-19
Supplement: fig4-figsupp1-data1 [file elife-78984-fig4-figsupp1-data1-v2.zip]

Figure 4–figure supplement 1B–source data 1

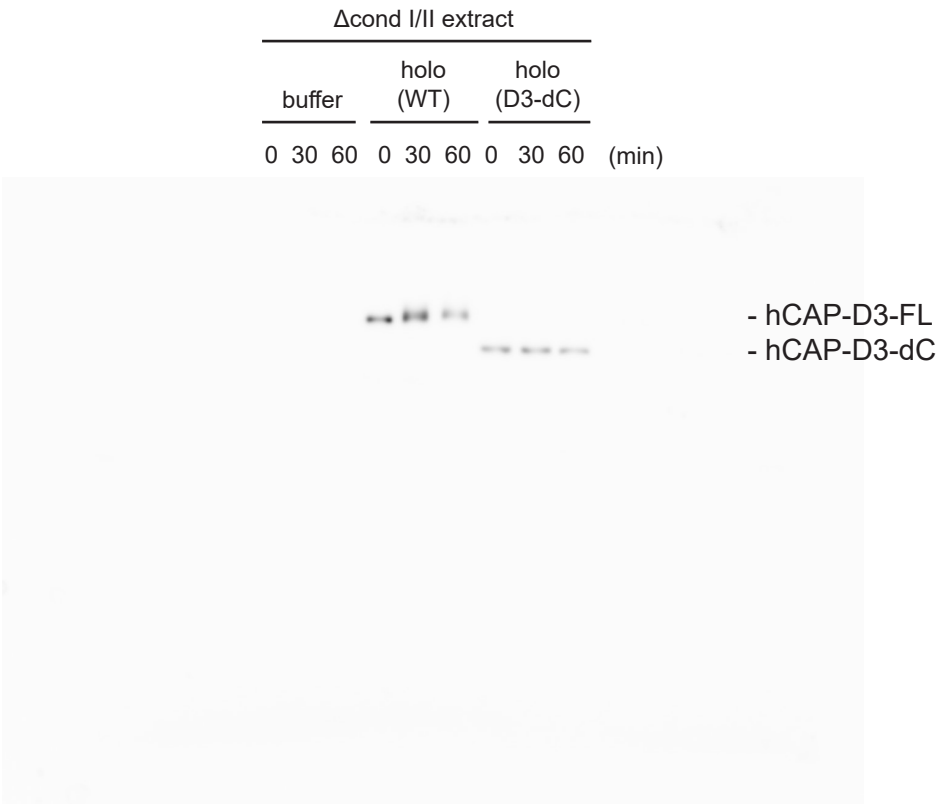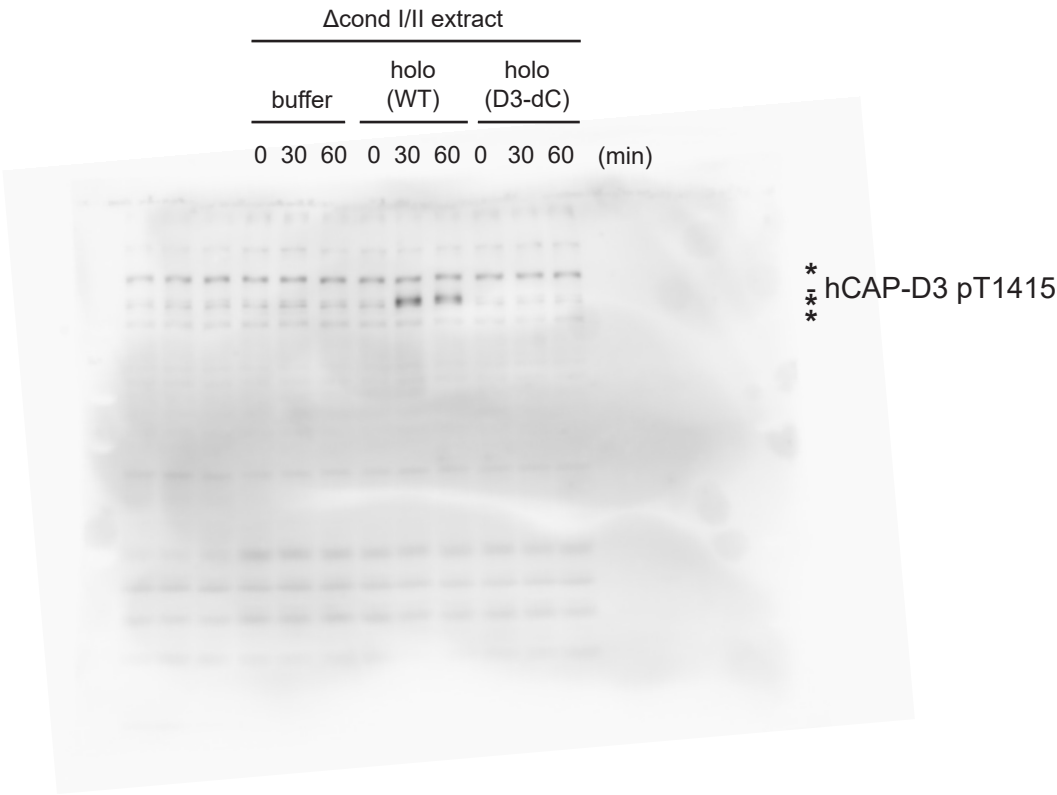

| $\Delta$ cond I/II extract |    |    |           |    |    |              |    |    |
|----------------------------|----|----|-----------|----|----|--------------|----|----|
| buffer                     |    |    | holo (WT) |    |    | holo (D3-dC) |    |    |
| 0                          | 30 | 60 | 0         | 30 | 60 | 0            | 30 | 60 |
| (min)                      |    |    |           |    |    |              |    |    |

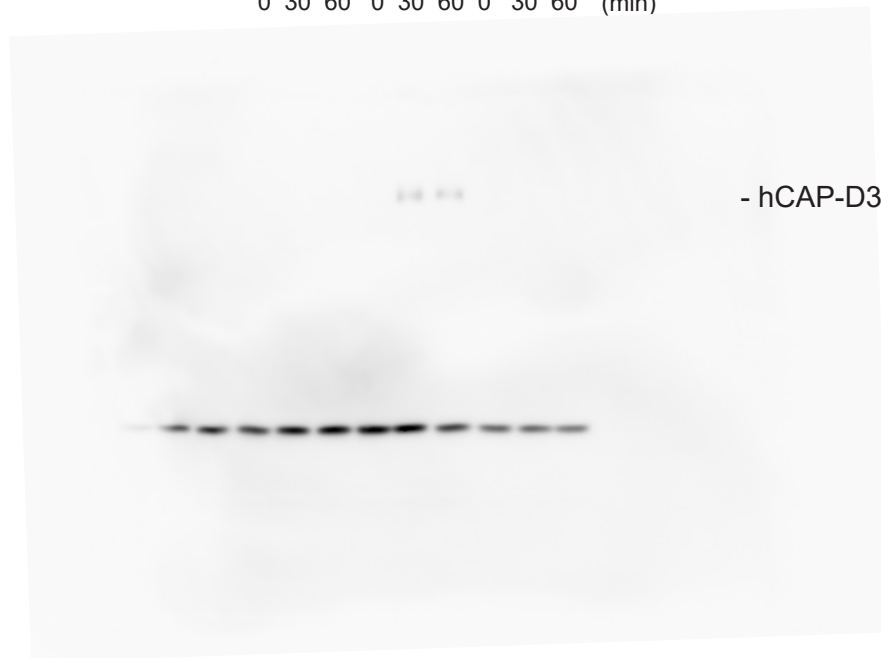

- hCAP-D3 pS1474

| $\Delta$ cond I/II extract |    |    |           |    |    |              |    |    |
|----------------------------|----|----|-----------|----|----|--------------|----|----|
| buffer                     |    |    | holo (WT) |    |    | holo (D3-dC) |    |    |
| 0                          | 30 | 60 | 0         | 30 | 60 | 0            | 30 | 60 |
| (min)                      |    |    |           |    |    |              |    |    |

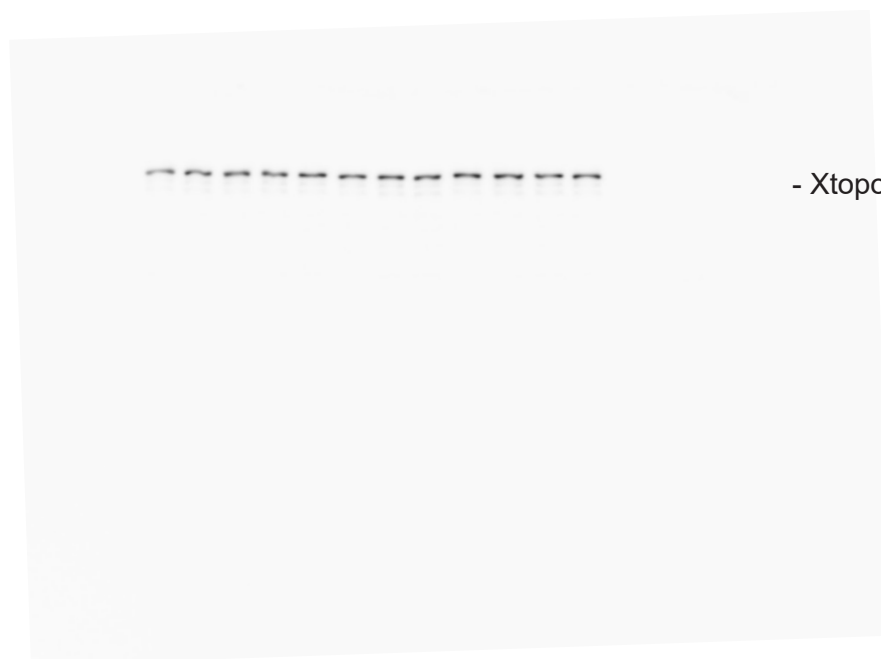

- Xtopo II $\alpha$
