# Supplementary material for: Molecular dissection of condensin II-mediated chromosome assembly using in vitro assays
Source: eLife. 2022 Aug 19;11:e78984. doi: 10.7554/eLife.78984 (PMC9433093; doi:10.7554/eLife.78984)
Supplement: Figure 1—source data 1. [file elife-78984-fig1-data1.xlsx]

## Sheet: Δmock
Figure 1-source data 1
Figure 1E
Non-normalized values
	Δmock
Chromosome sample		1	2	3	4	5	6	7	8	9	10	11	12	13	14	15	16	17	18	19	20
		DAPI	DAPI	DAPI	DAPI	DAPI	DAPI	DAPI	DAPI	DAPI	DAPI	DAPI	DAPI	DAPI	DAPI	DAPI	DAPI	DAPI	DAPI	DAPI	DAPI
Distance (µm)
-1.2987		0	0	178.226	125.498	0	66.488	0	81.452	0	0	7.413	207.125	0	57.201	175.537	28.121	113.095	0	0	0
-1.23377		9.372	10.607	149.384	195.538	4.845	41.256	135.856	81.652	56.598	14.643	34.954	199.273	43.592	53.628	184.819	78.579	94.935	85.903	6.585	27.167
-1.16883		7.206	55.849	197.054	262.882	14.193	67.747	176.154	172.309	52.282	39.662	55.802	216.636	63.331	52.039	240.815	122.014	148.378	81.116	33.681	46.798
-1.1039		27.071	139.51	251.012	280.584	18.77	127.27	144.513	205.536	62.76	64.397	95.318	305.636	62.283	90.514	266.505	209.555	187.173	95.48	66.64	40.652
-1.03896		66.566	197.344	325.006	363.34	89.069	89.734	111.802	285.878	72.427	69.985	129.54	366.395	161.642	117.692	286.931	236.961	238.479	123.092	102.7	131.051
-0.974026		97.885	271.186	378.826	465.809	171.384	221.182	219.638	335.819	172.424	94.396	112.025	346.461	222.015	181.24	321.921	378.248	308.862	190.629	143.774	219.308
-0.909091		76.329	350.872	450.998	592.098	203.664	332.835	321.696	341.421	276.499	220.623	160.455	402.26	314.552	153.915	373.456	507.343	398.365	199.211	216.007	350.789
-0.844156		84.589	530.037	508.515	712.953	338.743	516.896	404.268	395.831	301.214	361.929	249.933	489.446	411.192	252.154	561.649	860.3	506.962	278.301	309.654	606.553
-0.779221		178.47	603.393	612.923	889.045	533.899	757.997	549.363	613.828	505.264	425.326	353.857	623.693	484.927	320.314	760.953	1205.53	590.685	380.779	366.24	854.835
-0.714286		244.895	793.08	752.717	1224.78	795.197	1110.46	602.015	784.553	722.838	638.786	541.096	737.034	554.629	422.528	992.417	1601.5	758.277	524.479	530.546	1288.11
-0.649351		362.776	1067.4	940.766	1684.8	1299.87	1517.07	828.962	1161.46	967.637	914.353	754.694	967.969	753.208	643.628	1475.37	2121.85	1057.87	725.879	720.971	1783.24
-0.584416		499.688	1420.36	1213.56	2159.32	2021.11	2095.96	1221.06	1562.39	1395.05	1461.71	1075.56	1250.73	1016	834.28	2099.42	2788.77	1415.51	1063.33	962.258	2427.89
-0.519481		853.092	1831.42	1677.08	2755.82	2842.47	2683.01	1774.51	2257.7	2062.87	2157.1	1637.48	1628.99	1242.67	1208.09	2760.44	3667.07	1880.25	1444.21	1551.91	3128.89
-0.454545		1244.26	2407.38	2276.56	3447.12	4036.93	3484.92	2535.53	2983.44	2740.9	3094.91	2406.91	2191.46	1592.58	1745.89	3443.95	4559.29	2532.19	1868.14	2012.69	3744.94
-0.38961		1745.13	3366.94	3139.72	4324.33	5341.02	4162.52	3556.93	4244.65	3723.44	4126.69	3250.06	2902.03	2095.15	2453.34	4130.88	5353.05	3307.07	2464.98	2642.64	4595.78
-0.324675		2419.83	4398.18	4258.55	5223.57	6546.78	4735.85	4512.1	5423.62	4698.22	5193.88	4154.92	3848.02	2802.02	3243.64	4823.68	6108.93	4543.25	3031.6	3429.01	5276.79
-0.25974		2964.21	5413.99	5389.94	5734.34	7503.07	5373.26	5412.53	6377.78	5721.06	6077.49	5160.28	4930.46	3718.57	4208.7	5297.45	6997.46	5225.73	3769.57	4048.44	6086.48
-0.194805		3489.27	6237.18	6309.45	6427.4	8320.61	6088.44	6072.7	7560.5	6448.59	7049.65	6100.34	5613.85	4570.95	5043.35	5927.36	7510.19	6015.2	4601.09	4699.17	6553.06
-0.12987		3858.17	7336.78	7114.96	6674.09	9083.67	6396.35	6544.9	8257.02	7043.99	7707.02	6774.23	6014.68	5716.17	5694.22	5933.34	8193.28	6818.49	5438.76	5274.75	7164.08
-0.0649351		3894.79	7624.23	7468.67	6934.37	9228.87	6714.58	6921.53	8474.68	7689.48	8225.32	7393.06	6288.48	6412.63	6129.49	6019.57	8306.71	7216.57	6072.72	5450.69	7476.62
0		3950.8	7778.1	7749.7	6970.42	9239.47	7056.59	7019.61	8602.69	7921.04	8445.37	7477.3	6473.95	6504.7	6248.24	6040.71	8349.61	7333.12	6415.42	5583.64	7544.6
0.0649351		3750.13	7619.98	7630.44	6601.69	8786.47	6926.41	6938.67	8326.71	7779.61	7971.98	7282.07	6271.8	6445.4	6090.52	5726.05	8209.95	7106.04	6360.55	5472.94	7509.93
0.12987		3396.99	6768.56	7188.12	6058.58	8193.36	6710.96	6607.7	7696.68	7535.69	7709.3	7052.28	5576.33	6251.46	5300.26	5157.24	8042.91	6639.54	6277.01	5177.54	7422.97
0.194805		2892.27	6477.68	6207.66	5509.18	7469.07	6414.45	6033.24	6837	6973.92	7157.45	6357.31	4746.99	5689.16	4233.9	4652.75	7620.35	6153.45	6072.63	4617.49	7086.59
0.25974		2452.95	5738.26	5121.88	4807.69	6257.36	6331.94	5437.03	5782.05	6280.97	6333.06	5498.4	3982.32	5003.44	3461.91	3996.81	7006.94	5540.24	5463.73	3963.33	6415.47
0.324675		1963.87	4792.85	3740.65	4072.48	5070.04	5904.77	4690.68	4688.5	5488.76	5582.43	4457.04	2960.93	4136.93	2806.32	3231.8	6241.87	4593.23	4914.44	3164.85	5715.93
0.38961		1485.26	3691.97	2574.45	3269.17	4035.74	5392.26	3872	3249.43	4400.67	4572.3	3280.09	2169.39	3180.29	2185.04	2606.12	5498.41	3605.25	4017.91	2328.28	4897.49
0.454545		1134.13	2730.21	1885.34	2340.02	2844.3	4789.85	2958.34	2278.47	3533.19	3783.38	2286.14	1529.31	2236.25	1675.46	1999.18	4683.19	2712.73	2872.69	1640.42	4000.89
0.519481		755.366	2206.49	1375.69	1571.64	2041.46	4213.93	2229.67	1600	2595.89	2996.42	1638.37	1065.11	1709.69	1314.37	1496.36	3997.08	1984.23	2230.87	1103.71	3313.37
0.584416		579.107	1551.11	978.34	1115.7	1495.25	3643.41	1699.13	1047.68	2038.79	2332.03	1174.76	863.949	1293.33	968.854	1049.01	3204.15	1434.02	1663.14	793.566	2604.29
0.649351		426.332	1180.11	811.462	757.608	1037.3	2967.6	1282.37	774.381	1562.34	1861.69	803.944	633.321	958.025	762.413	796.634	2476.51	1081.05	1215.01	550.516	2007.12
0.714286		327.916	868.575	579.11	476.39	797.707	2167.72	927.126	553.978	1262.93	1337.04	610.336	453.924	789.371	596.221	526.089	1839.52	831.541	932.709	386.508	1519.59
0.779221		274.173	692.075	472.75	282.919	699.992	1659.7	722.735	348.616	1078.08	980.194	404.856	331.279	610.17	463.015	363.581	1338.18	586.752	710.547	319.529	1215.66
0.844156		217.786	522.048	367.42	163.576	527.492	1185.59	684.808	288.524	798.25	725.079	362.485	274.228	473.154	328.338	250.489	939.242	345.825	591.697	248.078	1063.11
0.909091		162.69	473.708	282.85	217.071	432.545	714.727	584.171	209.18	651.581	506.415	319.31	177.29	441.187	242.412	202.221	631.337	224.614	439.23	144.117	857.323
0.974026		152.474	332.921	204.107	184.404	353.462	515.709	495.07	163.426	501.117	414.911	184.733	146.159	304.599	185.89	152.089	417.611	192.444	333.666	122.797	707.345
1.03896		159.747	215.045	125.179	122.288	260.213	328.253	377.08	159.507	404.35	300.378	85.944	147.664	233.944	125.64	93.755	280.411	161.071	238.603	72.621	634.556
1.1039		139.123	105.166	64.864	109.476	212.49	189.48	273.209	130.278	322.182	254.443	135.495	78.486	143.967	33.884	45.503	201.545	107.273	139.363	78.45	577.016
1.16883		146.344	130.529	38.979	33.924	199.924	112.592	274.889	103.25	308.987	192.545	84.707	98.294	61.761	95.324	72.026	118.812	68	108.985	49.564	497.162
1.23377		125.006	71.243	0	49.754	137.981	17.012	294.243	0	256.674	116.966	25.375	37.374	63.413	2.82	35.916	58.72	7.194	37.503	45.695	417.339
1.2987		90.276	52.558	2.872	0	132.526	0	232.646	33.38	166.437	108.974	0	0	94.6	0	0	0	0	8.515	11.556	381.199

## Sheet: Δcond I
Figure 1-source data 1
Figure 1E
Non-normalized values
	Δcond I
Chromosome sample		1	2	3	4	5	6	7	8	9	10	11	12	13	14	15	16	17	18	19	20
		DAPI	DAPI	DAPI	DAPI	DAPI	DAPI	DAPI	DAPI	DAPI	DAPI	DAPI	DAPI	DAPI	DAPI	DAPI	DAPI	DAPI	DAPI	DAPI	DAPI
Distance (µm)
-1.2987		192.095	0	0	0	132.019	0	216.241	211.76	0	0	0	292.471	0	0	94.195	0	30.967	0	0	406.776
-1.23377		276.217	46.383	123.136	96.801	225.91	104.276	367.963	190.16	33.369	102.896	93.099	424.019	74.257	25.182	184.727	74.224	255.329	64.944	120.184	459.723
-1.16883		359.666	142.175	83.595	234.511	375.739	101.408	514.156	185.76	74.818	154.594	168.852	614.627	219.918	103.573	320.545	154.655	378.559	87.971	264.509	448.625
-1.1039		474.339	245.015	208.354	348.856	602.366	269.329	910.795	418.24	292.053	259.179	295.743	758.485	425.947	236.194	368.742	341.571	388.291	113.023	476.948	519.752
-1.03896		588.905	336.542	313.077	508.838	823.9	282.224	1132.1	420.84	464.737	374.12	391.386	870.05	608.202	334.799	395.357	518.553	533.734	188.406	584.105	700.239
-0.974026		699.769	437.993	453.043	632.053	1026.03	380.803	1377.25	598.12	602.308	479.374	575.841	1084.68	662.689	470.065	538.413	725.489	710.208	254.585	794.658	763.671
-0.909091		862.063	548.879	501.766	758.454	1364.25	477.079	1502.97	848.56	749.995	662.204	809.277	1173.4	851.037	570.607	714.126	936.357	842.444	296.48	1102.19	859.841
-0.844156		964.936	735.471	592.334	887.303	1517.83	623.382	1607.86	1049.68	976.602	783.056	953.507	1254.06	1086.76	739.107	899.611	1170.11	1029.2	339.073	1125.49	1019.23
-0.779221		1139.33	872.015	673.271	975.062	1600.33	768.816	1634.74	1208.24	1279.31	946.373	1244.4	1547.28	1279.97	922.675	1073.35	1413.48	1284.97	422.765	1366.19	1169.03
-0.714286		1352.98	1076.47	801.514	1157.38	1684.92	964.803	1721.74	1463.12	1401.27	1150.24	1506.12	1814.27	1541.41	1090.19	1181.45	1701.26	1597.74	632.111	1680	1374.56
-0.649351		1574.28	1322.62	989.014	1308.27	1846.75	1100.1	1814.77	1817.64	1658.12	1442.93	1729.07	2214.95	1835.06	1324.17	1313.96	1763.06	1897.08	769.061	2083.55	1570.82
-0.584416		1863.39	1559.3	1190.87	1413.92	2145.9	1279.54	2021.65	2037.32	1849.47	1575.48	1860.37	2564.33	2202.09	1593.51	1518.76	2013.05	2182.58	905.338	2458.61	1759.02
-0.519481		2099.4	1747.56	1428.85	1703.27	2402.64	1496.64	2350.18	2236.92	2151.29	1884.46	2159.55	2884.32	2514.68	1838.21	1767.3	2357.74	2442.56	1016.45	2724.37	2153.12
-0.454545		2147.85	1963.37	1528.91	1980.02	2748.76	1552.54	2700.96	2618.64	2486.05	2082.89	2426.83	3159.15	2837.14	2161.8	2095.12	2734.88	2949.61	1105.05	3104.83	2309.43
-0.38961		2374.33	2150.7	1782.56	2217.92	3028.62	1969.46	2889.17	2880.96	2930.68	2374.33	2690.38	3406.52	3290.9	2476.93	2329.81	3148.19	3310.01	1326.89	3457.76	2737.77
-0.324675		2559.3	2454.36	2117.18	2656.51	3503.2	2310.07	3211.44	3068.48	3108.48	2628.87	3007.55	3516.52	3763.84	2702.27	2713.55	3726.31	3695.09	1416.15	3725.86	2932
-0.25974		2550.5	2678.49	2367.57	3032	3776.19	2689.99	3607.04	3401.8	3267.26	2874.85	3282.68	3671.28	4114.92	2949.59	3011.62	4117.29	4164.56	1633.92	3866.81	3096.31
-0.194805		2654.34	2965.71	2604.66	3393.08	4066.5	2977.8	3844.15	3745.32	3671.39	3015.23	3675.23	3593.11	4507.15	3237.89	3227.96	4485.9	4383.47	1901.43	3876.22	3392.99
-0.12987		2793.58	3111.25	2844.51	3906.25	4376.67	3437.28	4138.09	3945.44	3939.78	3248.71	3971.25	3813.21	4828.95	3408.41	3444.22	4831.2	4564.78	2284.16	3891.78	3828.08
-0.0649351		2789.24	3341.1	3043.96	4296.23	4504	3696.54	4223.35	4116.56	3966.84	3322.37	4170.73	3970.34	5156	3702.6	3621.91	4866.81	5076.84	2378.26	3993.1	4117.58
0		2804.34	3465.96	3199.25	4375.33	4665.41	3867.1	4460.6	4231.68	4093.02	3358.71	4217.52	4143.7	5162.27	3852.97	3674.78	4926.5	5121.3	2445.67	4001.24	4216.56
0.0649351		2489.11	3216.8	3183.13	4211.51	4641.67	3858.96	4285.72	4032.08	3928.65	3291	4163.34	4021.61	5049.5	3667.92	3569.08	4717.61	5028.62	2327.33	3877.47	4094.26
0.12987		2345.14	3122.89	3031.48	4082.43	4496.78	3785.58	4088.14	3925.16	3872.52	3042.4	4054.19	3940.68	4906.97	3406.77	3475.1	4478.53	4957.6	2290.64	3784.69	3750.45
0.194805		2114.75	2824.51	2772.4	3907.76	4271.07	3473.12	3766.38	3490.84	3477.75	2805.94	3734.96	3536.51	4471.89	3252.85	3480.14	4194.23	4515.86	2227.26	3727.48	3560.64
0.25974		1865.06	2507.65	2586.34	3624.73	3894.54	3034.85	3407.86	3243.32	3148.66	2696.8	3384.4	3225.28	4449.2	3124.31	3232.39	3670.26	4343.5	2059.24	3456.61	3367.84
0.324675		1648.28	2231.28	2438.39	3261.2	3386.13	2870.7	2997.93	2831.88	2952.38	2325.99	2994.08	2928.81	4019.42	2840.66	2782.89	3186.23	3941.34	1940.67	3091.9	3120.69
0.38961		1515.35	2061.35	2334.36	2923.02	3001.55	2592.58	2663.77	2505.48	2651.51	1960.15	2619.24	2661.44	3464.44	2612.77	2619.64	2854.09	3521.2	1719.93	2657.4	2804.58
0.454545		1397.36	1856.6	2116.06	2610.45	2800.73	2296.91	2458.55	2165.12	2504.88	1710.17	2412.94	2473.08	3042.89	2524.07	2250.42	2621.65	3101.25	1671.82	2293.62	2682.59
0.519481		1162.01	1662.26	1973.34	2339.66	2515.75	1861.85	2044.38	2026.44	2180.25	1525.11	2259.61	2088.77	2700.19	2233.28	1993.84	2408.57	2699.26	1512.58	2148.46	2470.3
0.584416		1044.95	1511.91	1754.11	2004.09	2153.4	1642.8	1929.38	1754.2	1929.44	1390.52	2122.94	1784.29	2374.26	2080.47	1975.65	2267.15	2419.06	1353.07	1915.77	2356.8
0.649351		925.667	1386.7	1612.55	1696.3	1778.72	1385.67	1621.72	1634.32	1669.38	1264.67	1911.24	1622.23	2095.45	1824.68	1832.29	1940.25	2103.67	1199.06	1706.61	2097.38
0.714286		749.394	1121.84	1461.9	1382.36	1512.5	1218.96	1392.26	1309.52	1484.91	1122.16	1771.95	1362.25	1738.22	1560.37	1626.57	1763.89	1935.35	1136.37	1616.33	1863.22
0.779221		543.265	926.226	1310.82	1253.9	1265.65	1183.57	1182.51	1079.88	1277.27	967.208	1442	1200.1	1399.62	1288.28	1563.77	1665.08	1527.79	1030.76	1454.51	1476.72
0.844156		475.853	686.995	1035.63	1126.92	932.736	1010.33	1034.71	911.44	1043.2	835.531	1314.56	1017.63	1180.38	1132.52	1491.33	1460.55	1290.35	945.038	1315.76	1117.76
0.909091		290.837	553.674	844.401	950.198	823.494	813.421	835.745	658.88	947.74	714.003	1152.46	845.536	1051.44	1003.26	1282.14	1281.14	1088.88	918.015	1145.85	844.086
0.974026		253.779	388.427	627.491	771.34	676.775	566.54	602.999	524.2	825.269	580.444	960.927	726.847	757.805	893.09	1121.87	1054.93	764.049	790.995	1007.37	554.192
1.03896		145.12	298.081	399.466	672.773	461.693	341.329	540.371	506.28	711.386	461.153	835.192	565.795	610.193	810.407	943.345	864.176	552.593	731.225	845.694	411.642
1.1039		94.18	237.687	218.624	515.72	292.179	202.329	401.416	258.64	626.582	454.92	641.359	364.366	504.702	680.592	602.265	712.424	379.889	670.287	679.909	297.984
1.16883		53.601	154.466	170.236	371.738	197.219	156.724	273.866	222.84	416.822	265.247	419.975	263.159	347.347	461.321	435.434	661.395	312.867	566.194	544.517	195.952
1.23377		3.274	79.996	79.163	166.196	96.886	92.224	81.713	107.08	362.923	148.801	312.376	103.118	197.821	249.493	298.94	592.999	175.516	450.437	402.227	101.315
1.2987		0	67.585	2.419	68.398	0	55.855	0	0	232.858	66.959	208.535	0	122.419	121.194	0	467.266	0	358.381	228.435	0

## Sheet: Δcond I&2+holo(WT)
Figure 1-source data 1
Figure 1E
Non-normalized values
	Δcond I/II + holo(WT)
Chromosome sample		1	2	3	4	5	6	7	8	9	10	11	12	13	14	15	16	17	18	19	20
		DAPI	DAPI	DAPI	DAPI	DAPI	DAPI	DAPI	DAPI	DAPI	DAPI	DAPI	DAPI	DAPI	DAPI	DAPI	DAPI	DAPI	DAPI	DAPI	DAPI
Distance (µm)
-1.2987		581.566	710.569	0	514.044	0	38.358	0	0	0	581.598	1009.7	388.841	14.522	86.14	0	0	111.231	0	940.565	110.956
-1.23377		968.032	881.446	145.225	728.32	90.328	173.49	165.647	213.76	78.137	621.271	1229.67	573.879	0	170.865	110.636	77.5	401.206	243.82	1043.79	150.355
-1.16883		1148.82	951.034	265.339	876.25	252.537	282.551	243.429	235.777	129.654	699.737	1428.62	808.907	186.031	255.404	179.745	195.5	630.559	481.329	1146.14	270.206
-1.1039		1209.85	899.494	373.895	1105.48	393.006	361.015	379.118	368.425	161.503	811.868	1701.67	881.322	286.058	367.693	256.716	220	978.961	720.875	1214.37	412.582
-1.03896		1284	1092.76	510.064	1310.9	551.71	436.5	406.856	488.573	185.668	924.284	2168.9	1006.65	378.683	527.278	277.497	336	1134.16	1064.22	1248.26	525.19
-0.974026		1499.55	1159.4	701.696	1694.44	710.056	357.512	455.285	674.545	227.967	1038.04	2453.34	1181.44	595.155	628.979	592.034	626	1509.66	1361.17	1416.3	666.891
-0.909091		1630.98	1170.38	1031.37	2013.9	851.076	611.916	586.075	955.592	310.656	1187.26	2885.64	1391.1	897.981	738.5	777.397	811	1799.62	1561.79	1393.07	894.755
-0.844156		1969.08	1391.39	1299.99	2342.97	1087.05	851.838	773.372	1251.61	343.186	1285.88	3056.74	1522.3	1154.88	897.265	1149.03	1177.5	2192.25	1596.85	1511.45	1076.43
-0.779221		2506.67	1610.89	1466.77	2588.81	1290.26	1237.43	1149.47	1668.68	425.631	1504.72	3261.95	1884.62	1537.71	1073.08	1338.93	1341.5	2588.49	1713.48	1616.68	1296.23
-0.714286		2836.99	1857.61	2088.04	2680.78	1571.26	1600.99	1388.09	1893.17	587.106	1697.49	3351.28	2200.59	1948.31	1495.85	1517.92	1716	2902.71	1868.02	1918.75	1455.44
-0.649351		3114.34	2035.59	2614.81	2949.45	1980.53	2094.95	1484.16	2062.36	861.044	1823.82	3499.64	2506.83	2242.69	1715.83	1953.87	1764.5	3039.3	1979.36	2129.65	1502.58
-0.584416		3408.01	2405.93	2926.34	3448.01	2400.69	2363.12	1574.68	2191.21	1176.02	1984.55	3891.02	2860.64	2680.06	2019.74	2162.25	2083	3368.96	2143.3	2326.44	1658.61
-0.519481		3700.01	2602.37	3289.81	3705.66	2707.86	2568.92	1751.31	2473.47	1501.71	2235.44	4203.33	3076.49	3194.09	2251.8	2597.37	2326	3824.66	2495.41	2400.55	1785.13
-0.454545		4084.35	2841.52	3612.27	4090.92	3011.01	2958.88	1960.83	2696.3	1832.55	2333.07	4597.41	3665.31	3611.88	2541.31	2900.14	2582.5	3917.7	2745.37	2540.93	1906.63
-0.38961		4546.17	2994.75	3962.28	4525.2	3080.54	3144.92	2275.26	3047.16	2209.25	2663.06	5152.23	3880.52	4082.07	2490.93	3259.19	2922	4192.57	2903.03	2766.36	1969.72
-0.324675		4920.69	3357.22	4556.63	4631.21	3327.28	3501.23	2753.89	3448.19	2693.68	2954.01	5697.19	4200.79	4650.6	2935.52	3564.87	3178	4326.96	3208.52	2939.55	2133.35
-0.25974		5249.6	3896.84	5126.99	4773.24	3664.91	3909.03	3062.64	3879.45	3143.65	3205.06	5838.55	4424.97	5029.92	3270.51	3734.98	3504	4560.09	3565.24	3333.65	2489.01
-0.194805		6084.78	4344.82	5555.43	5070.63	3773.68	4489.12	3464.97	4303.34	3466.71	3557.7	6120.98	4631.68	5313.08	3400.47	4173.7	4083	4856.99	3856.82	3649.88	2842.53
-0.12987		6163.16	4718.78	6009.79	5128.83	4259.53	4965.41	3731.76	4482.96	3855.32	3743.13	6140.22	4811.01	5677.04	3866.2	4365.87	4543.5	4869.07	4127.51	3881.1	2986.66
-0.0649351		6316.59	5114.43	6464.86	5444.6	4494.54	5425.37	3920.99	4817.96	4108.25	3969.03	6303.94	4938.17	6022.91	4330.81	4538.3	4803	5136.65	4063.88	4398.29	3258.9
0		6376.41	5159.08	6698.01	5551.93	4562.53	5548.71	4058.12	4955.16	4190.01	4080.91	6451.1	4985.94	6207.95	4428.35	4581.02	4875	5277.56	4352.09	4801.68	3471.24
0.0649351		5880.59	5156.44	6676.79	5488.91	4478.54	5524.26	3806.77	4885.92	3984.41	4076.81	5935.86	4869.38	6104.73	4158.81	4426.5	4676	5117.45	4314.29	4760.49	3362.76
0.12987		5419.74	4834.53	6555	5143.82	4177.85	5215.4	3634.18	4751.48	3696.06	3605.97	5308.35	4730.39	5876.13	3922.63	4297.37	4330	4656.58	4196.31	4545.65	3098.33
0.194805		4911.35	4492.34	6251.65	4721.41	3870.7	4769.44	3210.51	4450.68	3451.58	3373.58	4699.32	4481.95	5648.44	3601.46	4031.5	3903.5	4408.73	3785.6	4168.46	2651.71
0.25974		4506.8	4091.61	5927.04	4480.49	3490.07	4406.63	2760.41	4182.9	3021	3276.98	4265.56	4482.88	5494.37	3114.31	3608.32	3659.5	3922.77	3538.28	3808.93	2414.21
0.324675		3941.95	3761.41	5651.67	3835.55	2991.61	4147.21	2452.62	3951.8	2493.29	2838.84	3917.63	4103.03	5264.01	2702.6	3290.55	3176.5	3725.99	3283.88	3591.61	2128.9
0.38961		3659.75	3250.98	5419.7	3720.87	2601.77	3737.57	2350.87	3672.4	2235.26	2579.68	3480.8	3899.84	4817.17	2289.56	3027.45	2886.5	3416.41	2975.42	3405.35	1740.83
0.454545		3180.92	2977.96	5070.12	3357.14	2448.18	3344.78	2123.91	3288.62	1826.12	2473.85	3046.35	3587.16	4746.48	2040.12	2693.08	2593.5	3269.3	2798.8	3084.59	1564.05
0.519481		2837.14	2852.43	4673.32	2886.52	2228.38	2962.91	1963.71	2905.53	1607.75	2217.82	2747.3	3246.25	4349.58	1886.09	2401.44	2328.5	3001.25	2581.51	2866.22	1382.74
0.584416		2354.4	2683.92	4227.96	2626.01	2057.25	2447.81	1823.47	2316.06	1551.22	1902.36	2546.98	2765.48	4056.63	1853.82	2200.23	2277.5	2807.09	2266.65	2704.25	1136.86
0.649351		2200.18	2504.62	3856.31	2328.87	2068.77	2224.62	1559.39	2171.07	1271.54	1734.23	2476	2225.88	3781.75	1789.56	2066.21	2308.5	2560.01	1970.82	2458.39	971.529
0.714286		1919	2127.71	3391.01	2081.74	1946.88	1914.01	1405.07	1921.18	1055.37	1673.47	2281.41	1892.14	3445.58	1471.77	1888.39	2188	2249.31	1812.06	2295.5	740.928
0.779221		1740.21	1674.22	3053.54	1958.07	1713.09	1456.46	1197.82	1645.31	679.17	1464.93	1911.98	1658.54	3126.41	1185.71	1604.96	1926	1800.45	1685.2	2062.67	578.371
0.844156		1455.04	1384.02	2398.5	1771.67	1535.29	1127.29	1072.26	1337.99	658.594	1239.4	1717.02	1351.38	2793.46	918.444	1314.89	1810.5	1393.92	1741.13	1848.76	473.131
0.909091		1231.91	1044.07	1916.01	1518.72	1265.7	929.12	912.589	1313.97	501.42	959.359	1486.08	1099.3	2472.68	722.506	1076.76	1458	1301.02	1589	1687.3	364.327
0.974026		952.577	863.544	1477.22	1236.4	1024.27	699.06	699.018	1383.12	384.335	713.024	1223.15	783.753	2108.54	585.253	888.776	1187	1189.33	1556.35	1285.54	241.195
1.03896		762.985	726.874	1225.64	852.142	908.269	508.036	671.659	1368.36	324.898	451.664	821.691	605.224	1869.47	458.353	680.667	927.5	723.298	1464.96	953.014	160.143
1.1039		582.933	465.842	949.368	497.058	830.156	307.094	537.455	1145.87	215.03	241.108	494.811	413.217	1679.84	413	385.138	705.5	431.58	1180.38	604.673	108.321
1.16883		445.188	258.483	857.842	379.286	719.871	151.545	391.545	953.96	63.526	107.134	235.809	286.12	1443.45	292.036	254.329	507	360.855	956.138	358.101	56.885
1.23377		186.353	170.484	796.916	166.617	507.511	30.489	226.978	742.818	6.916	63.536	87.626	118.085	1334.25	135.303	97.299	434.5	134.851	741.227	214.275	0
1.2987		0	0	574.859	0	323.767	0	66.863	668.914	0.053	0	0	0	1105.68	0	60.13	358.5	0	572.581	0	9.178
