# Supplementary material for: Molecular dissection of condensin II-mediated chromosome assembly using in vitro assays
Source: eLife journal article supplement (doi:10.7554/elife.78984), 2022-08-19
Supplement: supp [file Figure 1-figure supplement 1-source data 2.xlsx]

## Sheet: Figure 1-figure supplement 1
Figure 1-figure supplement 1-source data 2
Recombinant DNA constructs	SOURCE	IDENTIFIER
pET28a-XNpm2 (ΔC50)	Shintomi et al., 2015	XNpm2, Q6GQG6
pFastBac Dual vector-mSMC2, GST-(3C)-mSMC4	Kinoshita et al., 2015	mSMC2, Q8CG48; mSMC4, Q8CG47
pFastBac Dual vector-mSMC2(1114Q), GST-(3C)-mSMC4(E1218Q)	Kinoshita et al., 2015	N/A
pFastBac1-hCAP-D2	Kinoshita et al., 2022	hCAP-D2, Q15021
pFastBac1-hCAP-D2-dC (D2-CΔ92)	Kinoshita et al., 2022	N/A
pFastBac1-hCAP-G	Kinoshita et al., 2022	hCAP-G, P40121
pFastBac1-hCAP-H	Kinoshita et al., 2022	hCAP-H, Q15003
pFastBac1-hCAP-D3	This paper	hCAP-D3, P42695
pFastBac1-hCAP-D3-(3C)-StrepII	This paper	N/A
pFastBac1-hCAP-D3-C-tail(3C)-StrepII	This paper	N/A
pFastBac1-hCAP-G2	This paper	hCAP-G2, Q86XI2
pFastBac1-hCAP-H2	This paper	hCAP-H2, Q6IBW4
pFastBac1-StrepII-(3C)-hCAP-H2	This paper	N/A
pFastBac1-hCAP-H2-BC1D	This paper	N/A
pFastBac1-hCAP-H2-BC2D	This paper	N/A
pFastBac1-hCAP-H2-BC1/2D	This paper	N/A
