# Supplementary material for: Molecular dissection of condensin II-mediated chromosome assembly using in vitro assays
Source: eLife journal article supplement (doi:10.7554/elife.78984), 2022-08-19
Supplement: supp [file Figure 2-source data 1.xlsx]

## Sheet: Figure 2B
Figure 2-source data 1
Figure 2B
	Raw DAPI and hCAP-H2 intensity values
		buffer
		DAPI (overall)	hCAP-H2 (overall)
Chromosome cluster
1		22056583	803
2		16309737	679
3		16776572	29220
4		2607262	0
5		15535425	0
6		500981	0
7		32722828	514
8		7313932	0
9		11710680	0
10		9621528	0
11		268336	842
12		6979546	0
13		7438503	0
14		8320028	0
15		17604990	0
		holo(WT)
		DAPI (overall)	hCAP-H2 (overall)
Chromosome cluster
1		95574568	10955204
2		351868717	21591092
3		32400098	2809132
4		33474639	3023902
5		62552095	5263920
6		43732666	3714626
7		19088195	1653682
8		282024996	14540120
9		67964751	6432631
10		195348778	19808585
11		207620025	14449448
12		137166772	11075511
13		443778508	23628229
14		273753891	10168237
15		152519730	10226345
		ΔD3(WT)
		DAPI (overall)	hCAP-H2 (overall)
Chromosome cluster
1		19422330	414195
2		36251124	491948
3		89601609	1812919
4		61823937	907779
5		62699718	669589
6		56791172	283952
7		166520517	2611903
8		41897330	1454063
9		93397600	1199265
10		59948913	1186810
11		94586141	2236172
12		79439579	627565
13		104149360	1894172
14		70089030	703020
15		57120782	1461794
		ΔG2(WT)
		DAPI (overall)	hCAP-H2 (overall)
Chromosome cluster
1		1201944831	821201538
2		1071944686	741082996
3		1281214009	815920082
4		1065398230	807005322
5		1018456373	743499151
6		1466190064	937301571
7		1006151596	678941300
8		1518765175	1035135264
9		1135495426	738662724
10		1302538647	867314852
11		661493619	469557038
12		1351953839	804176920
13		990596415	726963569
14		470029764	293652450
15		1015434432	689514528
		ΔD3ΔG2(WT)
		DAPI (overall)	hCAP-H2 (overall)
Chromosome cluster
1		780235441	65087
2		158142929	0
3		460144164	14703
4		146463544	0
5		505792098	2121
6		161164115	1007
7		621884884	0
8		83190421	0
9		350478639	0
10		429734892	16666
11		120671006	0
12		807670185	0
13		592314746	706
14		115353123	0
15		191131884	0
