# Supplementary material for: Molecular dissection of condensin II-mediated chromosome assembly using in vitro assays
Source: eLife journal article supplement (doi:10.7554/elife.78984), 2022-08-19
Supplement: supp [file Figure 2-source data 2.xlsx]

## Sheet: holo(WT) 200 nM
Figure 2-source data 2
Figure 2D
Non-normalized values
	holo(WT) 200 nM
Chromosome sample		1		2		3		4		5		6		7		8		9		10		11		12		13		14		15		16		17		18		19		20
		DAPI	hCAP-H2	DAPI	hCAP-H2	DAPI	hCAP-H2	DAPI	hCAP-H2	DAPI	hCAP-H2	DAPI	hCAP-H2	DAPI	hCAP-H2	DAPI	hCAP-H2	DAPI	hCAP-H2	DAPI	hCAP-H2	DAPI	hCAP-H2	DAPI	hCAP-H2	DAPI	hCAP-H2	DAPI	hCAP-H2	DAPI	hCAP-H2	DAPI	hCAP-H2	DAPI	hCAP-H2	DAPI	hCAP-H2	DAPI	hCAP-H2	DAPI	hCAP-H2
Distance (µm)
-1.2987		0	63.386	651.053	97.235	6193.75	164.862	4252.91	0	0	33.886	709.634	34.207	799.511	64.069	3508.58	50.938	1504.57	0	0	0	5073.13	129.947	0	74.547	226.94	70.099	4064	178	0	20.141	0	0	1719.31	168.372	2851.49	113.883	0	43.227	0	315.838
-1.23377		467.477	34.679	1195.95	18.098	6533.46	166.183	4606.88	4.355	292.001	12.428	1461.52	55.11	796.642	31.012	4143.49	50.709	2012.4	14.597	140.596	2.918	5385.47	158.883	452.865	79.025	509.768	69.763	4410.67	206	299.775	0	340.23	8.752	1581.68	180.98	2900.26	129.911	366.441	51.572	934.925	381.815
-1.16883		840.798	77.284	1725.81	54.63	6571.71	224.412	5120.53	8.142	920.47	26.004	1838.33	73.044	1044.91	38.896	4463.84	35.749	2628.2	38.785	496.038	-5.028	5630.01	191.666	398.65	72.596	881.819	73.726	5002.67	227.333	593.209	33.075	732.796	-5.217	1611.39	206.902	3038.67	128.936	653.193	72.644	1822.89	420.221
-1.1039		1243.12	104.314	2029.77	133.54	7078.49	255.492	5407.15	34.887	1573.97	17.78	2185.74	50.76	1466.59	89.15	4789.19	33.766	2995.59	70.62	801.342	7.166	6032.51	214.765	493.175	80.772	1533.17	92.302	5695.33	270	1012.75	47.397	1268.98	-4.578	1798.72	199.46	3153.8	113.543	1008.06	74.017	2733	402.198
-1.03896		1654.54	125.774	2404.79	198.083	7301.63	242.107	5876.27	53.043	2346.33	37.485	2472.96	97.013	1943.78	98.021	5278.61	55.057	3866.51	48.036	1109.31	51.545	6616.26	261.815	636.543	73.996	1817.3	63.81	6310	370.666	1254.12	56.761	1672.33	19.734	2021.24	170.745	3772.53	97.748	1309.54	107.354	3773.51	372.694
-0.974026		2069.31	146.973	2805.59	209.051	7529.97	228.719	6327.25	74.851	3683.9	45.796	2567.31	99.048	2632.65	74.456	5710.96	91.909	4983.81	76.869	1358.99	42.435	6810.66	289.209	806.544	94.11	2369.32	124.214	6942.67	386	2258.87	37.529	2013.84	22.907	2323.03	175.294	4115.9	154.281	1698.18	150.278	5040.6	390.131
-0.909091		2572.28	157.436	3000.95	186.15	7877.97	250.818	7122.38	159.531	4805.65	46.567	2930.72	142.594	2885.9	104.106	6387.08	92.476	6211.98	104.748	1521.51	54.67	7103.18	269.003	869.778	104.74	3007.28	172.353	7893.33	454.666	2757.1	79.543	2288.18	50.489	2665.21	216.372	4451.42	163.448	2176	173.722	6012.01	408.329
-0.844156		3178.9	201.245	3363.39	153.276	8169.82	321.757	8093.28	175.302	5819.74	73.903	3311.6	120.126	3660.11	117.923	6804.44	134.788	7207.49	126.527	2023.71	82.39	7508.49	283.626	827.048	173.017	3691.89	168.754	8746.67	604.666	3390.8	113.079	2721.42	50.19	3019.76	232.951	4801.51	188.044	2527.3	183.129	7189.22	428.248
-0.779221		3800.57	266.225	3532.31	158.398	8584.77	295.988	8967.63	217.213	6700.66	101.986	3845.4	114.759	4334.19	139.269	7164.43	207.269	8130.96	135.178	2628.26	96.174	7895.16	323.311	1165.8	161.411	4329.72	150.496	9583.33	774	4324.78	155.485	3400.96	86.933	3586.21	297.039	5327.16	227.599	3228.96	202.26	8125.26	524.373
-0.714286		4556.84	357.671	4026.75	168.813	8898.41	339.617	9623.78	241.2	7318.35	152.115	4732.95	141.372	5226.44	282.361	7377.42	251.099	9396.18	181.213	3133.63	108.422	8250.72	315.752	1307.64	161.968	4990.6	194.855	9999.33	899.333	5163.16	201.503	4222.34	117.406	4008.82	303.882	5858.18	267.131	4018.33	250.595	9612.28	660.137
-0.649351		5240.34	480.405	4703.61	238.597	9045.72	369.12	9884.2	347.875	8257.15	178.477	5521.15	214.765	6192.4	407.083	7964.65	298.703	10320.2	278.576	3615.72	138.56	8499.24	328.386	1970.21	290.399	5862.12	316.307	10786	892	5928.03	277.996	5251.42	122.705	4516.47	310.745	6561.64	302.988	4697.85	309.438	10911.5	725.535
-0.584416		6488.15	687.614	4911.16	311.316	9335.69	414.696	10340.7	502.713	9185.64	253.796	6695.01	296.39	7259.42	541.41	8660.48	409.689	11350.1	387.486	4157.58	234.435	9095.65	397.095	2470.07	372.319	6689.44	399.135	11794.7	910	6766.12	363.304	6087.16	133.124	5257.74	378.058	7311.21	416.056	5599.39	409.879	12275.7	833.525
-0.519481		7551.9	965.097	5272.98	375.224	9651.94	542.938	10588.6	477.7	9766.44	344.569	8145.44	379.542	8271.81	639.667	9138.58	447.918	12637.8	529.191	4960.99	407.466	9917.02	423.494	2942.29	511.481	7150.18	469.328	12630.7	952	7590.81	555.126	7169.76	127.689	6121.49	426.607	7835.8	586.155	6421.06	491.024	13287.7	943.103
-0.454545		8316.5	1326.47	5516.45	485.492	10247.4	757.079	11112.2	698.204	10354.5	440.566	9143.06	550.875	8939.73	680.397	9966.29	664.245	14199.5	752.669	5702.79	643.789	10883.9	536.129	3561.65	793.536	7601.94	669.977	13332.7	1127.33	8617.79	901.911	8521.19	237.524	7266.65	517.039	8654.93	734.03	7163.12	680.284	14547.2	1126.39
-0.38961		9094.34	1806.77	5641.38	678.096	10651.2	1196.19	12153.2	881.01	10799.6	524.189	10420.9	766.853	9628.67	795.369	10326.1	879.715	15791.1	1098.64	6733.01	969.087	11977.7	711.271	3980.84	1297.82	8196.12	935.62	13948.7	1490.67	9222.77	1287.04	9868	418.08	8741.22	729.039	9190.14	1017.89	7788.04	915.052	16151.1	1402.53
-0.324675		9671.34	2357.03	6359.07	921.737	11320.4	1808.06	13021.3	1326.31	11243.4	786.306	11502.9	1117.09	10399.6	1011.2	10849.6	1087.69	17268.5	1529.22	7824.41	1475.13	13288	951.193	4272.34	1935.66	9133.55	1136.51	14948	1818	9950.76	1699.9	10726.2	596.754	10243.8	1166.96	10205.2	1514.01	8528.55	1241.41	17133.3	1899.1
-0.25974		10498.3	2937.59	7006.07	1296.54	11857.3	2450.1	13557.8	1889.95	12068.8	1441.8	12255.9	1418.62	11004.4	1462.33	11029.2	1248.17	18989.7	1891.39	9367.88	2239.58	14802.5	1238.68	5163.4	2493.68	10198.7	1382.41	16016	2130	10744.4	2098.99	11721.6	884.713	11497.2	1974.1	10947	2052.43	9381.93	1743.55	17810.5	2527.19
-0.194805		11579.3	3639.46	7538.82	1814.44	12262.3	2930.82	14691.8	2598.73	12894.8	2642.63	13066.2	1659.84	11674.8	2355.95	11603.6	1704.11	20213.2	2541.28	10916.1	3606.72	16542	1892.09	5859	3016.62	10779.4	1820.51	16897.3	2842	11801.7	2762.74	13185	1517.86	12773.1	3101.38	11486.5	2699.58	9889.02	2445.57	18291.8	3365.26
-0.12987		12595.5	4348.91	8421.79	2290.82	12258.8	3417.07	15616.4	3751.08	13556.7	4132.11	13834.8	1885.18	12308.9	3608.26	11694.4	2678.24	21040.4	3379.88	12895.9	5557.66	18369	3078.8	6780.65	3723.63	11554.2	3054.4	17784.7	3719.33	13343.1	3685.25	15016.2	2612.44	14316.1	4185.78	12426.1	4076.23	10562.4	3435.96	18759.4	4459.41
-0.0649351		13356.8	4874.78	9112.64	2415.87	11842.5	3943.59	16365.8	5056.38	13931.1	5269.68	14268.2	2116.37	13005.4	4588.22	11737.2	3636.03	20748.5	4264.05	14354.9	6912.08	20089.9	4123.88	7458.7	4208.74	12459.2	4384.32	17938	4806	14411.6	4561.03	16014.4	3428.36	15702.8	4861.57	13042.4	5620.54	11096.6	4435.94	19582.4	5537.6
0		13399	5047.69	9520.72	2482.89	11222.8	4004.24	16145.5	6299.53	13636	5347.05	14824.6	2242.31	13476.9	4954.46	11608	3678.74	19854.6	4711.35	15238.4	7614.61	21816.5	4550.27	8028.13	4391.3	13486.6	5469.55	18053.3	5549.33	15025.7	5017.42	16314.9	3621.86	16285.5	5058.43	13056.8	6398.96	11042.8	4725.62	20298.1	6490.23
0.0649351		13224.9	4706.8	10161.3	2358.79	10184.1	3472.18	15085.1	6088.75	13017.4	4391.51	15112.1	2056.25	13226.2	4674.21	10947.9	2969.47	19034.7	4331.3	15989.4	7095.76	22717.8	4147.95	8496.81	4085.03	13963.7	5396.76	17566.7	5476	15015.4	4803.47	15944.9	3149.91	16530.6	4908.05	12476	5939.71	10244	3814.8	20768.9	6444.24
0.12987		13239	4231.08	10698.2	2109.24	9328.69	2644.96	13789.8	4984.31	12143.1	2962.27	14921.2	1710.35	12770.8	4077.96	9966.34	2171.57	17431.3	3411.53	16471.1	5610.33	22290.9	2954.03	8584.14	3352.82	14722.3	4322.38	16592.7	4753.33	14388.1	4008.03	15547.3	2461.61	16222.8	4497.98	11433.5	4324.44	9312.75	2501.48	20803.5	5778.74
0.194805		12877.4	3831.17	10421.6	1818.42	8698.1	2117.37	12244	3264.43	11060.7	1879.57	14617.8	1478.11	11662.2	3192.42	8872.98	1436.93	16132.6	2447.64	16216.1	3907.1	20954.2	1800.11	8335.63	2605.9	14272.5	3263.1	15404.7	3822.67	13957.2	3206.18	14875.6	1911.34	15191.1	3821.35	10553.6	2596.12	8092.81	1448.97	20060.9	4922.69
0.25974		12122.3	3225	9805.02	1463.21	7901.62	1748.4	11217	2023.81	10424.7	1328.78	14036.5	1282.59	11089.9	2357.08	7677.83	870.241	14984	1796.44	16005.9	2602.59	18742.9	1028.05	8134.51	2058.41	12931.9	2255.54	13562.7	3004.67	13405.8	2451.54	14210.2	1468.99	14104.8	2962.69	10004.6	1574.95	6969.67	983.032	19449.7	4078.17
0.324675		11209.4	2580.38	8984.06	1140.91	7171	1372.01	10241.3	1481.05	9870.49	934.761	12979.5	1054.82	10361.9	1656.48	6952.85	553.321	14047.3	1360.52	15239.4	1850.73	16810.5	717.198	6995.93	1707.99	11597.5	1591.51	11888	2305.33	12800.6	1884.31	13455.1	1169.9	12820	2242.69	9361.8	1000.03	6175.48	767.053	18599.4	3287.72
0.38961		10249.1	1962.12	8129.28	969.07	6088	1168.38	9350.32	1293.34	9224.05	563.689	11618.7	870.845	9501.33	1088.74	6331.13	358.552	12838.6	972.542	14516.1	1508.02	14592.4	547.847	6326.95	1510.93	10372.4	1108.61	10704	1664	12173.4	1475.32	12665.1	855.611	11402.2	1811.43	8524.8	737.04	5514.96	486.961	17403.2	2330.61
0.454545		9159.68	1395.71	6938.43	817.901	5502.35	980.002	8649.69	1386.2	8490.37	374.981	10090.4	575.775	8633.92	697.45	5741.05	260.462	11547.6	721.474	13764.5	1336.24	13108	388.779	5425.14	1272.53	9225.24	792.942	9598.67	1079.33	11719.9	1176.22	11742.2	614.516	10077.3	1504.39	7798.57	516.178	4904.61	341.928	15596.7	1651.73
0.519481		8372.33	979.31	6375.41	675.767	4720.06	804.513	7827.92	1250.6	7679.23	302.965	9127.53	404.235	7740.18	452.953	5189.72	207.361	10113.3	621.414	13001.4	1198.12	11906.6	291.765	4650.41	984.559	8225.1	580.603	8706.67	672.666	11754.2	905.289	10698.5	479.52	8969.41	1166.8	6859.98	416.936	4437.29	238.711	14241	1271.27
0.584416		7675.35	712.127	5741.4	529.173	4093.91	626.204	7068.26	1079.69	6929.8	255.463	8172.91	313.916	7061.17	271.383	4490.76	152.374	8632.08	483.132	12157.4	1133.12	10461.4	192.015	4002.82	665.948	7079.53	408.514	7760	494	11410.5	701.598	9923.11	366.901	8001.12	834.852	6050.2	337.513	3724.15	171.611	12881.5	1046.74
0.649351		6967.14	471.305	5364.97	384.843	3710.58	435.892	6605.61	881.085	6342.7	239.971	7517.61	290.226	6253.87	190.496	3873.69	119.759	7413.79	381.257	11487.9	976.977	9003.54	136.823	3525.61	483.436	5924.92	343.268	6840.67	383.333	10584.2	562.912	8917.07	286.949	7104.73	514.372	5175.18	247.814	2973.98	172.992	11505.6	874.94
0.714286		6203.69	332.016	4704.39	257.428	3347.96	333.982	5583.35	784.471	5731.38	268.315	6685.21	208.97	5769.39	170.042	3342.48	117.528	6034.16	267.482	10828.9	756.108	7629.11	134.703	3019.62	361.167	5328.57	212.801	6044	301.333	9721.12	430.525	8342.66	233.828	6267.59	330.127	4407.46	211.91	2646.84	134.538	9927.17	738.508
0.779221		5158.53	230.807	3993	202.673	2762.11	292.021	4949	596.479	4888.33	230.273	5663.07	128.423	5085.51	77.48	2807.56	94.2	4898.31	195.627	10090.5	560.881	6438.23	48.39	2490.5	195.819	4393.37	171.871	5358.67	238	8985.96	361.52	7463.58	159.672	5402.16	278.96	3589.51	167.757	2276.43	99.086	8717.65	632.033
0.844156		4255.42	184.956	3580.02	123.921	2444.84	197.219	4253.23	526.858	4156.23	174.452	4809.48	117.509	4266.46	47.497	2288.88	74.861	3977.73	130.335	9356.31	388.094	5386.5	55.767	2249.91	182.278	3969.56	146.462	4948.67	225.333	8239.67	266.926	7215.29	97.491	4542.3	242.421	3126	121.916	1823.94	98.502	7508.28	527.806
0.909091		3584.85	131.949	3264.5	88.048	1943.64	208.538	3318.43	299.824	3418.59	103.303	4228.16	132.447	3676.17	21.465	1912.81	60.947	3143.15	94.38	8489.86	333.153	4370.66	46.817	1974.77	152.173	3272.76	110.442	4523.33	138.666	7689.93	189.581	6844.18	72.35	3560.53	198.745	2915.88	100.726	1514.4	67.662	6274.18	447.292
0.974026		2706.33	130.822	2801.92	51.207	1505.55	168.39	2614.23	176.941	2779.86	63.426	3552.37	88.518	3022.43	40.239	1419.11	56.251	2492.92	65.227	7787.19	296.009	3404.05	26.879	1675.22	135.402	2697.96	84.522	3838	49.333	6920.52	168.579	6233.57	70.795	2646.02	146.941	2570.68	77.602	1434.53	31.877	5440.57	439.79
1.03896		2150.34	91.668	2161.56	32.388	1160.11	140.841	2036.35	130.17	2291.44	48.448	2909.42	59.603	2356.73	29.25	997.085	45.192	1833.6	50.615	7092.72	251.986	2499.7	53.905	1456.62	107.382	2122.79	61.817	2941.33	22	6325.97	122.478	5753.18	26.367	1891.84	92.843	1847.8	50.241	1052.23	29.312	4828.92	428.961
1.1039		1701.74	51.189	1666.57	-6.216	993.505	145.229	1405.92	91.966	1862.28	52.259	2112.19	31.548	1729.17	12.74	787.311	36.988	1237.53	42.867	6322.31	226.088	1866.77	33.288	1239.25	77.129	1605.92	29.503	2183.33	10	5849.83	151.122	5407.92	47.351	1247.74	63.245	1351.78	27.222	755.947	34.493	3856.97	380.655
1.16883		1032.62	7.99	1256.18	2.941	596.936	100.834	783.128	53.385	1556.64	30.838	1451.33	54.223	1193.14	1.662	564.687	38.365	786.951	43.976	5450.43	187.188	1170.97	16.107	930.058	53.967	986.675	0	1194	14.666	5349.33	152.076	5218.42	34.389	733.509	29.411	858.993	19.265	593.393	8.085	3079.95	378.379
1.23377		699.943	0	666.37	16.855	441.734	46.084	422.515	33.004	1265.8	14.718	975.962	27.442	584.137	13.122	346.495	4.494	487.182	34.105	4501.29	163.682	547.366	13.62	696.505	24.127	644.735	15.168	452	2	4859.22	113.04	4808.46	2.347	395.843	0	385.763	21.729	394.624	4.062	2654.19	339.733
1.2987		183.002	7.198	0	0	0	0	0	14.366	799.314	0	0	0	0	0	0	0	0	38.55	3671.9	141.337	0	0	364.251	0	0	2.072	0	0	4612.45	123.625	4142.62	12.104	0	5.039	0	0	126.75	0	1946.44	0

## Sheet: ΔG2(WT) 25 nM
Figure 2-source data 2
Figure 2D
Non-normalized values
	ΔG2(WT) 25 nM
Chromosome sample		1		2		3		4		5		6		7		8		9		10		11		12		13		14		15		16		17		18		19		20
		DAPI	hCAP-H2	DAPI	hCAP-H2	DAPI	hCAP-H2	DAPI	hCAP-H2	DAPI	hCAP-H2	DAPI	hCAP-H2	DAPI	hCAP-H2	DAPI	hCAP-H2	DAPI	hCAP-H2	DAPI	hCAP-H2	DAPI	hCAP-H2	DAPI	hCAP-H2	DAPI	hCAP-H2	DAPI	hCAP-H2	DAPI	hCAP-H2	DAPI	hCAP-H2	DAPI	hCAP-H2	DAPI	hCAP-H2	DAPI	hCAP-H2	DAPI	hCAP-H2
Distance (µm)
-1.2987		1645.72	0	944.94	34.78	2522.6	57.061	0	0	0	3.464	144.431	69.572	1292.68	22.826	3366.21	0	3974.15	65.88	0	40.344	0	120.731	1258.17	63.239	0	136.404	0	0	590.955	74.958	0	132.7	1549.15	0	876.023	0	0	0	0	9.009
-1.23377		2222.43	9.982	1093.93	61.713	2891.59	58.98	435.216	22.855	294.229	0	1270.49	80.974	1941.08	0	3611.87	9.172	5069.96	79.882	576.003	67.717	478.3	152.431	1414	102.422	621.32	157.771	498.81	8.595	888.394	98.835	674.613	157.284	1845.19	65.859	1565.1	63.996	585.365	15.624	386.848	0
-1.16883		3011.51	22.649	1197.94	75.842	3000.03	77.238	745.213	30.909	556.382	15.006	2711.58	103.89	2564.68	38.301	3943.96	21.505	5723.56	26.901	1072.9	95.76	868.831	143.238	1740	125.944	1721.88	172.764	743.44	9.226	1325.31	143.668	1345.77	130.618	2694.58	54.785	2334.51	58.611	816.946	31.522	1029.03	5.652
-1.1039		3898.7	30.859	1411.72	73.006	3319.44	64.653	1293.68	59.564	920.691	40.012	3914.58	96.201	3108.69	102.356	4382.26	-10.163	6690.27	0	1653.91	81.112	1136.66	154.115	2392.82	122.62	2364.48	211.128	1049.29	13.643	1434.25	88.816	2062.73	165.581	3673	143.394	3150.27	132.301	1535.16	70.085	1464.31	21.755
-1.03896		4548.31	44.965	1721.68	72.173	3853.02	121.959	1692.26	47.902	1055.27	52.832	5368.22	129.199	3390.59	180.488	5336.34	-11.244	7330.72	18.181	2267.09	126.328	1527.76	174.415	2277.83	159.183	3052.33	190.739	1239.15	21.143	1951.28	63.911	3043.55	202.354	4520.39	224.224	3861.11	165.757	2242.56	69.347	1970.63	37.994
-0.974026		5097.07	48.628	2050.67	105.449	4294.35	179.32	2078.81	70.024	1243.4	21.381	7020.54	176.594	4119.33	271.763	5822.35	6.261	7802.33	24.752	2850	143.423	2026.43	213.51	2811.55	155.803	4349.49	255.203	1653.9	35.976	2567.09	37.106	3786.01	211.497	5543.81	280.131	4735.09	228.365	3105.49	99.145	2132.49	19.401
-0.909091		5664.48	35.997	2292.71	112.59	4478.76	168.789	2456.67	88.565	1592.39	40.086	7964.55	201.795	4701.9	337.056	6399.39	39.448	8231.27	77.192	3622.2	191.567	2354.05	272.261	3311.18	207.239	5053.61	303.444	2306.45	44.286	3718.47	59.112	4731.57	263.005	6553.3	502.39	5295.09	303.502	4119.76	152.258	2371.1	46.096
-0.844156		6014.04	64.373	2497.38	173.354	4816.12	139.592	2899.62	102.059	1955.08	71.967	8841.32	271.264	5463.36	304.908	6862.96	50.178	8468.13	46.393	4272.21	187.602	2990.58	315.29	3592.17	253.408	5901.19	414.628	2873.67	36.833	4386.39	30.912	5611.82	306.716	7807.57	713.432	5708.13	346.116	5439.41	225.23	2768.54	67.26
-0.779221		6640.21	103.158	2498.14	190.751	5096.08	190.218	3186.22	107.136	2446.74	78.002	10386.4	348.221	6131.47	276.301	7448.85	53.887	9142.65	34.24	4642.36	247.45	3466.92	326.9	3962.45	266.789	7117.51	482.741	3294.58	80.339	5389.23	34.295	6249.81	371.902	9166.49	996.086	6035.17	441.926	6480.05	295.826	3010.09	85.629
-0.714286		6962.52	113.384	2863.57	232.566	5566.38	212.286	3696.61	206.061	2908.04	142.175	10720.2	397.485	6382.29	334.642	8012.62	83.561	10080.5	88.507	5394.4	271.48	4126.51	355.352	4492.99	313.521	8216.88	607.524	3921.36	142.857	6199.36	78.272	6994.95	380.086	10557.3	1349.67	6428.66	547.936	7678.7	387.131	3251.73	90.107
-0.649351		7476.97	132.895	3241.48	258.265	5626.77	220.653	4265.89	289.131	3385.35	204.261	11915.5	439.803	7550.15	342.706	8951.92	107.051	11377.6	146.446	5595.48	294.055	4802.02	346.399	5331.58	358.535	9454.95	731.106	4414.51	182.893	7052.12	133.577	7767.43	409.021	12141	1822.43	6607.74	633.598	8457.84	524.796	3463.49	179.428
-0.584416		8463.04	188.884	3641.98	326.86	6036.53	322.463	4600.1	333.211	4066.56	259.65	13613.1	524.14	8248.16	413.906	9989.07	143.853	12286.7	178.758	6078.97	410.205	5293.75	446.97	6061.58	436.253	10322	957.465	4992.14	245.262	8351.87	140.348	9032.74	427.241	13124.7	2371.91	7110.57	952.034	9188.96	558.899	3971.69	222.978
-0.519481		9303.74	202.293	4199.57	503.342	6155.35	464.653	5205.8	333.931	5044.31	381.044	15156	679.561	9043.04	506.174	10732.3	258.382	13676.9	288.998	6822.02	535.325	5811.34	560.974	6579.21	559.408	11200.6	1105.39	6140.41	343.071	9667.22	181.491	9627.67	524.694	13557.4	3110.33	7678.38	1179.47	10490.3	580.535	4337.51	311.233
-0.454545		10082.3	258.273	4625.56	549.644	6646.98	568.449	6162.4	438.506	5897.83	591.874	16239.1	788.712	10176.7	718.255	11387	445.822	15086.8	498.804	7666.11	683.452	6258.92	713.211	7460.31	646.732	12013.6	1267.76	7372.14	590.143	11420.3	334.405	10225	667.394	13463.9	3744.97	8449.94	1491.38	11818.9	652.192	4672.43	385.757
-0.38961		11003.3	406.512	5212.62	588.262	7163.36	650.408	6752.81	742.97	6807.89	965.277	17318	973.649	10949.7	880.71	12197.3	702.469	16496.4	843.308	8421.7	871.423	6878.7	1045.17	8135.27	803.972	13333.1	1609.87	8698.38	1023.5	13360.4	662.999	11145.9	797.842	13892.8	4106.75	8834.93	1669.88	12512.8	745.668	4967.06	582.795
-0.324675		11692.7	609.761	5679.63	795.346	7577.97	799.565	7422.63	1046.69	7880.77	1521.49	18624.8	1134.31	11900.6	1331.45	13396.2	1191.73	18521.1	1336.66	9291.62	1309.38	7603.69	1524.75	9540.11	873.183	14226.6	2052.73	10136	1626.64	15227.5	1119.06	11649	911.978	14324.7	4579.97	9425.6	2176.81	13639.3	1054.07	5706.54	923.14
-0.25974		12557.3	998.777	5956.55	1008.66	8196.61	1208.16	8252.19	1353.18	8773.59	2007.37	20187.9	1467.04	12848.1	2012.5	14917.5	2051.56	20123.1	2087.3	9927.99	1841.28	8421.29	2078.7	10978.5	997.493	15646.3	2597.56	11510.8	2543.62	16876.5	1843.07	12374.3	1539.09	15313	5006.45	10010.9	2934.42	14703.7	1575.26	6380.45	1491.56
-0.194805		13835.7	2248.92	6472.68	1822.39	8748.77	2062.65	9031.97	2007.49	9823.89	2780.9	21007.1	2118.87	13712.7	2822.79	16289.2	3954.35	21391.6	3388.06	10935.1	2736.93	9143.49	3301.54	12701.3	1433.35	17231.8	3522.01	12834.4	3482.09	17901.1	3312.41	13225.5	2808.39	15833	5982.03	10706.4	4293.28	16568.9	3224.5	7230.04	2559.06
-0.12987		15208.9	4193.77	7146.69	3216.61	8611.09	3515.73	9976.48	3800.09	10970.5	4344.93	22393.3	3585.53	14112.8	3592.4	17670	6829.13	21820.3	4759.16	11942.3	4050.3	10080.6	5438.4	14519.5	2430.51	19007.9	5139.98	13877.1	4484.2	19653	5579.1	14318.3	5277.92	16511	6789.19	11414	6207.32	18064	6249.49	7978.94	4186.24
-0.0649351		16227.4	6637.83	7848.3	5049.49	8718.94	4903.88	11043.5	6283.77	11626.3	6203.15	23581.8	5540.43	14504.9	4221.8	18077.8	9831.14	22084.6	6195.31	12125.7	5898.97	10521.6	8315.39	15696.3	4205.27	19823.7	6962.79	15041.5	5406.6	21832.6	7690.83	15728.8	8190.99	17268.8	7528.58	12288.6	7917.81	20155.7	10550	8829.88	6180.69
0		16560.7	7687.72	8266.08	6130.28	8903.97	5504.52	11269.8	8095.27	11706.4	7273.68	23023	6441.12	14710.4	4300.43	17091.6	11077.8	21791.4	7280.51	11694.1	6559.99	10843.6	9557.75	16069.8	5814.82	19967.4	7432.63	15855.9	5926.26	23622.5	8048.58	16659.5	9700.42	17235.9	7709.82	12833.4	8473.43	21617.8	13209.5	9009.8	7487.53
0.0649351		16070.3	6569.57	8002.16	5538.17	8342.64	4752.71	10577.3	7886.54	11252.7	6772.28	21247.3	5877.52	13856	3618.47	15498.8	9737.45	20603.8	6764.93	11115.1	6086.32	10569.9	8254.55	15122.5	5757.01	19164	6578.68	16127	5690.5	23437	6486.71	17566.2	8955.84	16643.4	6540.18	12439.5	7090.99	22471.7	12921.3	8795.8	7118.92
0.12987		14141.6	4524.67	7162.89	4017.05	7956.57	3468.33	9563.45	5905.43	10356.6	4970.22	19249.3	4255.9	12832.2	2643.11	13623.5	6627.81	19173.7	5794.13	10125.4	4527.42	9784.61	5445.59	13305.9	4152.53	17755.5	4357.9	15852.3	4789.07	20937.7	4309.01	17025.8	6449.15	15854	4926.51	11577.8	5117.02	22575.8	9606.06	8095.87	5467.6
0.194805		13057.6	2746.37	6440.14	2405.12	7253.06	2125.81	8400.34	3586.51	9461.73	2968.36	16867.2	2577.81	12038.4	1806.62	12288.7	3632.3	17819.8	4496.63	9315.77	2952.42	8940.81	3081.63	11395.2	2152.48	15917.2	2530.83	15437.6	3723.93	18466.4	2882.44	15952.4	3988.6	14516.3	3482.69	10220	3414.14	23239.2	5811.94	7649.59	3364.05
0.25974		12015.3	1807.39	6029.28	1363.22	6472.77	1329.99	7734.94	1857.15	8780.55	1667.44	14679.2	1424.89	11322.8	1184.01	11196.2	1866.43	16601.6	3407.14	8530.63	2016.77	8536.36	1864.39	10500.6	1053.13	13944.3	1407.53	14382.4	2740.02	16079.9	2243.41	14867	2498.63	13326.3	2544.58	9403.53	2255.79	22151	3867.47	7254.37	2120.73
0.324675		10944.8	1360.97	5526.74	753.682	5965.02	933.633	7282.05	975.254	8201.26	1085.4	12806.9	840.484	10662.1	837.943	10292.4	1209.29	14529.6	2610.02	7405.48	1409.22	8227.11	1297.1	9537.8	535.042	12669.7	843.751	13016.2	2052.86	15032.4	1621.76	13487.7	1998.05	12159.3	1885.3	8513.66	1599.86	21025.5	2776.82	6407.88	1480.37
0.38961		9911.5	1083.45	4751.6	509.349	5499.5	749.279	6658.23	555.479	7938.18	803.151	11356.6	530.499	9466.76	750.444	9292.58	937.463	13388.1	1972.34	6754.34	1008.21	7775.5	882.742	9186	424.113	11535.6	487.731	12059.9	1438.14	13510.6	1014.67	12252.1	1691.7	11624.1	1367.65	7651.7	1284.72	19788.6	2200.46	5686.43	1059.67
0.454545		8835	801.436	3991.72	357.25	4986.31	559.769	6221.29	421.321	7850.49	559.943	10499.1	356.194	8744.69	630.682	8839.78	776.363	12298.4	1475.82	6138.39	619.524	7444.39	632.144	8474.85	329.775	10263.4	350.022	11589.6	1091.36	11957.7	666.363	10611.1	1255.41	10536.3	980.11	6889.54	1007.28	18770.1	1634.63	5272.15	761.786
0.519481		8020.73	695.643	3899.26	296.83	4510.53	429.143	5630.2	326.972	7477.14	400.036	9613.32	278.95	8216.44	499.198	8178.25	650.93	11373.1	1146.5	5548	367.26	6991.08	468.027	7803.13	252.817	9636.17	223.597	10583	866.333	10135	482.373	9582.49	812.449	9492.62	753.274	6205.09	785.985	17609.8	1130.47	5133.81	620.368
0.584416		7289.99	663.789	3302.64	188.094	3912.49	322.204	5117.32	244.469	6958.76	283.916	8780.62	259.256	7680.01	418.301	7187.39	575.448	10460.3	884.259	5132.39	292.831	6476.3	369.456	6950.87	150.986	9067.4	195.816	9516.74	691.31	8871.56	346.064	8513.68	393.78	8936.63	607.558	5331.57	601.14	17173.5	855.888	4725.38	522.314
0.649351		6466.77	567.816	2897.77	112.404	3446.16	223.102	4787.22	239.156	6202.64	241.955	7501.96	239.764	6967.79	360.382	7078.73	444.843	9156.68	723.85	4464.92	219.027	5820.35	321.265	5461.61	137.775	8626.8	143.848	8137.57	530.339	8209.52	295.501	8356.46	279.382	7694.23	524.815	4575.19	416.963	16334.8	714.997	4338.01	427.02
0.714286		5492.66	419.632	2375.81	100.291	3146.77	188.653	4238.83	172.461	5390.13	218.326	6392.03	258.487	5957.88	293.768	6443.15	332.851	8093.38	652.919	4000.76	184.251	4879.44	288.79	4323.66	124.31	7958.25	117.406	7644.62	462.024	7250.51	224.939	7429.92	201.95	6323.62	396.432	4285.34	328.531	15453.6	559.703	4188.24	332.67
0.779221		4527.87	359.586	2213.21	72.061	2801.13	168.803	3907.42	115.76	4949.87	163.151	5419.86	201.722	4877.86	243.368	5835.86	276.938	6694.22	579.17	3696.51	189.809	4271.89	197.908	3211.97	66.591	7483.32	88.986	6619.85	379.661	6779.49	179.555	6441.12	155.382	5526.8	334.173	3753.46	319.419	14685.6	403.5	3776.76	279.556
0.844156		3736.54	318.142	1841.39	51.647	2206.03	114.517	3646.24	110.849	4637.58	120.956	4152.87	106.925	4109.36	212.357	5115.71	233.463	5762.76	563.091	3220.41	191.257	3854.3	158.651	2330.51	56.338	7161.36	103.841	5825.86	344.357	5766.17	128.246	5664.07	108.704	4466.79	276.659	2932.13	231.876	13843.8	316.962	3795.76	239.316
0.909091		3128.62	289.002	1651.49	62.387	1889.02	94.286	3117.98	52.289	4151.75	119.254	3224.71	25.292	3183.55	157.39	4007.13	201.115	4859.65	470.86	2661.81	180.218	3076.88	72.868	2022.73	52.028	6543.75	95.295	5391.98	292.982	5052.73	80.292	5038.11	63.181	3663.39	257.341	2628.09	166.365	12685.1	231.574	3409.39	211.428
0.974026		2483.92	231.173	1683.46	8.2	1623.25	59.946	2708.08	38.621	3642.81	90.983	2538.05	31.744	2221.32	128.592	2939.97	166.76	3917.08	405.429	2382.03	152.38	2587.99	81.019	1490.99	66.451	5906.8	78.002	4374.33	260.5	4203.7	75.484	4435	57.156	3127.54	220.428	2212.7	123.1	11829	196.559	3016.15	179.785
1.03896		2041.82	246.197	1067.72	0	1157.77	73.796	2362.86	58.781	3311.02	89.868	1978	0	1748.92	80.034	2122.58	166.034	2802.35	293.27	2020.11	59.44	2003.03	53.677	1372.34	52.648	5219.5	71.397	3646.09	238.821	3470.43	41.844	3671.08	56.063	2445.61	178.033	1842.79	132.691	10717.9	155.803	2762.53	126.629
1.1039		1332.47	221.788	726.001	5.919	811.836	56.612	1878.76	39.98	2850.43	74.285	1428.7	19.622	1158.85	71.637	1347.6	170.911	2753.11	205.678	1562.53	33.973	1482.68	47.17	903.944	29.183	4524.26	38.886	2814.43	196.81	2507.05	16.448	2724.17	49.251	2089.94	184.102	1609.82	105.936	9693.25	142.106	2559.94	116.986
1.16883		841.302	148.691	578.212	19.435	555.442	53.986	1652.95	51.918	2286	31.115	1017.25	36.526	635.318	83.486	665.047	118.692	1711.34	189.524	1252.26	5.606	1026.28	34.358	596.535	38.958	4103.44	38.67	1902.03	199.988	1684.93	60.046	2033.48	15.933	1528.22	198.348	1264.33	94.326	8336.59	85.846	2124.59	98.943
1.23377		335.75	147.242	326.774	12.598	175.959	55.809	1533.95	31.208	1937.49	56.286	501.849	13.14	324.151	49.387	354.363	116.072	771.438	190.365	1103.41	6.307	615.689	6.836	287.803	0	3497.26	31.388	787.571	188.071	735.755	12.172	1554.42	15.662	917.064	182.768	640.237	97.933	7150.72	60.648	1708.68	83.166
1.2987		0	153.24	0	18.916	0	0	1097.18	41.317	1711.72	62.99	0	5.962	0	22.885	0	96.234	0	147.582	593.131	0	187.238	0	0	9.746	2939.56	0	64.827	111.345	0	0	818.646	0	0	158.516	0	61.433	6218.09	44.405	1137.26	89.865

## Sheet: ΔG2(WT) 200 nM
Figure 2-source data 2
Figure 2D
Non-normalized values
	ΔG2(WT) 200 nM
Chromosome sample		1		2		3		4		5		6		7		8		9		10		11		12		13		14		15		16		17		18		19		20
		DAPI	hCAP-H2	DAPI	hCAP-H2	DAPI	hCAP-H2	DAPI	hCAP-H2	DAPI	hCAP-H2	DAPI	hCAP-H2	DAPI	hCAP-H2	DAPI	hCAP-H2	DAPI	hCAP-H2	DAPI	hCAP-H2	DAPI	hCAP-H2	DAPI	hCAP-H2	DAPI	hCAP-H2	DAPI	hCAP-H2	DAPI	hCAP-H2	DAPI	hCAP-H2	DAPI	hCAP-H2	DAPI	hCAP-H2	DAPI	hCAP-H2	DAPI	hCAP-H2
Distance (µm)
-1.2987		356.101	0	483.714	977.755	483.714	400.816	128.144	70.56	2272.61	173.711	0	80.468	1040.48	350.993	1486.92	499.919	717.142	177.428	191.869	635.911	2181.03	336.3	439.343	0	0	0	0	65.978	432.211	108.056	0	165.834	0	0	106.922	132.936	0	351.303	3513.72	0
-1.23377		366.29	60.105	521	1046.17	521	469.229	309.285	100.581	2405.41	263.306	67.189	53.418	1149.42	345.167	1596.25	590.978	788.941	86.028	473.875	676.178	2396.3	359.351	653.245	19.306	204.42	32.23	168.934	21.458	684.085	206.08	148.48	200.161	421.453	23.799	280.655	101.214	25.538	370.56	3779.6	21.672
-1.16883		377.978	97.485	704.52	1076.87	704.52	499.928	382.579	177.047	2483.29	346.198	62.509	0	1223.56	403.625	1845.81	587.648	1046.48	53.724	613.536	743.226	2476.39	369.843	815.7	84.328	334.92	42.32	500.394	0	901.044	225.241	308.534	204.656	737.518	37.909	423.197	90.081	145.125	408.205	3996.51	37.76
-1.1039		427.942	84.755	768.571	1176.11	768.571	599.173	594.332	176.553	2474.73	396.674	100.648	73.631	1283.13	442.593	2158.21	630.745	1117.15	63.908	791.47	910.202	2717.29	350.466	1145.27	104.131	548.76	97.3	836.374	27.67	1071.73	270.053	513.874	265.547	1088.38	46.135	620.624	132.059	276.822	471.213	4231.94	61.52
-1.03896		538.971	66.615	774	1246.06	774	669.122	704.686	307.031	2518.45	507.105	247.195	141.438	1585.67	436.863	2293.93	630.734	1263.26	39.306	1102.96	892.928	2746.5	432.741	1283.29	150.404	741.52	181.76	1241.16	15.383	1416.69	341.652	718.065	308.368	1636.75	164.307	790.364	128.041	325.567	499.371	4549.97	78.562
-0.974026		507.903	79.608	936.342	1313.67	936.342	736.729	829.706	423.986	2600.53	664.675	342.459	178.335	1551.58	451.38	2471.18	660.625	1173.76	11.14	1299.21	879.417	3235.62	444.778	1413.95	120.572	969.75	221.5	1873.72	40.778	1827.13	424.909	838.72	385.483	2154.93	339.932	906.364	155.732	524.928	541.594	4759.39	91.372
-0.909091		523.017	88.637	983.918	1423	983.918	846.061	986.67	487.042	2796.38	833.314	974.438	313.077	1649.47	546.629	2550.77	739.76	1292.21	100.867	1621.38	936.072	3475.01	547.814	1801.86	161.808	1184.32	295.96	2630.14	65.037	2114.37	481.586	1081.31	453.795	2684.79	389.277	1180.59	219.997	607.025	619.108	4968.96	124.753
-0.844156		580.721	85.822	1225.73	1475.67	1225.73	898.734	1145.58	570.568	2969.16	1017.09	1325.43	362.32	1910.24	556.298	2678.72	726.388	1334.25	186.788	1911.8	1106.68	3727.42	686.604	2194.12	230.767	1640.71	427.04	3347.65	81.428	2358.92	641.085	1355.11	564.774	3384.09	512.118	1543.95	226.335	929.597	721.333	5357.19	155.084
-0.779221		790.644	160.299	1448.65	1673.1	1448.65	1096.16	1147.7	819.535	3099.09	1341.65	1664.46	511.202	2287.85	593.583	2947.81	841.581	1337.06	206.04	2142.53	1216.08	3960.93	755.924	2401.29	377.253	2072	568.88	4677.49	186.787	2933	777.875	1641.43	609.631	3880.29	498.533	1958.57	349.445	1003.69	856.428	5551.29	232.496
-0.714286		971.009	203.276	1580.9	1713.26	1580.9	1136.32	1220.19	1062.6	3368.74	1782.79	1893.52	481.193	2609	782.836	3094.42	928.104	1527.54	291.125	2432.26	1262.08	4231.83	881.722	2766.45	389.963	2499.55	716.98	5595.17	161.645	3298.07	1000.59	1890.23	712.551	4137.53	551.745	2217.23	474.186	1181.17	961.371	5937.69	345.378
-0.649351		1246.7	311.334	1681.48	1934.8	1681.48	1357.86	1309.34	1221.61	3445.22	2489.41	2350.07	779.48	3236.65	942.051	3232.11	936.51	1448.37	417.173	2711.34	1390.46	4226.31	1175.28	2865.43	541.32	3055	893	6512.71	253.831	3559.01	1369.33	2146.34	884.102	4535.02	640.272	2653.76	587.985	1455.14	1272.11	6297.07	491.086
-0.584416		1528.64	514.151	2103.88	2194.11	2103.88	1617.17	1392.75	1595.47	3604.16	3391.47	2779.28	797.444	3875.39	1164.19	3379.07	1139.93	1445.41	528.747	2806.61	1607.04	4556.59	1454.41	3169.02	728.783	3629.41	1074.63	7830.89	374.043	4004.4	1788.22	2448.81	1127.97	5116.85	938.824	2994.26	777.144	1835.43	1652.79	6725.93	578.169
-0.519481		1883.46	824.412	2610.14	2593.37	2610.14	2016.43	1584.77	2123.04	3921.93	4456.4	3292.52	1168.81	4253.99	1422.42	3569.16	1173.19	1585.76	622.653	2877	2061.79	4758.13	1760.56	3627.71	1091.53	4147.2	1410.72	8949.12	498.209	4278.74	2390.6	2780.22	1509.87	6144.45	1266.33	3398.87	1272.65	2161.44	1952.5	7211.96	857.963
-0.454545		2094.04	1465.31	2801.92	3059.75	2801.92	2482.81	1932.34	3158.53	4149.8	5584.65	4144.39	1537.32	4468.56	1794.97	3969.37	1567.2	1626.21	781.492	3163.59	2877.89	5054.69	2200.43	4192.95	1601.32	4630.52	2039.77	9811.56	712.995	4764.3	3273.72	3135.03	1931.34	7312.18	1828.04	3790.03	1804.65	2709.81	2494.13	7763.2	1094.56
-0.38961		2299.83	2187.88	3224.94	4225.35	3224.94	3648.41	2244.43	4525.68	4297.52	6640.93	4932.05	2346.22	4998.35	2293.91	4117.71	1843.29	1728.92	1102.4	3208.7	4149.38	5490.03	2932.22	4771.26	2438.25	5041.4	3375.52	10166.8	933.118	5040.86	4778.78	3788.78	2344.99	8899.76	2302.98	4385.3	2390.67	3174.26	3430	8300.84	1705.67
-0.324675		2820.58	4042.37	3769.14	5682.44	3769.14	5105.51	2423.65	6105.54	4452.6	7543.59	5303.87	3899.06	5274.57	3055.99	4212.55	2631.43	1963.35	2264.36	3782.04	5965.87	6116.05	3979.75	5197.84	3866.74	5648.5	5591	10264.4	1564.98	5430.1	7113.21	4119.03	3881.01	10097.1	3570.52	4902.67	3121.82	3827.79	4676.87	9178.07	3065.85
-0.25974		3104.34	7432.05	4171.88	8156.12	4171.88	7579.18	2860.25	7938.73	4626.29	9435.85	5875.11	5853.57	5534.88	4468.8	4616.15	4345.53	2299.43	4835.27	3993.05	8635.89	6325.98	6646.88	5350.96	6977.94	6388.48	9480.48	10790.7	3842.09	5693.74	10432.3	4640.47	7220.92	11240.8	6139.02	5412.69	4933.06	4487.82	7272.83	10126.3	6126.21
-0.194805		3529.58	13411.3	4541.71	12159	4541.71	11582.1	3242.85	11676.2	4821.76	12533	6632.54	8987.16	5677.12	7900.24	4970.23	9768.78	2587.8	10198.1	4278.35	14043.8	6914.24	12134.7	6140.04	13744.8	7073.69	15405.6	11815.8	10424.2	6157.53	16559.3	5305.75	14203.4	12560.2	11352.9	5901.3	9222.47	5041.8	12942.3	11053.3	11271.4
-0.12987		3745.12	19343.5	5092.77	18806.3	5092.77	18229.4	3648.95	17237.7	4879.44	16010.8	7497.61	13322.2	5941.34	14322.7	5605.86	18277.8	2813.82	17944.8	4547.16	22275.6	7529.65	20348.3	7211.12	24413.6	7640.6	23526.3	12557.4	20547.4	6792.19	24513.1	5935.35	22947	13631.3	20180.5	6287.86	18551.1	5689.87	22122.2	11501.6	17565.7
-0.0649351		3954.36	23465.1	5406.57	26270.4	5406.57	25693.5	3857.85	22675.8	4802.71	18797.6	8451.41	19193	6159.02	21745.3	6290.3	26404.2	2945.49	24207.4	4837.38	29916.2	8040.03	27324.3	7851.56	35188.4	7854.39	31019.4	13509.7	32078.2	7223.37	30585.4	6658.73	29037.5	14560.6	29771.8	6806.38	30547.2	6467.56	31741.1	11747.5	22554.9
0		3996.42	23539.9	5208.92	30800	5208.92	30223.1	3568.35	25200.2	4776.17	18866.7	9674.43	23700.3	6201.87	25758.7	6498.54	30664	2967.71	25360.4	4879.7	32084	8345.14	27485.2	7988.1	40870.2	7798	32377	13744.9	36710	7427.52	31306.6	7195.66	29804.2	15018.5	36212.2	6980.46	37683.8	7246.9	36506.8	11383.5	22754.7
0.0649351		4105.16	18008.5	4589.1	28651.1	4589.1	28074.2	3143.57	23735.9	4429.13	16419.5	10560.2	23592.4	5928.35	22348.3	6707.88	27764.6	2812.8	19425.5	4612.45	27503.4	7891.07	20755.1	7548.45	35487.6	7092.82	27827.2	13443.9	34595.9	7111.46	26080.8	7211.54	24759.5	14657.4	34729.4	6737.67	36940.3	7555.45	31061.8	11013.1	18636.8
0.12987		3925.75	11895.9	3927.38	21912.2	3927.38	21335.2	2763.33	18929.1	4259.46	13159.7	10351	19925.5	5429.43	14944.2	6368.55	20671	2590.64	12133.1	3935.18	18102.5	6879.26	11944	6974.46	24617	6579.16	19562.8	12498.2	26035.7	6400.23	17574.5	6991.1	16421.2	13563.2	25537.3	6268.51	27708.3	7401.84	21168.5	11034.8	13042.8
0.194805		3596.3	6930.57	3272.59	13741.8	3272.59	13164.9	2409.21	13789.4	4132.05	10083.4	9902.76	14842.1	4745.42	8311.47	5818.04	13829.1	2292.14	7176.36	3412.9	9578.51	5919.84	5510.91	6752.54	14568.5	5992.68	12888.6	11961.6	16002.3	5462.65	9526.24	6702.47	9318.32	12269.7	15520	5711.45	16939.9	6937.18	11699.8	10328.3	8587.53
0.25974		3270.77	4349.02	2593.06	7958.37	2593.06	7381.43	2318.94	9487.74	3792.64	7319.12	9212.85	11180.9	4354.75	4503.06	5409.87	8748.73	2273.22	4551.47	3071.11	5340.67	5215.75	2320.43	6551.86	8431.01	5372.24	8936.88	10777.9	9449.72	4477.27	4355.29	5970.87	4784.24	11036.8	8125.18	5255.24	8932.17	6405.57	5598.27	9667.62	5843.49
0.324675		3008.78	2872.6	2109.12	4735.79	2109.12	4158.85	2250.15	6008.27	3531.33	4863.49	8587.31	9295.35	3693.7	2787.42	4868.01	5583.32	2097.39	3196.94	2512.73	3211.32	4553.46	1178.94	6295.07	5474.67	5050.75	6149.75	9512.93	5667.21	3890.7	2061.3	5344.22	2740.02	10181.2	4660.36	4413.86	4900.24	5795.47	2713.59	8897.55	4311.09
0.38961		2663.34	2011.41	1697.14	3123.2	1697.14	2546.27	2214.01	3627.76	3376.25	3238.14	7985.72	8084.85	3276.99	1917.83	4382.12	3805.63	1841.48	2354.01	2144.54	2231.04	3962.53	747.085	5680.12	3727.36	4497.56	4116.64	8481.46	3694.4	3252.54	1242.26	4980.38	1901.82	9357.57	3090.48	3730.37	3224.12	5311.5	1548.71	8079.9	3331.78
0.454545		2373.46	1377.92	1459.67	2133.75	1459.67	1556.81	2169.65	2190.4	3290.23	2197.47	7499.02	7076.63	2831.46	1336.49	3913.49	2636.09	1574.84	1765.74	1881.78	1612.51	3626.37	609.52	4902.59	2472.25	3937.63	2600.19	7622.62	2621.15	2892.18	918.525	4739.91	1203.12	8670.67	2332.62	3267.68	2309.65	4704.85	1077.01	7363.19	2444.83
0.519481		2138.4	1096.13	1223.55	1516.57	1223.55	939.632	1961.73	1512.96	3171.23	1518.31	6852.51	6131.11	2731.05	959.996	3350.35	1985.81	1296.12	1423.75	1604.91	1272.23	3265.2	461.996	4469.46	1819.67	3587.04	1892.8	6932.5	2004.63	2558.22	717.929	4690.78	790.924	8153.96	1761.18	2852.41	1703.22	4393.3	808.606	6788.15	1807.9
0.584416		1904.42	880.373	1024.71	1221.08	1024.71	644.143	1593.13	1114.37	3008.02	1114.76	6336.52	5315.61	2787.07	709.605	2797.92	1540.4	1142.88	991.071	1355.21	1055.51	2672.21	289.033	3865.07	1481.88	3098.62	1540.51	6287.39	1508.89	2050.16	538.83	4269.92	582.95	7937.37	1311.42	2358.79	1228.04	3881.18	587.15	6219.57	1390.91
0.649351		1692.62	668.382	1005.41	1094.51	1005.41	517.571	1294.3	964.122	2846.95	818.92	5930.83	4738.78	2471.41	518.117	2407.62	1054.57	1003.79	807.183	1019.34	847.208	2390.05	192.672	3289.51	1194.29	2642	1323	5468.32	1090.97	1834.92	423.553	4042.33	400.393	7652.75	986.014	2132.22	831.818	3256.29	398.632	5698.58	1077.1
0.714286		1202.22	564.703	873.428	1047.11	873.428	470.168	984.894	865.334	2572.13	648.732	5683.49	4065.08	2116.88	383.978	2044.53	855.094	941.533	694.987	772.589	698.964	2096.42	149.887	2635.73	956.56	2367.09	1170.65	5012.72	981.495	1899.01	353.204	3684.67	234.988	7041.75	746.683	1791.32	638.572	2920.67	310.418	5333.97	860.94
0.779221		980.866	470.225	765.51	915.592	765.51	338.653	756.36	806.959	2333.29	533.568	5526.59	3342.65	1983.8	388.648	1778.85	625.419	943.551	483.102	667.744	520.905	1710.38	106.308	2088.95	822.778	2029.84	997.44	4333.56	805.002	1814.19	303.639	3479.73	160.946	6255.34	593.902	1401.13	467.318	2547.15	210.205	4886.51	644.826
0.844156		804.669	365.814	504.52	806.301	504.52	229.362	634.939	629.895	2223.37	451.126	4965.43	2852.82	1623.3	220.002	1418.15	507.46	819.314	323.336	707.208	441.417	1474.34	108.449	1660.18	662.431	1789.24	853.29	3715.93	749.369	1545.23	182.475	3343.53	122.056	5670.95	478.596	1162.27	309.143	2375.34	125.013	4409.14	543.636
0.909091		602.002	350.332	302.418	715	302.418	138.061	459.711	414.261	2116.24	352.558	4406.05	2312.73	1398.85	135.583	1216.77	416.454	745.214	238.367	477.75	439.464	1335.78	73.233	1522.64	620.407	1522.4	720.12	3181.02	704.428	1109.97	177.782	3229.73	38.427	5243.24	441.506	1029.76	289.484	1975.38	104.631	4170.87	370.436
0.974026		492.866	413.904	376.285	725.51	376.285	148.571	446.171	359.614	1993.71	282.617	4039.59	1919.28	1153.45	162.215	918.248	303.44	699.875	195.211	261.542	389.012	1112.33	58.911	942.241	554.256	1176.5	552.25	2622.14	600.924	940.978	161.242	2964.47	46.786	4428.84	384.111	954.158	181.799	1629.67	80.193	3830.41	313.36
1.03896		371.366	419.476	377.142	665.122	377.142	88.183	237.301	253.397	1855.69	187.458	3406.69	1702.55	933.188	86.505	611.13	196.052	497.02	173.306	370.637	329.202	864.212	69.717	703.816	427.833	1011.76	483.28	2359.8	585.218	759.14	134.309	2752.63	43.923	3925.75	318.997	613.613	60.762	1144.57	84.049	3479.55	249.665
1.1039		208.263	374.908	381.979	615.408	381.979	38.469	201.404	253.758	1569.04	44.744	3000.08	1639.95	698.54	13.865	426.103	244.007	349.706	196.829	360.161	236.75	739.047	21.938	588.948	334.822	811.08	423.59	2077.46	564.365	572.519	125.474	2504.97	27.952	3403.96	296.092	510.409	100.698	902.786	22.676	3151.1	243.98
1.16883		76.644	339.262	271.949	576.939	271.949	0	176.393	144.668	1540.87	101.097	2607.67	1542.39	555.561	25.663	315.993	191.193	147.908	113.857	124.577	178.411	430.894	32.789	328.304	288.023	639.52	381.64	1692.58	434.58	324.628	57.647	2236.39	23.807	2894.67	265.026	369.257	72.514	494.903	1.872	2869.18	211.621
1.23377		0	254.919	135.683	591.485	135.683	14.546	103.706	79.642	1543.95	52.321	2292.27	1311.64	410.026	17.907	152.615	0	193.298	2.989	10.208	132.964	258.106	5.944	180.257	242.842	306.3	308.51	1373.88	344.308	152.28	34.38	1768.25	43.183	2212.81	228.264	179.676	46.093	403.206	3.275	2649.87	157.637
1.2987		43.05	204.313	0	0	0	14.326	0	0	0	0	2008.48	1157.43	0	0	0	4.093	0	0	0	0	0	0	0	252.029	194	306	1092.5	311.776	0	0	1590.4	0	1851.59	198.305	0	0	201.372	0	0	107.967
