# Supplementary material for: Molecular dissection of condensin II-mediated chromosome assembly using in vitro assays
Source: eLife journal article supplement (doi:10.7554/elife.78984), 2022-08-19
Supplement: supp [file Figure 3-source data 1.xlsx]

## Sheet: Figure 3B
Figure 3-source data 1
Figure 3B
	Raw DAPI and hCAP-H2 intensity values
		buffer
		DAPI (overall)	hCAP-H2 (overall)
Chromosome cluster
1		2354500762	3478079
2		444850583	42760
3		162818494	31661
4		124011126	489177
5		513266167	468424
6		64157925	1004
7		128583055	3104
8		259759710	66967
9		249976407	4033
10		356647383	80002
11		576514106	453249
12		223751528	0
13		433015093	62133
14		715417986	140078
15		635539474	242332
		holo(WT) 200 nM
		DAPI (overall)	hCAP-H2 (overall)
Chromosome cluster
1		607289113	9923571
2		732040249	14362313
3		178403017	3159076
4		702270188	28838558
5		95830441	3161115
6		510153550	17433157
7		258042810	11533462
8		780554743	39862856
9		739706131	53165214
10		578224656	22212177
11		439990996	22902448
12		636942441	16019548
13		629160591	25853003
14		680027138	14742359
15		202033713	9178572
		holo(SMC-TR) 200 nM
		DAPI (overall)	hCAP-H2 (overall)
Chromosome cluster
1		665186261	1517278
2		164443949	197797
3		802703331	6559140
4		591234205	7574503
5		1293621116	5421876
6		1107411651	6304667
7		389341393	8527682
8		177547792	2661737
9		716008999	2842014
10		44326376	99701
11		872028067	3213626
12		66407175	941026
13		772136932	5503173
14		842080497	7016436
15		164695785	45776
		ΔG2(WT) 200 nM
		DAPI (overall)	hCAP-H2 (overall)
Chromosome cluster
1		1221412254	678701662
2		1417440993	732691978
3		1694048557	641235851
4		2337493887	719930056
5		1516536691	699481383
6		1348148436	682544618
7		1540224223	773049331
8		1728034544	702679696
9		2089362605	730250034
10		2250497591	659177867
11		2426357800	679013967
12		2125977829	773377214
13		2355948482	871251096
14		5400147413	1678231109
15		2122086508	764628423
		ΔG2(SMC-TR) 200 nM
		DAPI (overall)	hCAP-H2 (overall)
Chromosome cluster
1		1230333962	195967119
2		1304577750	188832724
3		1022187332	180769997
4		823550862	224265555
5		434158753	73971912
6		947913231	183386866
7		1120806379	155126663
8		949538365	294797985
9		1198706602	175807454
10		1226162979	155922152
11		907767542	151516972
12		650215530	55646011
13		1019619778	99643847
14		1516816941	165125465
15		479462083	116383257
		ΔG2(WT) 25 nM
		DAPI (overall)	hCAP-H2 (overall)
Chromosome cluster
1		386019872	20016729
2		591245099	27235415
3		432113102	21352561
4		642420986	43823394
5		844774918	41225241
6		741759110	36746409
7		681710324	32924500
8		686348757	40055923
9		689856400	53145527
10		1358365893	111514621
11		653073634	56447533
12		674254964	59719324
13		674436646	40748578
14		695142059	55026400
15		636374624	42922710
		ΔG2(SMC-TR) 25 nM
		DAPI (overall)	hCAP-H2 (overall)
Chromosome cluster
1		1219021830	3143630
2		578274172	311085
3		376234773	115613
4		528619156	260559
5		132200597	148573
6		394632521	487842
7		699981580	309001
8		411058165	84845
9		319302572	270898
10		567197232	152264
11		592367221	250272
12		64299697	41886
13		1678390858	507745
14		257264565	291272
15		305854285	251541
