# Supplementary material for: Molecular dissection of condensin II-mediated chromosome assembly using in vitro assays
Source: eLife journal article supplement (doi:10.7554/elife.78984), 2022-08-19
Supplement: supp [file Figure 3-source data 2.xlsx]

## Sheet: ATPase assay readout
Figure 3-source data 1
Figure 3C and Figure 4-figure supplement 1C
Independent experiment #1
	Free phosphate conc (µM)													Calculation based on line of best fine from phosphate standard
Time (min)	ctrl -λDNA	ctrl +λDNA	holo(WT) -λDNA	holo(WT) +λDNA	holo(D3-dC) -λDNA	holo(D3-dC) +λDNA	ΔG2(WT) -λDNA	ΔG2(WT) +λDNA	holo(SMC-TR) -λDNA	holo(SMC-TR) +λDNA	ΔG2(SMC-TR) -λDNA	ΔG2(SMC-TR) +λDNA		y = ax - b
0	8.85991	4.82989	5.47917	27.801	5.14334	43.7867	9.17336	23.0098	6.19562	27.4428	7.60613	21.8903		223.89x - 40.172
2.5	10.8843	7.84808	13.3623	42.5188	24.6588	82.0564	33.9013	50.913	9.09828	29.9721	10.6387	24.3909		223.25x - 40.173
5	11.0076	8.57617	19.2166	56.1793	41.6128	111.322	56.2239	73.4449	9.51307	32.2662	11.3199	24.9718		223.07x - 40.41
7.5	11.0058	8.7609	24.8977	70.7075	58.0826	129.654	76.7088	90.6674	10.0501	33.344	11.606	25.7201		222.27x - 40.383
10	10.9691	8.5714	30.5726	84.8762	72.4881	140.379	92.1804	103.747	10.5473	34.0581	12.0792	25.755		222.01x - 40.293
12.5	10.8689	8.48676	36.4491	97.3161	83.758	145.939	102.192	113.167	11.1583	34.668	12.5609	26.03		222.63x - 40.336
15	11.2014	8.57918	42.1122	107.223	91.0895	148.067	107.445	118.667	11.9347	35.2011	13.1569	26.2234		222.22x - 39.887
17.5	11.1803	8.41966	47.9142	114.369	95.134	149.144	109.694	121.649	12.3825	35.5137	13.5624	26.3414		222.63x - 39.802
20	11.3775	8.40957	53.5974	119.092	97.5134	150.154	110.925	123.332	13.0734	36.0579	14.0776	26.6186		223.15x - 39.59
22.5	11.2169	8.46531	59.3817	121.953	99.135	151.013	111.394	124.325	13.5883	36.7199	14.5726	26.899		223.71x - 39.431
25	11.2999	8.50213	64.7929	123.008	99.7983	151.59	111.974	125.023	14.0752	37.1959	15.0153	27.0344		223.82x - 39.082
27.5	11.3332	8.50309	69.9564	123.93	100.795	152.321	112.632	125.458	14.6125	37.5676	15.4435	27.2805		224.61x - 38.957
30	11.3381	8.5264	74.8612	124.505	101.404	152.713	112.966	125.9	15.1396	38.0385	15.837	27.3989		224.94x - 38.711
32.5	11.3788	8.65179	79.3053	125.078	102.248	152.979	113.697	125.934	15.6157	38.4006	16.3369	27.7181		225.37x - 38.428
35	11.4314	8.6968	83.4576	125.584	102.848	153.156	114.239	126.217	16.087	38.5288	16.6746	27.8616		226x - 38.266
37.5	11.4219	8.6586	86.7558	125.963	103.517	153.347	114.525	126.62	16.4729	38.3981	17.0164	28.0923		226.5x - 38.091
40	11.486	8.71348	89.4817	126.23	104.117	153.637	115.162	126.571	16.9403	38.6891	17.4403	28.3715		227.26x - 37.943
42.5	11.6084	8.81392	91.4884	126.566	104.552	153.807	115.321	126.521	17.3335	38.6894	17.7652	28.3977		227.19x - 37.601
45	11.582	8.87084	93.2819	127.115	104.878	154.431	116.202	127.137	17.7334	38.8533	18.1663	28.5781		227.83x - 37.447
47.5	11.5933	8.87574	94.5145	127.468	105.636	154.987	116.369	127.423	18.0791	38.9064	18.5586	28.7439		228.37x - 37.255
50	11.7282	9.00544	95.4003	127.776	105.925	155.575	116.908	127.684	18.5235	39.3214	18.9125	28.9339		228.8x - 37.052
52.5	11.6713	9.17233	96.1536	128.64	106.379	156.495	117.383	128.296	18.8242	39.8244	19.2139	29.4848		229.26x - 36.886
55	11.7792	9.13821	96.8645	128.993	107.015	156.987	117.9	128.993	19.2658	40.4625	19.6562	30.266		229.65x - 36.654
57.5	11.9095	9.23418	97.5424	129.462	107.483	157.921	118.576	129.761	19.5664	41.1534	19.9354	30.6828		230.63x - 36.592
60	11.8234	9.30955	98.0329	129.906	107.858	158.55	118.905	130.344	20.0569	41.5286	20.3337	31.081		230.63x - 36.286
	Absorbance 360 nm
Time (min)	ctrl -λDNA	ctrl +λDNA	holo(WT) -λDNA	holo(WT) +λDNA	holo(D3-dC) -λDNA	holo(D3-dC) +λDNA	ΔG2(WT) -λDNA	ΔG2(WT) +λDNA	holo(SMC-TR) -λDNA	holo(SMC-TR) +λDNA	ΔG2(SMC-TR) -λDNA	ΔG2(SMC-TR) +λDNA
0	0.219	0.201	0.2039	0.3036	0.2024	0.375	0.2204	0.2822	0.2071	0.302	0.2134	0.2772
2.5	0.2287	0.2151	0.2398	0.3704	0.2904	0.5475	0.3318	0.408	0.2207	0.3142	0.2276	0.2892
5	0.2305	0.2196	0.2673	0.433	0.3677	0.6802	0.4332	0.5104	0.2238	0.3258	0.2319	0.2931
7.5	0.2312	0.2211	0.2937	0.4998	0.443	0.765	0.5268	0.5896	0.2269	0.3317	0.2339	0.2974
10	0.2309	0.2201	0.3192	0.5638	0.508	0.8138	0.5967	0.6488	0.229	0.3349	0.2359	0.2975
12.5	0.23	0.2193	0.3449	0.6183	0.5574	0.8367	0.6402	0.6895	0.2313	0.3369	0.2376	0.2981
15	0.2299	0.2181	0.369	0.662	0.5894	0.8458	0.663	0.7135	0.2332	0.3379	0.2387	0.2975
17.5	0.229	0.2166	0.394	0.6925	0.6061	0.8487	0.6715	0.7252	0.2344	0.3383	0.2397	0.2971
20	0.2284	0.2151	0.4176	0.7111	0.6144	0.8503	0.6745	0.7301	0.236	0.339	0.2405	0.2967
22.5	0.2264	0.2141	0.4417	0.7214	0.6194	0.8513	0.6742	0.732	0.237	0.3404	0.2414	0.2965
25	0.2251	0.2126	0.4641	0.7242	0.6205	0.8519	0.6749	0.7332	0.2375	0.3408	0.2417	0.2954
27.5	0.2239	0.2113	0.4849	0.7252	0.6222	0.8516	0.6749	0.732	0.2385	0.3407	0.2422	0.2949
30	0.2225	0.21	0.5049	0.7256	0.6229	0.851	0.6743	0.7318	0.2394	0.3412	0.2425	0.2939
32.5	0.221	0.2089	0.5224	0.7255	0.6242	0.8493	0.675	0.7293	0.2398	0.3409	0.243	0.2935
35	0.2199	0.2078	0.5386	0.725	0.6244	0.847	0.6748	0.7278	0.2405	0.3398	0.2431	0.2926
37.5	0.2186	0.2064	0.5512	0.7243	0.6252	0.8452	0.6738	0.7272	0.2409	0.3377	0.2433	0.2922
40	0.2175	0.2053	0.5607	0.7224	0.6251	0.843	0.6737	0.7239	0.2415	0.3372	0.2437	0.2918
42.5	0.2166	0.2043	0.5682	0.7226	0.6257	0.8425	0.6731	0.7224	0.2418	0.3358	0.2437	0.2905
45	0.2152	0.2033	0.5738	0.7223	0.6247	0.8422	0.6744	0.7224	0.2422	0.3349	0.2441	0.2898
47.5	0.2139	0.202	0.577	0.7213	0.6257	0.8418	0.6727	0.7211	0.2423	0.3335	0.2444	0.289
50	0.2132	0.2013	0.5789	0.7204	0.6249	0.8419	0.6729	0.72	0.2429	0.3338	0.2446	0.2884
52.5	0.2118	0.2009	0.5803	0.722	0.6249	0.8435	0.6729	0.7205	0.243	0.3346	0.2447	0.2895
55	0.2109	0.1994	0.5814	0.7213	0.6256	0.8432	0.673	0.7213	0.2435	0.3358	0.2452	0.2914
57.5	0.2103	0.1987	0.5816	0.72	0.6247	0.8434	0.6728	0.7213	0.2435	0.3371	0.2451	0.2917
60	0.2086	0.1977	0.5824	0.7206	0.625	0.8448	0.6729	0.7225	0.2443	0.3374	0.2455	0.2921
Independent experiment #2
	Free phosphate conc (µM)													Calculation based on line of best fine from phosphate standard
Time (min)	ctrl -λDNA	ctrl +λDNA	holo(WT) -λDNA	holo(WT) +λDNA	holo(D3-dC) -λDNA	holo(D3-dC) +λDNA	ΔG2(WT) -λDNA	ΔG2(WT) +λDNA	holo(SMC-TR) -λDNA	holo(SMC-TR) +λDNA	ΔG2(SMC-TR) -λDNA	ΔG2(SMC-TR) +λDNA		y = ax - b
0	6.73624	4.8377	8.78931	31.2848	8.39194	37.4881	8.21533	16.847	8.36986	26.6929	12.763	16.847		220.76x - 42.714
2.5	9.1543	6.80522	17.4749	47.3104	27.7493	75.1041	31.8547	45.3125	10.3398	28.2982	14.5989	18.1774		219.54x - 42.723
5	9.4689	6.8847	23.4192	62.3355	45.3849	106.245	54.2325	69.6063	10.8486	28.8285	14.8563	18.3384		219x - 42.894
7.5	9.47237	6.85241	29.3841	78.6175	63.5309	128.331	75.146	90.189	11.4155	29.4496	15.4546	18.6641		218.33x - 42.774
10	9.56672	6.94904	35.3509	95.3394	81.1385	142.785	92.4599	107.032	11.9663	30.0719	16.0891	19.0122		218.14x - 42.656
12.5	9.77764	7.02681	41.434	111.711	96.8655	151.707	104.987	117.3	12.4411	30.7582	16.7202	19.3401		218.32x - 42.51
15	9.76625	7.21015	47.496	125.293	109.214	156.185	112.119	123.742	12.9122	31.3074	17.3909	19.6848		218.47x - 42.317
17.5	9.86314	7.23586	53.8044	135.776	117.625	158.48	116.202	127.872	13.4319	31.9104	18.0734	20.022		218.94x - 42.157
20	9.97157	7.36606	59.6075	142.94	122.687	159.405	117.914	129.124	13.8908	32.3921	18.8171	20.4374		218.95x - 41.832
22.5	10.0765	7.38066	65.7456	147.321	125.272	160.339	119.07	129.809	14.3941	32.8701	19.435	20.7281		219.17x - 41.56
25	10.0823	7.53602	71.7866	149.669	126.971	161.083	119.706	130.637	14.736	33.4382	19.9822	21.1017		219.51x - 41.283
27.5	10.1382	7.62842	77.6613	150.931	127.77	161.674	120.438	131.006	15.1139	33.9155	20.5518	21.4765		220.16x - 41.115
30	10.2299	7.71902	83.2648	151.674	128.504	161.938	120.729	131.566	15.4718	34.3693	21.2203	21.7049		220.25x - 40.758
32.5	10.2498	7.86451	88.7655	152.285	129.117	162.378	121.497	131.811	15.9038	34.699	21.8008	22.1321		220.86x - 40.548
35	10.3637	7.95153	94.1258	152.815	129.644	163.149	121.766	132.211	16.3831	34.8616	22.4245	22.5352		221.3x - 40.314
37.5	10.3555	8.09424	98.7433	153.523	129.935	163.299	122.553	132.418	16.6293	35.2513	22.8366	22.7479		221.69x - 40.079
40	10.4865	8.18105	103.082	153.537	130.149	163.246	122.501	132.721	17.0926	35.6694	23.4105	23.0779		221.68x - 39.724
42.5	10.5343	8.1977	107.224	154.088	130.611	164.035	123.29	133.215	17.4327	36.1697	23.797	23.3742		222.53x - 39.624
45	10.6034	8.35175	110.481	154.578	131.013	164.387	123.857	133.822	17.8713	36.7097	24.2028	23.6231		222.94x - 39.402
47.5	10.7234	8.44394	113.301	155.427	131.581	164.925	124.385	134.375	18.3218	37.4516	24.8027	24.0652		223.48x - 39.202
50	10.7736	8.60453	115.361	155.724	131.931	165.094	124.596	134.816	18.7122	38.0776	25.2419	24.571		223.62x - 38.87
52.5	10.888	8.64642	117.252	156.278	132.248	165.827	125.053	135.588	19.0026	38.6614	25.7498	24.9204		224.16x - 38.741
55	10.9148	8.75704	118.377	156.925	132.83	166.096	125.57	136.426	19.4786	39.3932	26.1542	25.4125		224.77x - 38.602
57.5	11.0951	8.84806	119.221	157.15	132.927	166.093	125.782	136.86	19.7685	40.1488	26.6892	25.8578		224.7x - 38.294
60	11.3023	9.05186	119.974	158.163	133.589	166.602	126.253	137.685	20.2138	40.985	27.1226	26.4925		225.04x - 38.004
	Absorbance 360 nm
Time (min)	ctrl -λDNA	ctrl +λDNA	holo(WT) -λDNA	holo(WT) +λDNA	holo(D3-dC) -λDNA	holo(D3-dC) +λDNA	ΔG2(WT) -λDNA	ΔG2(WT) +λDNA	holo(SMC-TR) -λDNA	holo(SMC-TR) +λDNA	ΔG2(SMC-TR) -λDNA	ΔG2(SMC-TR) +λDNA
0	0.224	0.2154	0.2333	0.3352	0.2315	0.3633	0.2307	0.2698	0.2314	0.3144	0.2513	0.2698
2.5	0.2363	0.2256	0.2742	0.4101	0.321	0.5367	0.3397	0.401	0.2417	0.3235	0.2611	0.2774
5	0.2391	0.2273	0.3028	0.4805	0.4031	0.681	0.4435	0.5137	0.2454	0.3275	0.2637	0.2796
7.5	0.2393	0.2273	0.3305	0.556	0.4869	0.7837	0.5401	0.609	0.2482	0.3308	0.2667	0.2814
10	0.2394	0.2274	0.3576	0.6326	0.5675	0.8501	0.6194	0.6862	0.2504	0.3334	0.2693	0.2827
12.5	0.2395	0.2269	0.3845	0.7064	0.6384	0.8896	0.6756	0.732	0.2517	0.3356	0.2713	0.2833
15	0.2384	0.2267	0.4111	0.7672	0.6936	0.9086	0.7069	0.7601	0.2528	0.337	0.2733	0.2838
17.5	0.2376	0.2256	0.4383	0.8127	0.7298	0.9164	0.7233	0.7766	0.2539	0.3383	0.2751	0.284
20	0.2366	0.2247	0.4633	0.8439	0.7514	0.9191	0.7296	0.7808	0.2545	0.339	0.277	0.2844
22.5	0.2356	0.2233	0.4896	0.8618	0.7612	0.9212	0.7329	0.7819	0.2553	0.3396	0.2783	0.2842
25	0.234	0.2224	0.5151	0.8699	0.7665	0.9219	0.7334	0.7832	0.2552	0.3404	0.2791	0.2842
27.5	0.2328	0.2214	0.5395	0.8723	0.7671	0.9211	0.7338	0.7818	0.2554	0.3408	0.2801	0.2843
30	0.2315	0.2201	0.5631	0.8737	0.7685	0.9203	0.7332	0.7824	0.2553	0.3411	0.2814	0.2836
32.5	0.23	0.2192	0.5855	0.8731	0.7682	0.9188	0.7337	0.7804	0.2556	0.3407	0.2823	0.2838
35	0.229	0.2181	0.6075	0.8727	0.768	0.9194	0.7324	0.7796	0.2562	0.3397	0.2835	0.284
37.5	0.2275	0.2173	0.6262	0.8733	0.7669	0.9174	0.7336	0.7781	0.2558	0.3398	0.2838	0.2834
40	0.2265	0.2161	0.6442	0.8718	0.7663	0.9156	0.7318	0.7779	0.2563	0.3401	0.2848	0.2833
42.5	0.2254	0.2149	0.6599	0.8705	0.765	0.9152	0.7321	0.7767	0.2564	0.3406	0.285	0.2831
45	0.2243	0.2142	0.6723	0.8701	0.7644	0.9141	0.7323	0.777	0.2569	0.3414	0.2853	0.2827
47.5	0.2234	0.2132	0.6824	0.8709	0.7642	0.9134	0.732	0.7767	0.2574	0.343	0.2864	0.2831
50	0.222	0.2123	0.6897	0.8702	0.7638	0.9121	0.731	0.7767	0.2575	0.3441	0.2867	0.2837
52.5	0.2214	0.2114	0.6959	0.87	0.7628	0.9126	0.7307	0.7777	0.2576	0.3453	0.2877	0.284
55	0.2203	0.2107	0.6984	0.8699	0.7627	0.9107	0.7304	0.7787	0.2584	0.347	0.2881	0.2848
57.5	0.2198	0.2098	0.701	0.8698	0.762	0.9096	0.7302	0.7795	0.2584	0.3491	0.2892	0.2855
60	0.2191	0.2091	0.702	0.8717	0.7625	0.9092	0.7299	0.7807	0.2587	0.351	0.2894	0.2866
Independent experiment #3
	Free phosphate conc (µM)													Calculation based on line of best fine from phosphate standard
Time (min)	ctrl -λDNA	ctrl +λDNA	holo(WT) -λDNA	holo(WT) +λDNA	holo(D3-dC) -λDNA	holo(D3-dC) +λDNA	ΔG2(WT) -λDNA	ΔG2(WT) +λDNA	holo(SMC-TR) -λDNA	holo(SMC-TR) +λDNA	ΔG2(SMC-TR) -λDNA	ΔG2(SMC-TR) +λDNA		y = ax - b
0	9.08574	3.57269	15.2432	18.4651	7.96404	31.7584	2.37939	16.9377	5.6729	24.6702	5.8877	7.24806		238.66x - 47.954
2.5	11.2511	6.60642	24.6612	34.4747	30.9733	71.8705	28.901	49.0042	7.41627	26.5667	8.67868	9.94108		238.19x - 48.082
5	11.5418	6.81381	31.3331	50.3878	51.7183	102.586	52.3361	74.2181	7.90672	26.8664	9.0234	10.3301		237.59x - 48.117
7.5	11.5201	7.11004	37.7671	66.717	72.028	124.214	73.5217	95.5958	8.39038	27.6666	9.50475	10.548		237.1x - 47.992
10	11.7092	7.39125	44.3785	83.5722	90.0017	136.289	90.144	111.188	8.98083	28.3879	10.1671	10.9025		237.25x - 47.888
12.5	12.0201	7.50915	51.1469	98.5835	103.641	142.577	100.269	121.257	9.55096	29.0431	10.5006	11.3316		237.42x - 47.691
15	12.1399	7.63736	57.7848	111.005	113.126	145.93	105.383	126.871	10.115	29.7689	10.9488	11.7587		238.23x - 47.632
17.5	12.3485	7.772	64.454	120.349	118.347	147.213	107.788	129.55	10.68	30.4639	11.5381	11.9671		238.36x - 47.313
20	12.4695	7.81387	71.1065	126.114	120.886	148.247	108.901	131.391	11.1564	31.092	11.9442	12.2546		238.75x - 47.027
22.5	12.6512	7.98561	77.8735	129.793	122.495	149.197	110.126	132.592	11.7659	31.8159	12.4358	12.6751		239.26x - 46.781
25	12.7301	8.08437	84.2358	131.723	123.629	149.611	110.578	133.638	12.299	32.3666	12.9696	13.0653		239.47x - 46.419
27.5	12.7429	8.17382	90.4661	133.296	124.686	150.562	111.532	134.955	12.7189	32.9433	13.272	13.272		240.48x - 46.343
30	12.8662	8.2434	96.3411	133.949	125.306	150.683	111.967	135.731	13.2514	33.5724	13.7089	13.7089		240.77x - 45.978
32.5	13.0899	8.28622	102.163	134.63	126.278	150.61	112.591	136.585	13.6692	34.1874	14.152	14.152		241.39x - 45.761
35	13.1156	8.44689	107.384	134.743	126.954	150.926	113.093	137.428	14.1557	34.814	14.5428	14.4944		241.9x - 45.521
37.5	13.2769	8.43514	111.735	135.121	127.519	150.881	113.575	137.614	14.56	35.2829	14.9958	14.8021		242.09x - 45.212
40	13.4264	8.57782	115.732	135.393	127.926	151.199	113.817	138.399	15.0507	35.8754	15.4143	15.2446		242.43x - 44.878
42.5	13.3992	8.56474	118.981	135.549	128.553	151.535	114.365	138.805	15.4642	36.1141	15.7558	15.3914		242.94x - 44.712
45	13.5135	8.51295	121.501	136.015	129.38	152.529	114.769	139.552	15.8065	36.4673	16.1236	15.5625		243.93x - 44.615
47.5	13.5459	8.74339	123.344	135.948	129.658	152.695	115.031	140.238	16.325	36.9244	16.52	15.9349		243.78x - 44.23
50	13.679	8.75896	124.736	136.754	130.537	153.302	115.826	141.038	16.5919	37.4717	17.008	16.2492		244.78x - 44.138
52.5	13.853	8.83196	125.909	136.71	130.954	154.173	115.891	141.78	17.0861	38.2726	17.3555	16.6452		244.93x - 43.779
55	13.9374	8.903	126.708	137.268	131.472	154.827	116.565	142.327	17.5229	39.0111	17.8176	16.9826		245.58x - 43.602
57.5	14.108	8.90892	127.624	137.899	132.232	155.862	116.807	143	18.0011	39.7582	18.346	17.5083		246.4x - 43.525
60	14.3254	9.01814	127.926	138.614	132.863	156.955	117.336	144.094	18.4725	40.5409	18.7934	18.1269		246.85x - 43.24
	Absorbance 360 nm
Time (min)	ctrl -λDNA	ctrl +λDNA	holo(WT) -λDNA	holo(WT) +λDNA	holo(D3-dC) -λDNA	holo(D3-dC) +λDNA	ΔG2(WT) -λDNA	ΔG2(WT) +λDNA	holo(SMC-TR) -λDNA	holo(SMC-TR) +λDNA	ΔG2(SMC-TR) -λDNA	ΔG2(SMC-TR) +λDNA
0	0.239	0.2159	0.2648	0.2783	0.2343	0.334	0.2109	0.2719	0.2247	0.3043	0.2256	0.2313
2.5	0.2491	0.2296	0.3054	0.3466	0.3319	0.5036	0.3232	0.4076	0.233	0.3134	0.2383	0.2436
5	0.2511	0.2312	0.3344	0.4146	0.4202	0.6343	0.4228	0.5149	0.2358	0.3156	0.2405	0.246
7.5	0.251	0.2324	0.3617	0.4838	0.5062	0.7263	0.5125	0.6056	0.2378	0.3191	0.2425	0.2469
10	0.2512	0.233	0.3889	0.5541	0.5812	0.7763	0.5818	0.6705	0.2397	0.3215	0.2447	0.2478
12.5	0.2515	0.2325	0.4163	0.6161	0.6374	0.8014	0.6232	0.7116	0.2411	0.3232	0.2451	0.2486
15	0.2509	0.232	0.4425	0.6659	0.6748	0.8125	0.6423	0.7325	0.2424	0.3249	0.2459	0.2493
17.5	0.2503	0.2311	0.4689	0.7034	0.695	0.8161	0.6507	0.742	0.2433	0.3263	0.2469	0.2487
20	0.2492	0.2297	0.4948	0.7252	0.7033	0.8179	0.6531	0.7473	0.2437	0.3272	0.247	0.2483
22.5	0.2484	0.2289	0.521	0.738	0.7075	0.8191	0.6558	0.7497	0.2447	0.3285	0.2475	0.2485
25	0.247	0.2276	0.5456	0.7439	0.7101	0.8186	0.6556	0.7519	0.2452	0.329	0.248	0.2484
27.5	0.2457	0.2267	0.5689	0.747	0.7112	0.8188	0.6565	0.7539	0.2456	0.3297	0.2479	0.2479
30	0.2444	0.2252	0.5911	0.7473	0.7114	0.8168	0.656	0.7547	0.246	0.3304	0.2479	0.2479
32.5	0.2438	0.2239	0.6128	0.7473	0.7127	0.8135	0.656	0.7554	0.2462	0.3312	0.2482	0.2482
35	0.2424	0.2231	0.6321	0.7452	0.713	0.8121	0.6557	0.7563	0.2467	0.3321	0.2483	0.2481
37.5	0.2416	0.2216	0.6483	0.7449	0.7135	0.81	0.6559	0.7552	0.2469	0.3325	0.2487	0.2479
40	0.2405	0.2205	0.6625	0.7436	0.7128	0.8088	0.6546	0.756	0.2472	0.3331	0.2487	0.248
42.5	0.2392	0.2193	0.6738	0.742	0.7132	0.8078	0.6548	0.7554	0.2477	0.3327	0.2489	0.2474
45	0.2383	0.2178	0.681	0.7405	0.7133	0.8082	0.6534	0.755	0.2477	0.3324	0.249	0.2467
47.5	0.237	0.2173	0.6874	0.7391	0.7133	0.8078	0.6533	0.7567	0.2484	0.3329	0.2492	0.2468
50	0.2362	0.2161	0.6899	0.739	0.7136	0.8066	0.6535	0.7565	0.2481	0.3334	0.2498	0.2467
52.5	0.2353	0.2148	0.6928	0.7369	0.7134	0.8082	0.6519	0.7576	0.2485	0.335	0.2496	0.2467
55	0.2343	0.2138	0.6935	0.7365	0.7129	0.808	0.6522	0.7571	0.2489	0.3364	0.2501	0.2467
57.5	0.2339	0.2128	0.6946	0.7363	0.7133	0.8092	0.6507	0.757	0.2497	0.338	0.2511	0.2477
60	0.2332	0.2117	0.6934	0.7367	0.7134	0.811	0.6505	0.7589	0.25	0.3394	0.2513	0.2486

## Sheet: Phosphate conc. standard
Figure 3-source data 1
Figure 3C and Figure 4-figure supplement 1C
Independent experiment #1
		Absorbance 360 nm												Line of best fit
		0	10	20	30	40	50	75	100	150	: Phosphate conc (µM)
Time (min)														y = ax - b
0		0.1828	0.2219	0.2683	0.3137	0.3526	0.4071	0.5145	0.6261	0.7422				223.89x - 40.172
2.5		0.1817	0.2229	0.2696	0.3151	0.3539	0.4086	0.5169	0.6267	0.747				223.25x - 40.173
5		0.1832	0.2244	0.2706	0.3164	0.3549	0.4101	0.5178	0.6288	0.7488				223.07x - 40.41
7.5		0.1842	0.2253	0.2714	0.3165	0.3559	0.4111	0.5206	0.6306	0.7547				222.27x - 40.383
10		0.184	0.2249	0.2714	0.3166	0.3562	0.4112	0.5206	0.631	0.7542				222.01x - 40.293
12.5		0.1838	0.2244	0.2707	0.3157	0.3553	0.4109	0.5191	0.6294	0.7549				222.63x - 40.336
15		0.1829	0.2227	0.2691	0.3139	0.3538	0.4089	0.5183	0.6289	0.7533				222.22x - 39.887
17.5		0.1821	0.2216	0.2683	0.3132	0.3531	0.4076	0.5167	0.6274	0.7516				222.63x - 39.802
20		0.181	0.2203	0.2664	0.3113	0.3509	0.4061	0.5151	0.6247	0.7512				223.15x - 39.59
22.5		0.1804	0.2186	0.2651	0.31	0.3491	0.4041	0.5127	0.6229	0.7487				223.71x - 39.431
25		0.1791	0.2169	0.2633	0.308	0.3475	0.402	0.5111	0.6211	0.746				223.82x - 39.082
27.5		0.178	0.2156	0.2622	0.3059	0.3458	0.3997	0.5088	0.6185	0.7431				224.61x - 38.957
30		0.177	0.214	0.2604	0.3044	0.3441	0.3983	0.5069	0.6165	0.7415				224.94x - 38.711
32.5		0.1756	0.2127	0.2585	0.3026	0.3417	0.396	0.5046	0.6144	0.7392				225.37x - 38.428
35		0.1749	0.2112	0.257	0.3005	0.3403	0.394	0.5027	0.612	0.7365				226x - 38.266
37.5		0.1735	0.2097	0.2558	0.2993	0.3389	0.3925	0.5011	0.6095	0.7336				226.5x - 38.091
40		0.1728	0.2084	0.254	0.2971	0.337	0.3908	0.4986	0.607	0.7322				227.26x - 37.943
42.5		0.1718	0.2072	0.2526	0.2956	0.3351	0.389	0.4968	0.6064	0.7302				227.19x - 37.601
45		0.1709	0.2055	0.251	0.2942	0.3336	0.3872	0.4956	0.6034	0.7269				227.83x - 37.447
47.5		0.1699	0.2044	0.2495	0.2922	0.3321	0.3852	0.4935	0.6014	0.7262				228.37x - 37.255
50		0.1687	0.2032	0.2483	0.2908	0.3302	0.3839	0.4912	0.5997	0.722				228.8x - 37.052
52.5		0.1681	0.202	0.2468	0.2895	0.3287	0.3819	0.49	0.5977	0.721				229.26x - 36.886
55		0.1669	0.2007	0.2454	0.288	0.3269	0.3803	0.4881	0.5958	0.7178				229.65x - 36.654
57.5		0.1661	0.1996	0.2442	0.2864	0.3251	0.3784	0.4853	0.5934	0.7164				230.63x - 36.592
60		0.1649	0.1983	0.243	0.2848	0.3239	0.3767	0.484	0.5922	0.7137				230.63x - 36.286
Independent experiment #2
		Absorbance 360 nm												Line of best fit
		0	10	20	30	40	50	75	100	150	: Phosphate conc (µM)
Time (min)														y = ax - b
0		0.1987	0.2356	0.286	0.3349	0.3697	0.4268	0.5087	0.6597	0.7781				220.76x - 42.714
2.5		0.2012	0.2366	0.2876	0.3371	0.371	0.4284	0.5109	0.6644	0.7877				219.54x - 42.723
5		0.2032	0.2379	0.2889	0.3384	0.3725	0.4305	0.5122	0.6673	0.7948				219x - 42.894
7.5		0.2032	0.2381	0.2896	0.3388	0.3734	0.4305	0.5133	0.669	0.7994				218.33x - 42.774
10		0.2033	0.238	0.289	0.3383	0.3727	0.4304	0.5134	0.6692	0.8001				218.14x - 42.656
12.5		0.2025	0.2371	0.2879	0.3372	0.3721	0.4293	0.5124	0.6679	0.8041				218.32x - 42.51
15		0.2022	0.2355	0.2867	0.3363	0.3708	0.4281	0.5108	0.6668	0.7924				218.47x - 42.317
17.5		0.2008	0.2343	0.2855	0.3346	0.3692	0.4265	0.5096	0.6643	0.7905				218.94x - 42.157
20		0.1999	0.2329	0.2837	0.3328	0.3672	0.425	0.5084	0.6629	0.7891				218.95x - 41.832
22.5		0.1987	0.2315	0.2819	0.3312	0.3656	0.4235	0.5062	0.6612	0.7861				219.17x - 41.56
25		0.1976	0.2298	0.2801	0.3292	0.364	0.4211	0.5041	0.6592	0.785				219.51x - 41.283
27.5		0.1965	0.2282	0.2786	0.3274	0.362	0.4185	0.5026	0.6564	0.7818				220.16x - 41.115
30		0.1953	0.2265	0.2769	0.3255	0.3597	0.4171	0.5002	0.6549	0.7804				220.25x - 40.758
32.5		0.194	0.2249	0.2752	0.3233	0.3577	0.4149	0.4981	0.6521	0.7781				220.86x - 40.548
35		0.1928	0.2236	0.2732	0.3214	0.3559	0.4131	0.4961	0.6498	0.7754				221.3x - 40.314
37.5		0.192	0.2222	0.2719	0.3197	0.3537	0.4108	0.4938	0.6482	0.773				221.69x - 40.079
40		0.1908	0.2205	0.2703	0.3179	0.3522	0.4089	0.4923	0.6468	0.7695				221.68x - 39.724
42.5		0.1895	0.2193	0.2686	0.3161	0.3502	0.4073	0.4905	0.6435	0.7677				222.53x - 39.624
45		0.1886	0.2179	0.2672	0.314	0.3485	0.4056	0.4883	0.6416	0.7652				222.94x - 39.402
47.5		0.1873	0.2166	0.2653	0.3123	0.347	0.4036	0.4864	0.6391	0.7624				223.48x - 39.202
50		0.186	0.2152	0.2637	0.3109	0.3447	0.4015	0.4842	0.6377	0.76				223.62x - 38.87
52.5		0.185	0.2138	0.2624	0.3095	0.3436	0.4	0.4828	0.6353	0.7565				224.16x - 38.741
55		0.1844	0.2127	0.2607	0.3076	0.3421	0.3984	0.4809	0.6331	0.7555				224.77x - 38.602
57.5		0.1831	0.2116	0.2596	0.3062	0.3402	0.3974	0.4796	0.632	0.7525				224.7x - 38.294
60		0.1819	0.2102	0.258	0.3041	0.3382	0.3952	0.4775	0.6301	0.7513				225.04x - 38.004
Independent experiment #3
		Absorbance 360 nm												Line of best fit
		0	10	20	30	40	50	75	100	150	: Phosphate conc (µM)
Time (min)														y = ax - b
0		0.2118	0.2279	0.2876	0.3196	0.3709	0.4215	0.5133	0.6166	0.7626				238.66x - 47.954
2.5		0.2142	0.2291	0.2881	0.32	0.3714	0.4235	0.5135	0.6196	0.7717				238.19x - 48.082
5		0.2153	0.2302	0.2894	0.3205	0.3718	0.4242	0.5145	0.6222	0.7801				237.59x - 48.117
7.5		0.2159	0.2303	0.2894	0.3206	0.3715	0.424	0.5146	0.6238	0.784				237.1x - 47.992
10		0.2157	0.2296	0.2888	0.3196	0.3707	0.4231	0.5143	0.6228	0.7871				237.25x - 47.888
12.5		0.2144	0.2289	0.2878	0.3188	0.3693	0.4221	0.5129	0.6217	0.7873				237.42x - 47.691
15		0.2143	0.2275	0.2867	0.3167	0.3679	0.4205	0.5106	0.6196	0.7875				238.23x - 47.632
17.5		0.213	0.2261	0.2847	0.3156	0.3663	0.4182	0.5098	0.6177	0.7867				238.36x - 47.313
20		0.2117	0.2246	0.2831	0.3138	0.364	0.4167	0.5074	0.6158	0.7853				238.75x - 47.027
22.5		0.2108	0.223	0.281	0.3122	0.362	0.4147	0.5051	0.6137	0.7832				239.26x - 46.781
25		0.2095	0.2211	0.2791	0.3098	0.3609	0.4128	0.5031	0.6116	0.7823				239.47x - 46.419
27.5		0.2085	0.2199	0.2773	0.3084	0.3586	0.4108	0.5012	0.6085	0.7792				240.48x - 46.343
30		0.207	0.2181	0.2757	0.3063	0.3564	0.4086	0.4988	0.6066	0.7771				240.77x - 45.978
32.5		0.2059	0.2169	0.2738	0.3038	0.3549	0.4068	0.4967	0.6041	0.7747				241.39x - 45.761
35		0.205	0.2153	0.272	0.3024	0.3528	0.4044	0.4953	0.6018	0.7721				241.9x - 45.521
37.5		0.2038	0.2137	0.2703	0.3008	0.3516	0.4029	0.4932	0.6002	0.7697				242.09x - 45.212
40		0.2024	0.2125	0.2684	0.2987	0.3494	0.4006	0.4913	0.5983	0.7679				242.43x - 44.878
42.5		0.2015	0.2111	0.2669	0.2975	0.3482	0.3989	0.4899	0.5961	0.7663				242.94x - 44.712
45		0.2005	0.2099	0.2654	0.2955	0.3462	0.3972	0.4878	0.5931	0.7632				243.93x - 44.615
47.5		0.1991	0.2087	0.264	0.2944	0.3446	0.3954	0.4857	0.5927	0.7607				243.78x - 44.23
50		0.1985	0.2073	0.2627	0.2922	0.3427	0.3935	0.4835	0.5899	0.7584				244.78x - 44.138
52.5		0.197	0.2057	0.2611	0.2909	0.3407	0.3915	0.4817	0.5883	0.7551				244.93x - 43.779
55		0.1959	0.2046	0.2593	0.2892	0.3391	0.39	0.4798	0.5859	0.7528				245.58x - 43.602
57.5		0.1951	0.2034	0.2583	0.2876	0.3379	0.3885	0.4778	0.5836	0.7514				246.4x - 43.525
60		0.1941	0.2019	0.2563	0.2862	0.3355	0.3865	0.4758	0.5816	0.7477				246.85x - 43.24

## Sheet: Calculation
Figure 3-source data 1
Figure 3C and Figure 4-figure supplement 1C
2.5min-7.5min
Raw rate			Phosphate concentration (µM)				ATP per mole of condensin II per min
			Independent experiment					Independent experiment
		DNA	1st	2nd	3rd			1st	2nd	3rd	mean	SD
	holo(WT)	-	11.5353	11.9092	13.1058			11.5353	11.9092	13.1058	12.1835	0.820384
	holo(WT)	+	28.1887	31.3071	32.2423			28.1887	31.3071	32.2423	30.5794	2.12251
	holo(D3-dC)	-	33.4238	35.7815	41.0548			33.4238	35.7815	41.0548	36.7534	3.9072
	holo(D3-dC)	+	47.5972	53.2271	52.3432			47.5972	53.2271	52.3432	51.0558	3.02772
	ΔG2(WT)	-	42.8075	43.2913	44.6207			42.8075	43.2913	44.6207	43.5732	0.938918
	ΔG2(WT)	+	39.7544	44.8764	46.5915			39.7544	44.8764	46.5915	43.7408	3.55722
	holo(SMC-TR)	-	0.951788	1.07569	0.97411			0.951788	1.07569	0.97411	1.00053	0.0660399
	holo(SMC-TR)	+	3.37181	1.15137	1.09986			3.37181	1.15137	1.09986	1.87435	1.29709
	ΔG2(SMC-TR)	-	0.967253	0.855717	0.826073			0.967253	0.855717	0.826073	0.883014	0.0744433
	ΔG2(SMC-TR)	+	1.3292	0.486666	0.606906			1.3292	0.486666	0.606906	0.80759	0.455709
	control	-	0.121549	0.318067	0.268971			0.121549	0.318067	0.268971	0.236196	0.102277
	control	+	0.912822	0.047185	0.503616			0.912822	0.047185	0.503616	0.487874	0.433033
