# Supplementary material for: Molecular dissection of condensin II-mediated chromosome assembly using in vitro assays
Source: eLife journal article supplement (doi:10.7554/elife.78984), 2022-08-19
Supplement: supp [file Figure 4-figure supplement 3-source data 2.xlsx]

## Sheet: cond I holo(WT) 35 nM
Figure 4-figure supplement 3-source data 2
Figure 4-figure supplement 3D
Non-normalized values
	condensin I holo(WT) 35 nM
Chromosome sample		1		2		3		4		5		6		7		8		9		10		11		12		13		14		15		16		17		18		19		20
		DAPI	mSMC4	DAPI	mSMC4	DAPI	mSMC4	DAPI	mSMC4	DAPI	mSMC4	DAPI	mSMC4	DAPI	mSMC4	DAPI	mSMC4	DAPI	mSMC4	DAPI	mSMC4	DAPI	mSMC4	DAPI	mSMC4	DAPI	mSMC4	DAPI	mSMC4	DAPI	mSMC4	DAPI	mSMC4	DAPI	mSMC4	DAPI	mSMC4	DAPI	mSMC4	DAPI	mSMC4
Distance (µm)
-0.974026		0	56.62	0	0	1.051	0	0	124.312	0	0	1476.16	0	2.033	0	19.824	0	0	0	47.551	160.292	0	7.559	495.782	0	56.409	181.934	279.55	44.515	145.861	378.605	0	0	90.018	0	0	0	1329.41	0	0	0
-0.909091		397.647	7.004	282.099	95.446	196.833	104.867	326.409	139.629	234.166	58.302	1810.24	63.204	230.983	50.836	240.167	80.736	140.159	12.301	308.427	196.289	151.336	0	978.419	81.011	333	304.847	567.828	105.191	244.6	504.712	381.081	40.202	382.834	71.667	329.781	18.605	1524.59	109.288	254.748	12.735
-0.844156		747.239	0	632.216	243.694	387.348	39.904	601.199	122.835	579.804	120.472	2278.58	65.778	428.96	98.149	572.805	124.76	288.665	71.635	612.909	238.711	377.025	4.539	1638.02	251.348	774.619	299.832	972.874	163.922	503.785	532.22	765.261	93.438	680.363	111.57	655.172	73.633	2041.91	143.746	442.995	92.045
-0.779221		1162.74	54.023	1067.35	470.287	680.031	157.187	984.618	186.45	1030.76	203.415	2761.71	110	629.009	76.349	936.569	135.97	579.749	203.322	989.535	318.371	642.446	71.531	2344.22	434.931	1209.73	302.145	1358.01	218.656	945.408	617.455	1273.54	159.508	1000.59	107.978	1028.88	178.852	2393.66	292.112	851.327	156.867
-0.714286		1671.28	87.194	1557.4	784.458	937.695	296.57	1471.55	230.023	1559.55	249.019	3198.5	110.185	897.235	187.396	1260.26	302.505	878.937	329.342	1428.38	355.233	921.797	64.437	3115.34	739.753	1719.39	441.951	1736.95	360.47	1343.9	857.867	1797.19	416.95	1499.13	175.745	1313.84	206.938	2963.86	384.411	1272.95	252.089
-0.649351		2265.8	107.093	2058.11	1157.09	1246.29	385.408	1853.06	287.814	2069.57	339.783	3710.44	270.834	1271.37	310.232	1639.29	496.038	1189.23	537.159	1966.19	507.492	1254.03	116.986	3887.98	1147.66	2098.19	570.821	2375.49	469.43	1916.88	1058.43	2392.25	650.355	1992.97	266.705	1552.11	369.643	3573.97	512.172	1962.14	445.392
-0.584416		2918.68	130.804	2787.64	1685.26	1571.16	514.18	2409.13	478.214	2781.73	432.867	4439.85	326.111	1687.38	412.547	2073.71	712.006	1397.8	789.224	2508.83	579.211	1650.24	170.033	4560.61	1924.26	2508.34	550.891	2698.43	653.59	2499.93	1280.68	3307.16	1044.47	2505.09	373.371	1970.38	476.57	4395.76	607.382	2553.02	601.562
-0.519481		3596.51	209.401	3560.32	2747.75	2099.59	629.37	2975.33	747.14	3574.98	654.96	4931.71	545.667	2150.38	516.672	2604.98	944.735	1733.27	1346.6	2988.77	740.824	2242.63	256.846	5201.02	2603.32	3037.74	781.153	3197.41	815.887	3074.04	1811.08	4160.29	1574.77	3139.62	556.971	2323.92	526.746	5506.45	837.933	3339.69	1027.72
-0.454545		4377.55	399.622	4628.87	4144.97	2712.62	671.069	3622.76	1124.5	4709.09	978.263	5500.28	932.111	2716.61	846.75	3205.41	1685.78	2013.42	2483.88	3523.74	960.113	2841.74	477.786	5712.05	3467.46	3664.84	921.582	3692.82	973.807	3757.61	2627.96	5102.74	2075.85	3668.53	914.855	2969	762.875	6446.24	1085.83	4309.15	1287.66
-0.38961		5140.98	701.181	5675.5	5567.48	3369.28	803.095	4503.71	1927.34	5750.5	1685.99	6006.5	1158.72	3293.53	1486.99	3990.1	3049.29	2696.72	4127.63	4122.12	1278.38	3597.01	840.179	6235.45	4628.16	4562.83	1203.79	4256.08	1238.17	4278.8	3611.1	5836	3135.31	4228.72	1457.61	3623.93	1126.99	7110.7	1694.56	5339.48	1716.3
-0.324675		6118.29	1003.35	6983.13	6876.52	3784.59	1049.18	5520.71	3094.25	6874.13	3281.66	6712.29	2095.63	4104.39	2733.69	5008.14	4816.11	3349.14	5907.05	4684.72	1829.01	4267.88	1405.42	6648.43	6167.97	5330.75	1398.87	4790.23	1651.54	4806.94	4866.05	6693.79	4038.5	4668.89	2664.76	4377.51	1572	7732.62	2981.65	6553.92	2292.5
-0.25974		7110.66	1504.46	8148.43	9893.97	4312.24	1805.56	6504.25	4750.01	8291.3	5575.88	7060.16	3981.67	4983.73	4327	6107.76	6426.3	4052.74	7679.4	5151.12	2318.26	4977.95	2377.26	7036.37	8085.11	5793.22	2174.32	5570.58	2416.58	5371.67	6453.38	7326.77	4815.5	5457.13	4471.22	5226.41	2521.11	8589.44	4646.06	7689.89	3363.06
-0.194805		7717.94	2327.02	9123.56	15391.8	4495.48	3451.89	7562.5	7119.36	9479.43	8120.82	7570.93	7075	5592.45	6122.44	6862.07	8284.14	4832.13	9547.77	5553.76	3148.67	5649.78	3707.82	7464.09	10026	6631.03	4068.22	6426.28	3472.22	5960.62	9231.56	7892.25	5643.21	6598.13	7453.28	6096.5	4791.03	9193.29	6238.7	8816.48	4889.55
-0.12987		7862.93	3530.42	9758.74	21899	5136.41	5978.97	8295.79	9476.86	10583.9	10483.9	7628.33	11027.5	6083.48	7601.32	7301.12	10429.8	5567.02	11818.9	6052.89	4579.67	6249.11	5107.63	7616.15	11583.4	6991.74	6822.44	7134.39	4385	6669.01	12584.6	8343.29	6312.14	7259.43	11066.1	7175.88	8292.52	9303.28	7614.84	9891.56	6768.75
-0.0649351		7973.47	4726.55	10225	27282.9	5705.51	8295.85	8985.29	11431.7	11367.4	12320.6	7813.43	13926.4	6591.94	8812.08	7919.33	12425.2	6096.31	13846.6	6189.18	6231.11	6489.12	6350.76	7690.8	12584	7558.22	8942.41	7738.95	4946.42	7230.13	15021.3	8643.06	6646.82	7825.07	13695.8	7988.41	12346.1	9438.74	8840.66	10883.1	8696.91
0		8018.23	5165.91	10368.4	28029	5755	9204.29	9031.49	12241.2	11684.7	13200.2	7926.41	14097.1	6698.23	9137.36	8067.96	13564.9	6409.8	14140.4	6209.78	6984.64	6774.47	6699.21	7816.14	13593.2	7808.64	9165.23	8099.83	5249.85	7349.58	15834.8	8765.47	6699.03	7943.06	14704.8	8282.38	14160.5	9548.87	9387.51	11197.1	9816.91
0.0649351		7854.06	4418.63	10231.6	25844.4	5544.81	8045.05	8965.45	11675.1	11644.2	12887.2	7586.83	12007.7	6666.13	8591.35	7815.62	12209.3	6329.32	12149.5	6010.24	6230.15	6572.46	6575.45	7617.26	13525.4	7601.03	7232.26	8067.34	5042.28	7253.94	15474.2	8517.18	6232.36	7683.47	13413.9	8176	13613	9245.68	9182.83	10660.6	9506.73
0.12987		7436.44	3055.12	9687.07	22890.4	5350.02	5890.59	8848.12	10137.5	11411.2	10773.3	7150.46	8969.28	6377.26	7098.48	7653.02	9382.22	6230.87	8976.61	5636.86	4269.52	6268.25	6113.71	7444.22	12595.6	7205.39	4580.21	7875.65	4663.86	6896.52	13705.8	8160.57	5284.85	7363.74	10510.2	7654.73	10372.7	8381.86	7928.08	9771.26	8107.2
0.194805		6630.68	1774.81	8872.49	19587.5	4694.93	3742.29	8498.2	8303.7	10939.7	7841.8	6692.92	5862.56	5914.98	5360.84	6860.31	6592.26	5970.07	6625.47	5217.85	2382.9	6035.22	5516.28	7093.21	10725	6511.54	2385.59	7261.75	3979.58	6336.6	12046.1	7579.88	3737.64	7022.16	7477.22	7048.84	7143.62	7311.42	5660.79	8913.51	6140.13
0.25974		5722.3	1048.78	8054.34	16857.2	4114.24	2523.53	7538.48	6551.62	10107.4	5059.91	5706.72	3981.74	5040.67	3840.51	6459.89	4912.51	5485.21	5130.88	4807.37	1233.79	5768.01	5026.85	6662.86	8266.27	5710.42	1153.73	6777.38	2782.66	5619.43	10196.6	7008.46	2484.97	6541.76	4990.01	6372.4	4640.69	6541.8	3705.43	8031.05	4387.95
0.324675		4979.35	761.419	7079.57	14367.4	3678.6	1769.67	6400.28	5036.69	9003.5	3385.23	4947.8	2723.44	4441.98	2629.19	5415.73	3829.14	4936.18	4052.79	4294.05	792.397	5224.68	4227.3	6246.58	6539.6	4907.39	681.951	6068.94	1647.13	4804.85	7999.06	6369.03	1909.61	5959.75	3390.51	5566.25	3100.06	5699.28	2398.52	7105.37	3181.72
0.38961		4389.3	569.082	6016.33	11384.3	3170.11	1244.49	5418.37	3634.07	7873.14	2602.86	4085.05	2008.57	3793.37	1891.3	4527.16	2917.29	4249.08	2935.02	3736.63	516.361	4693.31	3347.53	5606.13	5159.37	3839.99	430.819	4920.11	948.298	4064.31	5905.33	5402.61	1425.96	5289.5	2426.27	4732	2278.73	4933.37	1728.13	6011.9	2416.4
0.454545		3730.61	415.957	5146.26	8922.79	2750.41	949.537	4442.95	2339.19	6697.56	2058.88	3387.42	1864.56	3049.16	1315.68	3655.66	2135.85	3499.47	1939.41	3119.61	396.228	4241.65	2535.41	4914.14	4202.1	2853.87	274.122	4037.99	646.229	3528.9	4171.32	4604.03	1097.04	4530.56	1804.45	3965.22	1796.46	3955.39	1455.05	5036	2062.14
0.519481		3014.27	332.143	4274.12	6571.15	2274.15	759.511	3537.98	1348.18	5410.39	1454.35	2736.63	1474.5	2352.28	912.892	2787.82	1499.75	2800.54	1390.4	2452.42	248.953	3758.89	1912.55	4241.55	3197.7	2108.55	201.736	3210.54	420.44	2870.13	2527.41	3865.18	826.206	3851.99	1362.66	3223.28	1388.78	3047.73	1100.67	4063.27	1764.27
0.584416		2455.05	289.584	3446.06	3929.23	1742.19	482.33	2798.57	916.58	4237.96	862.949	2200.83	1169.93	1813.53	674.84	2135.9	994.134	2289.97	966.616	1864.06	195.11	3323.79	1539.65	3570.13	2402.38	1677.04	125.521	2627.63	291.45	2151.12	1453.87	2905.08	602.454	2971.01	1002.77	2509.38	1105	2495.71	747.312	3345.31	1464.16
0.649351		1902.15	234.44	2627.49	2096.69	1299.06	290.017	2189.68	669.314	3311.04	492.29	1605.06	1114.26	1349.22	536.632	1630.27	630.839	1746.63	646.947	1454.73	164.358	2814.01	1309.69	2877.29	1663.8	1350.23	109.946	1986.26	167.049	1654.76	619.282	2260.85	431.293	2199.45	780.229	1964.63	871.473	1786.61	522.928	2663.97	1117.86
0.714286		1335.8	173.746	1933.72	1148.21	925.641	267.424	1827.05	415.005	2434.24	252.863	1232.84	943.111	971.271	430.595	1185.15	400.519	1399.06	458.371	1204.35	115.453	2175.4	1010.3	2148.94	1081.64	1022.32	110.549	1463.54	149.903	1158.76	435.002	1860.49	351.545	1661.44	661.678	1444.23	687.383	1347.33	414.13	1955.54	895.518
0.779221		944.774	159.242	1299.11	808.685	597.339	235.252	1450.82	259.597	1726.74	172.271	744.846	795.852	667.652	364.483	804.319	350.683	1073.47	343.11	902.225	127.409	1767.65	887.377	1523.58	677.477	783.578	62.285	991.653	122.451	662.972	210.461	1321.76	328.855	1073.1	578.38	1109.2	517.596	865.457	232.187	1428.47	820.706
0.844156		631.445	125.787	900.445	597.7	443.293	126.576	983.436	171.958	1142.74	154.465	409.316	731.963	382.602	309.504	453.803	212.504	821.319	299.427	561.657	106.878	1372.97	695.209	894.475	451.861	547.778	18.204	529.914	26.747	425.588	139.045	810.018	323.983	599.189	412.363	716.25	398.75	533.095	46.76	999.941	601.632
0.909091		370.849	106.108	441.979	366.283	248.335	117.686	572.401	0	672.749	91.2	159.696	547.167	196.658	171.679	200.185	165.654	651.964	236.899	264.992	55.358	1061.99	526.718	418.767	180.554	253.398	4.353	264.675	6.077	241.409	140.601	413.03	193.186	288.246	337.471	422.158	298.945	264.04	70.969	692.211	534.358
0.974026		169.166	125.716	242.725	117.16	0	69.863	197.934	41.288	310.327	64.339	0	501	0	156.968	0	110.829	383.998	165.233	0	0	776.117	416.018	0	60.756	0	0	0	0	0	0	138.429	154.099	0	315.371	141.898	230.508	0	2.021	540.117	352.514

## Sheet: cond I holo(D2-dC) 35 nM
Figure 4-figure supplement 3-source data 2
Figure 4-figure supplement 3D
Non-normalized values
	condensin I holo(D2-dC) 35 nM
Chromosome sample		1		2		3		4		5		6		7		8		9		10		11		12		13		14		15		16		17		18		19		20
		DAPI	mSMC4	DAPI	mSMC4	DAPI	mSMC4	DAPI	mSMC4	DAPI	mSMC4	DAPI	mSMC4	DAPI	mSMC4	DAPI	mSMC4	DAPI	mSMC4	DAPI	mSMC4	DAPI	mSMC4	DAPI	mSMC4	DAPI	mSMC4	DAPI	mSMC4	DAPI	mSMC4	DAPI	mSMC4	DAPI	mSMC4	DAPI	mSMC4	DAPI	mSMC4	DAPI	mSMC4
Distance (µm)
-0.974026		0	0	0	0	0	0	134.659	0	0	0	242.747	194.016	0	0	190.182	92.308	0	65.544	0	0	0	0	554.671	260.464	0	3.714	0	122.648	0	0	0	0	0	257.906	437.249	0	698.72	0	231.277	55.431
-0.909091		318.231	48.026	291.035	113.676	249.789	1.056	334.54	47.791	179.178	67.738	360.625	157.773	112.005	7.323	312.513	96.99	493.81	0	305.334	21.963	531.044	17.26	831.097	397.325	307.031	15.204	346.793	1.602	342.93	194.083	637.352	162.463	436.203	356.166	873.005	142.636	1131.08	91.514	439.378	115.536
-0.844156		532.196	99.303	515.855	98.475	419.427	19.116	608.427	144.938	291.375	154.351	583.955	199.148	349.743	36.692	608.063	137.431	925.639	164.621	682.772	64.743	1064.31	68.405	1311.26	478.338	589.176	0	715.295	0	739.826	467.655	1409.82	236.445	817.365	519.877	1421.21	334.14	1524.12	177.971	652.015	215.344
-0.779221		682.447	107.941	863.962	155.658	608.133	81.624	982.749	183.989	564.008	162.894	853.189	275.361	481.302	131.523	974.828	190.733	1502.9	203.419	1037.22	162.019	1696.09	137.919	1717.42	675.407	864.607	69.889	1185.18	133.684	1190.04	755.793	2198.67	281.982	1296.34	604.949	1945.94	500.277	2089.72	227.304	970.779	402.418
-0.714286		932.758	169.368	1347.62	178.122	928.959	123.015	1474.92	380.141	877.707	265.49	1071.7	412.507	719.082	216.764	1168.77	291.174	2253.93	363.687	1642.26	276.967	2602.42	305.861	2296.61	905.977	1313.09	111.826	1684.03	231.45	1641.09	1018.26	2813.56	364.334	1759.39	702.461	2710.62	609.17	2797.36	440.043	1369.84	604.161
-0.649351		1226.06	347.427	1945.08	221.448	1236.2	255.29	1881.39	544.692	1088.39	398.929	1318.34	589.106	920.436	212.805	1584.16	337.237	3078.87	417.213	1808.78	452.252	3458.04	549.521	2982.1	1153.9	1962.68	219.061	2302.07	429.852	2181.89	1489.32	3551.39	443.278	2351.69	1080.45	3622.6	863.659	3450.6	677.17	1663.17	856.838
-0.584416		1659.01	571.669	2659.94	339.464	1731.37	413.777	2328.68	744.14	1339.83	647.955	1573.35	889.496	1164.11	362.159	2046.34	541.925	4116.53	644.146	2420.75	562.866	4771.42	828.246	3697.53	1697.39	2533.69	294.344	2904.72	652.326	2851.67	2152.98	4221.67	551.148	3138.86	1328.65	4461.47	958.985	4191.93	944.491	2009.74	1099.31
-0.519481		2097.06	929.162	3274.7	497.511	2070.64	621.916	2864.96	984.524	1595.29	931.119	2101.28	1050.92	1515.56	441.697	2520.62	770.688	5516.7	981.965	3295	962.2	6362.24	1414.48	4590.85	2791.99	3036.5	423.434	3398.22	993.528	3793.16	2677	4934.28	742.611	4008.98	1522.56	5572.78	1422.7	5135.26	1400.16	2479.78	1579.76
-0.454545		2503.81	1268.27	3684.24	766.27	2406.43	965.003	3253.61	1557.88	1986.4	1286.09	2577.66	1407.73	1949.47	778.651	3125.49	913.977	6908.88	1573.06	4282.78	1622.95	7914.36	2103.41	5574.23	4431.01	3564.53	657.279	3794.55	1507.49	4834.05	3671.77	5560.48	1139.44	4778.81	1984.97	6643.55	1935.68	6006.48	1850.95	3125.79	2083.96
-0.38961		2853.23	1899.54	4126.31	1483.38	2849.6	1488.01	3887.44	2350.83	2443.96	1929.49	3067.21	2298.95	2694	1248.57	3577.33	1101.77	7977.86	2370.64	5365.95	2471.04	8961.81	2730.4	6209.85	6810.33	4331.45	884.042	3992.98	1775.63	5580.75	4576.24	6277.33	1733.67	5391.21	2136.33	7480.38	2594	6969.27	2580.19	3595.37	2889.79
-0.324675		3309.12	3007.03	4570.53	3141.95	3335.85	2308.93	4701.43	3896.56	2856.01	3275.65	3539.65	3488.93	3082.46	1938.94	4023.63	1582.56	9291.69	3488.32	6615.16	3497.41	10331.3	4272.59	7173.49	10388.9	5403.1	1794.82	4629.81	2144.37	6201.19	5762.31	6803.11	2598	6259.49	2289.89	8431.06	3357.84	7629.38	3565.67	4517.21	3284.01
-0.25974		3946.59	5127.68	4946.56	6313.81	4001.99	3939	5676.21	6621.33	3139.94	5090.98	4103.93	6002.49	3754.28	3446.39	4555.3	2379.68	10470.3	4815.3	7753.63	4755.47	11333.7	6027.95	8428.44	14275	6328.37	2718.96	5435.06	2732.13	6850.62	7337.53	7526.72	4068.11	7000.69	2837.57	9500.6	4552.6	8475.1	5010.07	5592.9	3834.5
-0.194805		4577.33	7238.86	5221.09	10432.9	4733.46	6044.16	6694.22	10249.8	3665.61	7542.03	4632.93	9506.47	4078.56	5974.85	5042.56	3278.05	11921.2	6243.8	8606.68	6340.71	12403.9	8239.89	9902.81	17374.6	7207.54	3891.55	6309.85	3459.22	7383.22	9198.37	8018.67	6207.07	7737.57	3309.63	9990.21	6387.31	9538.17	6812.03	6329.26	4217.47
-0.12987		5022.61	9828.41	5667.62	14327	5606.2	8162.25	7725.54	13835.4	4036.06	10854.5	5162.88	13371	4609.34	9184.14	5415.19	4626.79	13087.2	8306.38	9054.62	7940.79	13230.8	10095	10858.2	19114.7	7758.47	5554.71	7126.82	4538.48	7804.06	11474	8626.7	8739.37	8342.59	3740.57	10249.5	9044.88	10099.8	8875.71	6666.72	4450.29
-0.0649351		5370.25	11558.5	5803.26	16655.4	6369.84	10019.5	8097.67	15994.7	4083.41	13172.6	5630.07	16434.5	5257.72	12461.3	5638.2	5641.22	13971.5	10336.9	9556.27	9486.49	14074	11585	11407.8	20329.4	7945.88	6281.88	7800.65	5678.99	8089.43	12857.9	8871.85	11211.8	8595.92	3902.11	10736.6	12035.1	10111.1	10452.1	6819.58	4641.41
0		5681.61	12039.4	5908.68	17066.1	6843.15	11017.5	8164.1	16166.4	4135.89	14410.2	5660.55	16840	5369.18	14245.8	5782.09	6209.39	14228.8	11104.5	10048.4	9684.04	14620.7	12450.6	11817.7	20786.4	7946.61	6826.42	8075.47	5880	8344.65	13329.7	9045.17	12181.5	8641.1	3970.14	10781.5	13983.5	10114.7	10587.7	6965.14	4753.36
0.0649351		5668.84	10805.1	5859.22	15650.2	6767.66	10769.8	7908.64	14700.6	4083.07	13881.4	5341.58	14447.2	4992.51	14192.4	5655.21	5894.14	13808.3	10828.6	10028.2	8577.85	14586.8	12066.8	11579.2	18353	7822.12	6810.94	7955.15	5547.33	8262.45	12781.8	8726.74	12089	8592.48	3850.17	10551.1	13695.6	9564.04	9327.63	6648.07	4492.14
0.12987		5405.38	8667.97	5774	14151.5	6489.99	9857.13	7344.26	12300.8	3900.02	11847.9	4981.18	10486.5	4795.59	12438.4	5362.73	4743.04	13475.7	9631.91	9989.54	6885.59	14469.2	10994.2	11072.3	14601.9	7563.16	6248.57	7477.36	4412.46	8172.22	11520.8	8396.28	10525.1	8434.6	3419.39	10082.5	11576.8	8368.96	7483.06	6165.01	3887.98
0.194805		5105.74	6520.55	5561.35	12602.1	6205.78	8336.15	6476.83	9679.88	3689.21	8966.39	4475.59	7040.15	4534.76	9767.5	5079.88	3380.65	13029.4	8332.81	9341.12	5350.66	14147.4	9416.36	10221.2	10550.4	7179.89	5689.21	7031.06	3275.75	8054.96	9926.17	7702.33	8468.89	8148.87	3050.81	9372.57	8444.75	7078.34	5825.71	5441.72	3072.33
0.25974		4755.75	4663.45	5311.55	10307.4	5776.4	6575.69	5688.8	7144.3	3298.32	6108.1	3658.96	4510.13	4177.62	7346.18	4678.31	2124.28	12347.4	7525.52	8968.67	4358.05	13203.8	7528.02	9614.65	7333.01	6785.01	5040.47	6546.85	2508.34	7971.1	8047.14	7058.35	6630.68	7668.06	2668.02	8527.42	5718.32	5980.4	4693.3	4710.88	2386.34
0.324675		4419.89	3011.7	4411.62	7256.66	5363.88	4837.12	4851.95	5195.04	2864.15	3931.37	3135.41	3076.23	3846.03	5627.83	4155.42	1248.75	11664.1	6419.47	8444.74	3601.37	12139	5788.76	8460.89	5729.42	6297	4339.3	5969.14	1949.42	7571.53	6483.87	6462.19	5141.78	6668.01	2189.71	6993.04	3920.52	4986.79	3816.33	4186.68	2022.49
0.38961		4070.29	2157.69	3786.04	5028.55	4758.23	3384.36	3928.03	3804.56	2555.12	2710.48	2627.86	2218.54	3300.38	4413.05	3588.41	918.613	10826.9	5180.68	7941.3	2753.1	11417.5	4503.63	7102.59	4723.52	5776.51	3842.72	5168.01	1615.79	6908.13	5204.61	5725.67	4004.52	5903.3	1660.74	6091.23	3072.62	4108.98	3154.4	3749.18	1655.18
0.454545		3708.69	1330.48	3141.34	3200.06	4076.57	2356.41	3018.45	2914.62	2331.9	1861.78	2268.3	1699.82	2833.29	3220.17	2982.81	653.274	9806.82	3858.18	7204.85	1976.15	10438.2	3686.78	5594.66	3590.25	5283.69	3541.16	4349.64	1283.75	6207.33	3951.28	5149.04	3076.96	4869.75	1433.73	5030.07	2319.92	3315.38	2746.84	3302.01	1266.85
0.519481		3089.94	981.242	2560.02	2264.32	3529.5	1565.67	2488.57	2177.08	2091.39	1347.74	1967.8	1295.34	2410.84	2191.99	2451.57	471.831	8520.65	3025.07	6636.69	1398.02	9526.38	3247.98	4435.81	2449.64	4693.01	3048.84	3743.28	942.848	5340.21	2922.5	4536.69	2384.28	4087.8	1001.8	3880.57	1713.95	2657.05	2283.91	2772.6	1007.65
0.584416		2586.45	871.024	2093.92	1699.45	3000.66	1324.34	1965.58	1650.42	1762.02	971.6	1589.33	884.286	1996.35	1402.63	1872.35	301.018	7223.79	2254.42	5938.59	1026.35	8545.22	2928.76	3641.99	1801.83	4031.21	2521.6	3211.75	834.501	4557.84	2275.99	3879.67	1871.48	2983.31	773.021	2954.01	1292.34	2225.78	1905.03	2239.87	730.199
0.649351		2312.4	683.322	1547.37	1322.92	2549.33	1031.9	1520.06	1289.12	1354.49	691.626	1247.95	617.511	1664.26	1190.95	1443.61	286.407	6053.86	1765.45	5060.91	812.329	7200.99	2479.23	2942.4	1447.28	3656.28	1877.64	2738.93	661.461	3884.48	1603.2	3278.78	1494.56	1944.16	405.026	2379.09	951.728	1747.86	1560.17	1761.4	558.3
0.714286		1864.19	509.463	1094.49	1099.62	2171.19	742.623	1157.74	906.626	1034.82	482.204	962.041	449.988	1311.03	1019.18	1039.42	153.754	5071.87	1454.97	4231.82	673.53	6151.5	2178.19	2023.66	972.173	3129.21	1379.48	2299.76	612.571	3285.09	1131.99	2788.22	1209.78	1430.39	324.541	2053.21	843.726	1325.72	1085.66	1458.19	428.677
0.779221		1577.48	461.793	914.822	917.574	1869.1	547.52	893.14	529.119	741.361	195.957	625.939	279.236	1121.75	756.8	855.317	156.688	4459.83	1145.58	3575.96	466.305	5243.9	1676.85	1303.75	746.636	2771.38	1141	1852.96	475.141	2381.49	844.681	2155	887.426	1143.82	256.396	1376.65	785.429	995.295	855.927	984.981	225.591
0.844156		1319.36	443.191	686.199	828.221	1559.5	399.797	490.23	429.196	493.532	190.224	386.335	170.263	1040.58	551.139	582.091	40.807	3644.45	982.086	2885.55	395.87	4487.32	1371.73	802.388	525.137	2460.49	907.319	1455.8	316.82	1743.68	694.119	1747.37	672.704	790.43	68.428	1011.14	572.499	614.061	609.446	607.162	227.795
0.909091		1096.08	365.12	227.204	793.63	1211.76	347.597	302.533	268.86	344.172	107.345	170.235	71.719	864.374	430.836	274.402	49.106	2773.05	668.692	2241.36	292.512	4042.59	1153.81	416.629	314.913	1969.43	629.867	1032.82	256.227	1069.76	524.742	1312.8	614.111	355.938	8.781	449.232	542.948	205.54	439.251	172.581	54.91
0.974026		897.092	266.341	141.007	808.523	1045.56	168.525	0	118.319	130.908	15.151	0	0	758.692	296.672	0	0	2119.25	642.412	1456.44	271.299	3100.19	981.072	0	0	1605.2	453.805	762.829	373.86	831.939	328.965	1187.67	443.185	112.725	0	0	374.762	0	308.928	0	0
