# Supplementary material for: Molecular dissection of condensin II-mediated chromosome assembly using in vitro assays
Source: eLife journal article supplement (doi:10.7554/elife.78984), 2022-08-19
Supplement: supp [file Figure 4-source data 1.xlsx]

## Sheet: holo(WT) 200 nM
Figure 4-source data 1
Figure 4C and Figure 4-figure supplement 2
Non-normalized values
	holo(WT) 200 nM
Chromosome sample		1		2		3		4		5		6		7		8		9		10		11		12		13		14		15		16		17		18		19		20
		DAPI	hCAP-H2	DAPI	hCAP-H2	DAPI	hCAP-H2	DAPI	hCAP-H2	DAPI	hCAP-H2	DAPI	hCAP-H2	DAPI	hCAP-H2	DAPI	hCAP-H2	DAPI	hCAP-H2	DAPI	hCAP-H2	DAPI	hCAP-H2	DAPI	hCAP-H2	DAPI	hCAP-H2	DAPI	hCAP-H2	DAPI	hCAP-H2	DAPI	hCAP-H2	DAPI	hCAP-H2	DAPI	hCAP-H2	DAPI	hCAP-H2	DAPI	hCAP-H2
Distance (µm)
-1.2987		0	0	0	0	1080.96	32.386	207.045	21.237	2732.64	19.452	0	13.578	0	14.6	2567.26	19.751	1686.85	17.733	1617.12	22.795	0	5.621	0	15.067	0	15.792	282.461	0	0	1.382	522.509	22.447	20.92	39.331	0	3.351	0	6.931	798.582	43.29
-1.23377		259.473	33.567	356.055	36.975	1281.59	26.735	989.338	19.412	2878.68	0	507.429	28.271	145.344	8.016	2958.35	18.469	1876.28	18.864	1806.01	31.692	14.71	1.384	247.573	14.053	141.176	0	759.248	41.341	487.624	21.017	548.279	40.863	643.667	35.346	660.444	0	433.915	0	1139.29	50.921
-1.16883		732.463	48.312	806.49	34.192	1578.58	32.183	1743.17	2.713	3165.12	34.761	930.303	4.042	477.516	25.721	3271.52	10.658	2071.21	21.285	1902.92	0	163.65	19.366	462.769	39.911	276.044	3.8	1769.42	53.655	967.84	27.612	578.515	15.118	1504.26	47.257	783.052	19.206	927.165	11.479	1526.72	21.444
-1.1039		1208.43	32.831	1128.24	20.525	2049.71	40.254	2464.85	8.456	3489.03	69.873	1329.82	17.154	798.204	30.483	3615.41	13.521	2348.24	39.946	2105.04	17.339	499.581	0	639.558	9.286	811.909	51.706	2556.58	23.025	1581.53	19.247	864.987	52.739	1943.55	75.928	1198.81	45.165	1477.7	17.333	1993.72	35.187
-1.03896		1760.05	33.176	1432.74	23.49	2539.89	43.753	3004.61	0	3782.99	68.006	1719.98	23.58	966.271	35	4220.88	0.612	2650.24	66.519	2347.07	15.949	934.87	14.405	1154.94	28.783	1298.58	41.194	3136.09	7.36	2100.5	0	1077.55	27.975	2445.12	77.78	1491.42	67.547	2067.88	22.095	2376.24	39.432
-0.974026		2257.33	37.993	1742.15	45.819	3223.51	58.321	3890.75	34.671	4162.99	35.351	2512.94	28.451	1255.2	39.324	4747.35	46.772	2985.1	97.16	2606.43	29.721	1242.45	36.248	1594.69	0	1445.11	30.396	3392.93	12.32	2798.03	32.892	1471.17	54.018	2962.07	77.312	1928.43	39.124	2464.35	23.467	2593.77	46.336
-0.909091		2875.99	47.004	2133.64	31.739	3563.04	76.48	4287.52	6.727	4496.64	33.056	3265.21	12.342	1654.11	44.011	5270.82	39.829	3543.32	26.412	3054.9	53.714	1502.57	45.819	1943.37	30.542	1765.97	49.563	3607.85	20.082	3189.48	26.4	2005.86	29.279	3361.5	79.078	2197.54	28.454	2983.88	7.651	3201.4	51.645
-0.844156		3323.11	43.936	2600.58	13.832	3677.73	81.89	4948.46	23.527	4679.77	24.973	3880.09	3.165	2028.76	63.482	5343.29	47.126	4149.63	52.107	3508.53	65.295	1792.88	78.105	2758.72	20.005	2024.38	76.775	4250.41	35.373	3496.24	26.515	2361.35	66.882	3872.32	44.264	2406.52	21.021	3182.99	9.367	3784.2	61.681
-0.779221		3860.85	67.653	2839.06	6.166	3993.99	62.663	5515.59	40.642	4923.34	41.433	4212.28	6.731	2187.75	65.889	5553.38	53.176	4905.26	59.18	4258.45	105.861	2414.98	115.902	3212.55	55.091	2353.68	79.935	4968.48	48.304	4289.49	63.493	2630.28	58.559	4136.68	59.286	2907.43	24.021	3656.49	32.022	4471.13	111.095
-0.714286		4799.76	79.214	3359.22	52.204	4745.01	108.336	5945.96	56.531	5505.85	56.817	4747.38	0	2361.37	93.748	6003.27	52.087	5617.12	99.149	4912.07	96.75	2991.81	140.878	4001.49	63.565	2870.11	78.966	5561.35	47.233	4922.27	75.355	3124.89	113.54	4628.28	65.77	3492.97	49.712	4470.85	8.205	5208.91	130.048
-0.649351		5765.83	84.338	4332.16	27.527	5493.1	120.106	6176.49	84.637	5954.28	97.284	5729	24.906	2910.47	133.691	6536.09	96.53	6189.19	137.684	5605.3	88.523	3500.16	188.041	4317.93	82.074	3533.86	95.16	6136.83	62.511	5408.68	48.553	3654.25	97.733	4751.94	87.84	4234.56	15.103	4948.34	28.008	5570.94	137.502
-0.584416		6831.74	91.236	4978.52	44.429	6519.21	143.556	6539.2	91.424	6318.07	103.398	6898.21	31.801	3652.24	182.371	6863.21	138.489	6752.53	167.571	6020.56	121.839	3987.18	225.614	4658.74	80.624	4206.7	134.844	6590.11	115.148	6021.26	58.054	4091.65	126.261	5232.48	66.79	5001.07	103.217	5687.61	59.942	6324.7	179.886
-0.519481		7983.1	106.694	5715.96	66.47	7621.11	167.334	7135.91	130.006	7054.15	110.06	7999.64	64.584	4483.5	258.603	7218.21	184.754	7393.26	174.696	6782.72	164.118	4425.23	280.893	5098.52	123.081	4800.26	188.188	7456.04	121.071	6889.84	80.805	4951.23	165.776	5915.21	96.335	5770.74	78.093	6314.05	58.489	7143.72	247.974
-0.454545		8781.62	222.831	6475.83	81.799	8848.86	266.646	7932.54	203.043	7766.27	190.371	8881.75	91.754	5388.85	284.772	7803.78	218.358	7858.42	218.921	7204.34	303.809	5404.29	253.47	5461.49	221.99	5441.42	237.758	8572.7	143.731	7865.47	119.593	5965.05	248.609	6275.28	70.861	6060.89	100.124	7258.56	62.494	7787.48	316.658
-0.38961		9157.12	417.826	7208.4	129.204	10145	399.595	8970.44	260.01	8326.42	269.34	9598.37	83.823	6090.77	361.849	8515.64	266.689	8621.66	346.14	7805.47	410.912	6603	360.981	5865.1	333.492	6101.06	338.185	9967.81	183.725	8197.33	117.914	6888.77	367.211	6874	108.135	7147.33	159.856	7920.98	99.313	8405.53	494.679
-0.324675		10207.8	515.973	7551.64	157.996	11481.4	502.042	9570.55	301.579	8687.85	412.061	10697.2	154.13	6625.24	494.669	9166.61	311.644	9839.62	425.06	8305.01	584.912	7621.54	439.804	6469.59	459.941	6808.39	461.126	11278.6	253.291	8734.81	206.305	7706.54	384.428	7808.76	197.205	7783.35	205	8646.87	191.35	8968.96	617.055
-0.25974		11783.7	747.037	8198.6	294.158	12702.5	674.55	10181	429.705	9264.53	553.905	11857.1	293.499	7249.91	554.697	9774.97	399.983	10633.9	609.569	8898.01	817.611	8759.07	614	7089.87	629.691	7638.26	631.012	12589.7	408.251	9456.01	250.789	8460.32	501.559	8694.44	269.352	9164.92	367.691	9621.48	290.41	9467.48	805.262
-0.194805		12841.3	1161.12	9005.11	435.982	13959.9	1031.67	10659.3	838.611	9502.18	717.613	12966.4	448.847	7713.23	739.17	9947.78	582.735	11625.8	916.907	9347.25	1199.46	9689.7	994.185	7795.83	961.085	8086.94	757.978	13939.2	672.324	10416.9	598.349	9318.17	971.615	9648.5	444.588	10075.2	521.237	10481.2	485.961	9770.84	1310.51
-0.12987		13629.1	1976.71	9962.92	881.234	15187.8	1595.54	11151.4	1671.62	10368.9	1161.36	13892.3	760.712	8275.48	1047.75	10096.3	897.561	12453.3	1423.68	10080.9	1762.96	10418.5	1550.5	8062.05	1600.38	8776.4	1259.88	15299.5	1181.09	11426.9	1137.11	9930.2	1434.65	10396.9	812.402	11030	1190.19	11579.8	823.078	10308.9	2109.52
-0.0649351		14032.6	2543.57	10253.8	1420.83	15748	2352.25	11622.2	2507.36	10692.2	1824.6	14407.2	975.314	8625.33	1255.53	10354.4	1173.77	12764.7	1967.86	10950.3	2193.71	11147.3	1986.84	8587.34	2080.03	9349.01	1644.16	16353.8	1720.58	12165.2	1804.67	10589.4	1962.94	11058.9	1375.49	11655.4	2093.88	12766.7	1258.99	10476.7	3084.41
0		14136.7	2707.78	10732.5	1811.55	15025.5	2822.1	11794	2761.33	10637.2	2198.4	14865.6	1134.47	8812.17	1293.62	10411.7	1347.22	12225.3	2122.57	11152.9	2252.59	11651.4	2023.14	8077.08	2106.31	9897.46	1703.12	17036.4	1866.47	13262.5	2267.53	10556.5	2391.87	11570.6	1860.77	11897.6	2607.56	13324.8	1501.38	9880.89	3291.26
0.0649351		14701.3	2284.93	10958.4	1727.39	14260.4	2492.67	11040.7	2342.03	10120.2	1792.51	14694.3	919.213	8354.83	1086.11	10337.5	1241.42	11566.5	1910.74	10924.1	1842.57	11933.4	1675.39	7532.46	1714.15	9788.06	1421.72	17526.4	1639.01	13640.4	2123.59	10870.9	2277.3	11795.9	1771.47	11205.5	2474.45	13556.8	1350.33	9468.04	2597.97
0.12987		14720.9	1613.93	10630.4	1232.74	13576.3	1712.89	9961.55	1399.65	9243.81	1176.99	14410.1	654.997	7716.66	739.25	9840.24	976.422	10921.4	1369.15	10607.8	1173.43	11742.9	1231.21	6910.15	1140.43	9200.87	949.604	17008	1048.72	13163.4	1504.98	10509.6	2172.25	11713.4	1181.16	10501.7	1830.26	12855.2	1001.37	8694.87	1570.1
0.194805		14040.7	1141.53	9893.81	767.831	12511.1	959.44	8965.22	644.824	8027.08	712.211	14339.4	428.967	7151.71	456.655	9166.07	644.633	9839.39	801.58	9710.16	797.074	11002.9	814.19	6203.71	745.8	8944.42	613.872	15614.8	565.412	12919.9	886.198	9845.58	1590.55	10928.6	669.53	9029.04	1038.96	11383.6	645.917	7896.05	778.544
0.25974		13156.6	747.657	9300.47	517.49	10539	482.251	8143.82	362.228	7082.06	453.476	14300.6	341.733	6353.03	317.874	8500.82	381.788	8976.78	425.485	8763.38	486.625	10304.6	445.917	5464.86	565.182	8347.99	418.229	14450.2	358.594	12454.7	486.355	9337.66	1146.25	10624.2	440.084	8356.63	744.774	10372.1	478.496	6881.32	464.987
0.324675		12125.8	571.369	8503.8	384.134	8382.29	286.383	7529.47	264.716	6116.43	324.38	14087.8	288.336	5908.68	263.006	7599.24	246.357	7833.55	268.607	8536.25	331.28	10164.8	243.421	4994.07	404.828	7994.69	271.906	13241.2	284.931	11988.3	375.276	8505.83	647.025	9978.29	319.187	7808.5	660.402	9646	401.011	6333.53	301.664
0.38961		11025.6	418.368	7680.39	323.52	6276.25	217.193	7016.55	235.013	5457.75	246.042	13282.8	188.371	5260.16	199.085	6546.61	194.055	6675.26	176.843	7569.2	236.265	9722.88	166.642	4733.84	278.446	7272.87	174.677	11919.9	243.748	11517.3	295.872	7614.45	364.664	9010.59	202.326	7367.42	572.382	9159.33	243.714	5265.65	229.976
0.454545		10249.6	292.639	6790.63	193.694	5221.68	147.265	6468.26	205.617	4681.29	165.347	12512.3	108.057	4865.37	151.52	5585.13	131.136	5641.44	127.452	7124.37	222.236	8823.16	99.779	4269.65	190.843	6590.65	128.558	10973.1	206.764	10989.9	221.233	7086.79	295.385	8196.17	136.097	6578.13	369.681	8422.38	185.624	4785.15	179.734
0.519481		9311.02	261.731	6055.38	168.677	4510.63	97.64	6081.59	224.012	4034.14	80.835	11710.4	110.252	4448.33	125.598	4822.58	66.385	4995.32	81.695	5506.41	127.118	8051.56	78.65	3904.62	119.722	5845.25	102.664	9887.64	177.192	10325.9	187.81	6515.74	182.323	7514.5	93.29	6277.09	174.681	7452.17	113.344	4392.68	114.076
0.584416		8372.28	195.354	5613.67	89.315	3819.62	78.147	5305.66	198.411	3678.23	68.817	11094.7	98.256	3825.71	76.796	4378.34	44.414	4191.45	39.777	4733.07	172.545	6962.16	72.735	3573.82	81.628	5251.14	61.981	8611.65	159.314	9498.64	163.471	5979.93	194.994	6874.43	62.986	5439	164.124	6695.09	107.991	3966.25	67.271
0.649351		7699.08	160.856	4750.06	112.158	3198.15	79.023	4713.51	162.261	3578.52	59.001	10400.9	54.046	3189.31	68.549	4031.51	38.612	3595.07	41.909	4041.19	131.111	5414.62	48.861	3124.25	60.25	4666.52	65.201	7628.35	116.419	9006.2	178.231	5198.93	143.199	6349.93	75.474	4949.06	152.65	5668.2	68.562	3496.23	66.113
0.714286		6927.06	138.413	4233.97	84.51	2359.78	19.231	3792.38	114.056	3572.13	63.784	9655.52	60.442	2556.13	88.488	3544.5	59.986	3137.11	34.855	3707.03	67.736	4026.74	49.738	2839.08	58.638	4110.11	34.833	6408.27	98.76	8288.77	176.282	4802.09	129.062	5597.06	59.609	4618.28	154.413	4774.3	39.769	3101.36	90.736
0.779221		6084.07	107.43	3717.31	81.09	1905.5	0	2872.26	93.907	3417	65.366	8656.97	55.57	2047.72	69.619	3241.4	22.436	2911.29	20.292	2786.7	69.287	2802.02	34.499	2630.88	66.849	3683.09	34.098	5142.56	78.726	7691.78	124.477	4210.96	79.323	5123.41	53.071	3936.97	101.773	4081.06	48.66	2631.59	58.268
0.844156		5586.9	135.279	2974.89	69.877	1689.56	31.23	1864.35	48.305	3090.46	37.055	7712.78	85.998	1715.66	44.631	3169.29	40.715	2587.96	43.355	2407.84	75.456	2189.86	21.036	2426.54	36.778	3228.88	60.227	4076.94	80.198	7034.75	93.425	3657.34	122.074	4443.64	44.837	3704.75	90.382	3268.37	75.946	2358.84	46.837
0.909091		5399.78	122.754	2386.1	40.819	1526.09	18.903	1444.77	41.658	2620.26	59.351	7080.18	88.855	1297.45	28.397	2728.83	48.075	1978.11	31.988	1675.71	62.111	1726.18	54.593	2433.8	51.646	2868.02	55.475	3132.14	97.701	6525.32	83.949	2931.4	96.186	3828.49	44.827	3500.68	49.011	2689.53	59.501	2041.09	29.873
0.974026		4851.22	107.743	1695.65	25.018	1433.37	5.897	1169.99	50.468	2523.84	30.258	6332.33	49.861	1081.41	49.494	2173.27	20.783	1577.16	4.712	1225.66	36.074	1146.95	19.556	2136.09	25.023	2455.25	43.136	2183.71	118.46	6281.95	66.201	2438.88	69.267	3369.18	12.887	3293.44	65.114	2462.11	33.377	1521.81	62.577
1.03896		4243.55	105.648	1557.14	11.726	1123.29	22.443	910.861	36.911	2109.55	12.966	5379.71	50.888	973.867	40.151	1709.63	0	1417.24	19.392	961.199	55.574	822.581	1.423	1904.38	41.213	1889.07	19.525	1513.61	94.406	5931.39	59.395	2008.98	61.037	2882.8	9.573	2822.82	53.794	2145.42	27.076	1171.93	17.964
1.1039		4014.75	130.606	1464.63	66.007	923.727	23.293	594.144	60.757	1612.26	12.419	4249.57	37.749	816.989	31.801	1201.56	32.79	990.019	16.371	488.545	40.074	597.475	41.615	1538.11	19.329	1578.29	20.774	1035.12	79.585	5270.43	59.9	1563.91	17.497	2071.79	32.942	2179.89	43.021	1885.24	35.704	782.32	17.706
1.16883		3708.03	98.069	1214.24	35.019	675.993	20.601	374.267	36.707	998.088	2.086	3510.33	32.978	781.174	13.509	642.391	24.386	725.868	34.425	193.574	6.574	405.173	26.854	1252.8	27.301	1299.39	38.488	561.611	63.281	4811	54.1	958.024	0	1288.76	16.882	1572.49	39.371	1644.31	44.56	418.411	1.506
1.23377		3122.92	74.662	957.035	18.103	453.64	37.202	0	39.12	530.139	10.909	2881.07	17.375	669.389	0	236.052	21.716	174.371	0	83.427	36.927	215.88	0.405	1105.5	2.584	973.812	29.485	189.08	76.545	4319.36	30.859	482.987	14.546	809.333	0	1295.8	66.279	1076.4	32.777	208.936	0
1.2987		2581.41	62.028	903.269	6.064	0	25.05	33.687	42.933	0	19.736	1990.04	36.46	757.494	12.725	0	30.592	0	24.666	0	34.5	274.196	16.578	1128.28	9.368	501.298	31.373	0	63.734	3890.56	36.762	0	5.211	0	17.313	949.258	18.578	652.816	354.084	0	5.052

## Sheet: holo(D3-dC) 50 nM
Figure 4-source data 1
Figure 4C and Figure 4-figure supplement 2
Non-normalized values
	holo(D3-dC) 50 nM
Chromosome sample		1		2		3		4		5		6		7		8		9		10		11		12		13		14		15		16		17		18		19		20
		DAPI	hCAP-H2	DAPI	hCAP-H2	DAPI	hCAP-H2	DAPI	hCAP-H2	DAPI	hCAP-H2	DAPI	hCAP-H2	DAPI	hCAP-H2	DAPI	hCAP-H2	DAPI	hCAP-H2	DAPI	hCAP-H2	DAPI	hCAP-H2	DAPI	hCAP-H2	DAPI	hCAP-H2	DAPI	hCAP-H2	DAPI	hCAP-H2	DAPI	hCAP-H2	DAPI	hCAP-H2	DAPI	hCAP-H2	DAPI	hCAP-H2	DAPI	hCAP-H2
Distance (µm)
-1.2987		0	25.947	0	5.781	0	0	1285.31	41.406	0	0	435.791	23.878	324.214	29.494	79.879	30.774	809.244	24.603	0	9.511	0	11.281	969.673	27.068	0	41.378	623.381	9.071	1179.72	0	2349.92	15.882	1341.72	32.777	0	13.316	35.095	0	1067.9	18.028
-1.23377		159.122	26.471	401.5	24.732	176.162	16.319	1581.12	33.143	304.7	30.247	648.732	0	600.817	22.745	23.549	0	1218.13	38.043	164.391	0	498.836	12.944	1127.19	19.07	479.817	33.679	880.88	11.257	1488.11	19.219	2425.7	2.777	1793.34	13.74	178.88	11.171	351.064	13.707	1314.45	13.025
-1.16883		438.806	28.376	807.896	39.094	355.255	20.855	2034.29	18.547	771.624	43.417	956.581	4.181	816.25	0	170.429	7.656	1681.11	7.335	524.713	27.878	828.211	26.899	1290.42	31.348	1059.17	21.444	1259.26	5.189	1684.31	6.89	2694.42	18.052	2307.59	14.269	339.828	25.124	470.85	30.975	1797.7	3.454
-1.1039		621.847	33.761	1172.94	19.748	528.106	30.605	2534.35	15.823	1216.2	51.906	1329.98	26.345	972.063	0.387	537.277	39.816	2199.6	29.317	741.713	30.731	1073.23	8.792	1416.78	53.049	1453.61	27.885	1689.51	0	2277.48	17.841	3127.47	3.399	2620.1	31.275	591.692	5.082	727.092	11.401	1961.27	0
-1.03896		958.944	22.156	1306.01	10.201	691.193	32.577	2792.85	48.741	1643.42	65.276	1619.7	4.151	1271.46	34.198	934.663	18.017	2667.38	30.135	1069.11	28.501	1180.55	14.186	1472.99	57.828	1858.17	29.19	2171.39	12.019	2512.64	9.552	3497.5	0	3054.63	25.59	771.894	0	952.273	28.451	2294.68	9.755
-0.974026		1266.41	63.402	1306.59	18.764	976.28	11.052	3236.53	78.991	2150.09	45.091	2025.57	17.737	1426.28	18.662	1448.99	9.749	3160.64	48.272	1369.85	31.992	1365.43	24.55	1554.22	78.968	2497.74	39.849	2788.59	20.72	3116.68	12.962	4187.32	29.631	3566.88	14.998	913.09	5.175	1120.49	44.944	2787.95	8.158
-0.909091		1636.93	47.652	1235.53	32.07	1407.97	31.35	3774.82	72.37	2742.91	40.888	2650.83	42.467	1537.68	20.417	1926.52	19.748	3779.85	42.355	1751.93	14.63	1465.8	18.034	1829.62	107.999	2819.71	45.104	3095.41	21.287	3491.52	22.917	4409.14	32.114	4273.01	1.826	1039.85	16.478	1343.05	65.082	3284.15	4.756
-0.844156		1882.78	79.733	1151.05	22.102	1799.15	28.868	4639.06	100.043	3422.1	40.303	3205.64	50.202	1728.15	8.642	2531.45	39.539	4509.8	74.289	2088.59	39.58	1878.24	17.311	2206.39	131.383	3268.6	69.205	3182.44	17.084	4041.54	49.905	4656.08	22.944	4560.97	32.154	1313.59	19.079	1717.11	62.727	3750.6	20.135
-0.779221		2426.02	61.526	1561.42	25.964	2452.16	26.654	5348.97	151.319	4277.17	30.259	3650.78	32.896	2082.83	19.702	3129.18	27.932	5168.5	63.283	2493.62	46.24	1832.09	0	2643.11	166.556	3896.95	21.758	3404.34	22.045	4842.84	52.755	5018.6	37.839	5212.89	31.027	1526.68	14.251	2165.3	56.377	4380.33	33.054
-0.714286		3098.79	96.182	2201.87	27.1	3102.49	49.896	5883.64	126.747	5121.31	44.097	3829.4	50.617	2360.58	43.746	3773.71	39.751	5678.2	61.862	2823.18	23.009	2019.48	23.01	3083.33	164.559	4559.44	47.485	3881.47	27.632	5827.21	47.725	5493.04	37.424	5925.61	38.028	1852.19	13.527	2573.1	45.401	5263.26	36.106
-0.649351		3970.23	129.995	2974.59	48.679	3538.13	84.61	6623.25	161.265	6088.94	67.782	4126.24	74.712	2559.62	68.292	4655.21	61.767	6385.02	127.33	3486.51	47.508	2595.69	34.682	3506.41	134.467	5261.17	99.952	4532.98	42.768	7023.19	89.234	5593.53	39.242	6370.53	73.346	2224.5	12.419	2889.82	36.383	6118.2	31.772
-0.584416		4675.77	115.161	3803.84	52.855	4213.67	99.179	6914.81	180.891	6794.53	78.491	4757.31	79.723	3219.51	100.597	5651.04	88.656	7226.23	138.519	4365.47	109.342	3253.51	44.961	3831.18	150.926	6146.98	150.034	5336.93	51.235	8127.77	100.428	5820.06	36.79	6758.41	92.709	2539.64	9.701	3852.59	48.469	6857.22	22.454
-0.519481		5412.23	157.923	4516.62	67.555	5126.45	143.087	7637.15	194.81	6995.81	86.494	5539.2	145.399	3754.71	142.001	6406.27	128.102	8272.88	167.096	5252.01	170.532	4130.4	72.971	4438.8	177.005	7409.41	170.917	6217.35	42.946	8845.58	120.511	6313.54	64.352	7356.86	100.139	2913.3	40.609	4389.05	72.698	7794.84	44.633
-0.454545		6169.56	206.747	4941.15	73.286	5894	165.659	8332.8	201.547	7239.85	110.685	6356.03	203.839	4243.43	215.922	7010.06	155.221	9284.28	188.386	6010.88	235.022	5227.87	112.578	5274.56	189.792	8687.04	280.908	6952.12	55.849	9236.46	240.296	6777.96	92.688	7877.23	129.83	3418.21	72.518	5072.05	110.545	9297.52	63.61
-0.38961		6779.97	215.892	5231.77	95.348	6373.87	181.755	9233.03	252.062	7546.03	136.747	6759.71	305.572	4738.74	327.391	7591.08	210.474	10685.5	295.827	6562.83	316.866	6404.45	106.073	6207.72	250.39	10180.4	317.994	7471.74	93.604	9958.19	259.77	7280.58	145.459	8425	197.609	3995.69	145.367	5755.38	167.423	11137.5	106.492
-0.324675		7487.67	265.716	5878.82	118.406	6878.38	237.206	9988.34	413.385	8131.42	216.256	7065.5	330.048	4864.68	440.305	8085.43	309.214	12317.5	392.698	7360.76	319.242	7597.79	268.943	7502.83	342.837	12070.7	350.307	8640.63	155.535	11137	385.344	7734.86	179.393	9349.88	241.136	4851.9	201.722	6257.87	241.028	12635	196.185
-0.25974		7962.72	376.151	6578.49	191.653	7679.23	385.804	11001	648.821	8818.37	446.529	7457.85	358.903	5034.8	595.505	8800.75	504.661	13828	609.394	8085.55	362.741	8453.03	486.854	8657.53	459.157	13802.3	461.514	9917.94	322.087	12145.2	689.805	8141.96	308.723	10197.6	290.286	5849.97	267.923	7096.53	445.892	13836.1	339.417
-0.194805		8940.32	716.533	7763.71	388.156	8315.09	769.603	11880.1	1103.68	9573.67	925.203	8426.1	530.3	5524.36	847.602	9694.15	736.578	14889	1081.12	8595.67	497.622	9582.7	812.815	9669.54	764.813	15360.5	675.633	10983.3	698.055	13217.4	1153.61	8690.26	518.959	11131	384.862	6605.28	458.91	7811.32	818.247	15242.6	595.833
-0.12987		10324.8	1326.14	8744.66	793.281	9005.76	1397.78	13481.2	1860.76	10682.7	1475.38	9765.42	824.08	6227.88	1303.99	10722.3	1023.23	15276.1	1649.03	10002.9	1056.89	11221.9	1178.43	10561	1478.72	16748.5	1269.73	12066.4	1346.75	14791.8	1716.32	9324.29	772.037	11929.7	665.197	7422.87	947.924	8535.58	1399.16	16459.4	1156.65
-0.0649351		10957.7	1952.06	9606.57	1225.94	9841.62	2057.7	14599.5	2465.86	11590.9	1911.61	10904	1235.97	6826.41	1848.76	11357.4	1238.33	14862.2	2235.2	10909	1606.35	13125.3	1446.83	10953.3	2344.75	18525.7	1963.9	12919.7	2102.79	15981	2089.86	9925.22	1046.87	12203.8	1053.71	8498.94	1621.25	8641.11	1819.44	17512.5	1610.22
0		10952.5	2222.04	10258.3	1479.88	10343.8	2302.54	14875.9	2711.7	11684.6	1922.11	11292	1546.96	7081.11	2144.65	11666.5	1309.3	13894	2527.91	11610.3	1996.72	13759.8	1528.22	10989.9	2906.74	19757.7	2704.68	14072.1	2490.26	16021.3	2257.63	9908.68	1120.01	12182	1436.87	9441.46	2140.34	8353.69	1923.84	17945.6	2029
0.0649351		10566.9	1857.33	10784.2	1331.66	10900.5	2236.99	14130.3	2331.48	11238.5	1483.57	10823	1472.32	7037.83	1957.2	11328	1147.82	12536.9	2254.24	11514.7	1961.59	13105.5	1430.21	10258.7	2643.88	20096.6	2586.27	14107.2	2077.41	15435.7	2024.81	9256.2	929.029	11829.2	1433.13	9774.26	1738.11	7646.96	1602.04	17440.7	1889.21
0.12987		9974.15	1161.12	10594.5	999.436	11268.7	1879.89	12899.5	1767.34	10699.3	970.635	9604.69	1048.52	6445.04	1408.26	10615.3	730.934	11432.8	1506.82	10624.6	1585.34	12119	1237.47	9263.25	1834.69	19192.6	1968.04	12947	1285.73	14246.2	1602.23	8330.13	640.561	11420.6	1078.76	9377.22	1121.21	6901.49	1075.69	15429.8	1473.14
0.194805		9530.71	577.968	10173.8	618.801	11165.5	1456.7	12140	1133.48	9825.91	547.788	8792.18	602.582	6042.36	817.296	9554.28	507.256	10083.5	783.318	9319.48	1155.34	11528	1019.65	8379.04	1003.89	17612.5	1272.79	11859.6	634.379	13226.8	1118.68	7740.97	450.582	10788.1	693.324	8491.02	615.14	6085.05	587.88	13456	928.204
0.25974		9066.08	306.401	9345.34	376.463	10983.2	989.18	10887.3	672.347	9129.56	327.4	7903.04	337.013	5796.51	411.785	8685.03	394.737	9246.69	365.757	7955.02	730.526	10993	873.642	7502.43	594.749	16382.4	698.841	10786.4	394.703	11206.4	730.009	7193.52	314.735	9887.09	361.017	7657	419.093	5211.7	353.534	11886.5	472.274
0.324675		8383.33	215.638	8508.71	217.512	10374.9	577.495	9683.53	432.431	8504.29	237.009	7097.34	234.49	5494.06	243.836	8075.2	309.98	8279.83	194.292	6961.25	484.094	10425.2	693.474	6555.01	477.174	15708.5	366.805	9864.76	315.902	9230.78	459.517	6211.38	233.163	8861.3	163.388	7267.89	301.727	4628.46	245.93	10397.4	301.655
0.38961		7580.01	145.461	7706.35	145.371	9657.07	378.118	8453.41	290.362	7757.35	196.653	6201.81	215.606	5219.66	168.837	7260.92	251.127	7082.78	130.685	6053.56	381.153	9836.35	492.869	5666.06	419.718	14776.7	213.255	8394.37	211.304	7802.65	269.459	5357.74	169.817	7797.52	92.64	6696.05	239.644	3872.19	217.214	9239.64	249.415
0.454545		6675.47	94.745	6571.45	114.394	8933.09	267.824	7762.46	207.18	7123.7	154.397	5133.18	186.905	4774.58	136.639	6463.63	215.889	6145.66	117.359	5253.51	267.051	8916.45	337.364	4884.64	334.659	14175.7	135.568	7156.57	128.805	7021.04	202.966	4551.23	159.683	6735.74	60.679	5739.72	165.465	3379.11	120.061	7910.99	163.621
0.519481		5694.57	76.733	5813.62	89.681	8194.81	195.594	7246.38	143.131	6027.7	109.229	4238.65	152.561	3965.7	122.858	6012.46	200.954	5239.97	111.347	4653.33	196.063	7900.14	234.813	4215.54	228.217	13059.5	135.986	6224.81	119.789	6235.59	153.127	4182.17	107.185	5555.8	53.091	5046.76	121.649	3073.01	92.481	6567.6	110.231
0.584416		4818.51	49.582	5222.05	57.681	7432.15	177.451	6589.71	106.67	4799.72	75.682	3571.47	144.372	3115.31	76.509	5403.46	205.599	4806.47	49.197	4236.49	129.313	7030.65	161.575	3605.62	126.483	12007.6	107.609	5045.99	100.603	5269.06	114.567	3504.25	99.052	4898.79	43.736	4491.3	112.928	2679.12	93.26	5288.06	95.921
0.649351		4151.56	29.523	4123.62	60.069	6631.2	137.582	5923.23	89.69	3880.52	53.27	3046.57	108.529	2594.48	46.659	4650.54	139.9	3788.53	31.08	3543.74	99.376	6355.15	101.372	2950.04	51.132	10974.2	92.159	3863.51	81.749	4674.3	85.599	3178.49	138.699	4448.34	9.302	3986.57	60.565	2415	79.542	4191.92	56.466
0.714286		3630.19	25.863	3452.02	42.269	6111.82	105.513	5140.29	44.094	3171.36	51.917	2758.45	62.923	2351.57	24.18	4005.42	118.659	3130.83	23.828	3057.42	87.122	5647.38	77.549	2516.58	37.573	9390.32	72.803	2665.12	85.569	4503.29	73.984	2985.35	56.378	4186.12	22.304	3666.3	73.519	2203.62	75.84	3292.78	29.168
0.779221		3226.88	29.069	2988.42	29.491	5694.56	85.413	4431.49	51.108	2562.61	57.064	2432.16	58.186	2104.74	29.226	3690.32	104.685	2585.55	45.041	2508.75	59.783	5050.66	53.933	2130.45	38.158	7994.12	26.064	2157.76	34.183	3984.18	41.46	2532.53	49.535	3430.96	21.455	3176.78	53.686	2057.03	65.201	2751.43	39.736
0.844156		3000.32	5.483	2557.34	19.002	5376.51	95.501	3887.82	38.257	2163.82	55.288	2340.68	44.343	1769.44	25.843	3540.51	95.953	2135.22	44.691	2165.85	58.185	4462.01	34.594	1877.98	51.182	6534.17	29.638	1682.71	68.498	3520.2	43.538	2184.24	49.39	2831.23	30.879	2994.95	36.196	1888.03	83.374	2272.81	77.83
0.909091		2850.88	2.38	2322.85	13.998	4817.96	78.897	3138.08	30.081	1884.01	54.847	2058.56	36.552	1302.94	18.676	3488.95	90.061	1718.55	15.295	1855.99	35.55	3809.7	35.12	1563.95	33.092	5504.86	5.762	1469.72	13.082	2938.95	59.678	1365.19	27.958	2480.01	22.616	2789.2	18.006	1559.29	79.255	1978.26	33.715
0.974026		2693.06	9.103	1947.51	0	4342.39	72.943	2441.67	24.881	1527.9	59.612	1775.32	54.499	916.19	32.321	2842.91	135.071	1295.41	14.757	1635.26	23.193	3251.88	30.901	1143.91	42.668	4864.74	32.84	1142.06	23.689	2352.9	51.444	1099.67	25.89	2042.68	28.396	2485.24	53.69	1406.94	74.41	1677.85	29.085
1.03896		2410.12	16.154	1618.02	7.224	3940.54	53.888	1787.22	28.07	1134	39.064	1299.89	65.68	676.227	54.941	2053.51	98.354	1128.54	24.492	1356.57	21.326	2890.93	4.277	827.074	0	4473.5	6.25	602.049	12.036	1863.34	23.98	1017.57	19.219	1624.08	13.134	2092.88	12.625	1114.74	46.741	1391.44	18.089
1.1039		1971.83	22.353	1345.28	3.744	3314.32	41.679	1300.66	31.323	863.682	23.42	1164.85	32.966	486.869	47.196	1272.4	88.011	837.934	0	1082.1	55.45	2599.06	17.342	625.389	2.571	4009.07	13.176	502.634	17.383	1071.9	27.727	790.712	14.486	1268.51	15.881	1856.14	18.757	940.734	37.666	984.499	6.544
1.16883		1401.44	26.816	1020.37	5.881	3034.08	44.827	865.967	0	763.553	38.023	877.844	23.605	320.172	17.517	724.7	70.058	564.075	6.066	845.517	52.351	2413.64	13.145	314.156	4.415	3675.53	5.784	546.958	31.803	657.87	23.293	344.335	19.202	951.973	3.956	1443.42	26.458	553.62	59.413	506.574	21.675
1.23377		884.347	0	652.085	21.497	2630.29	53.037	308.534	31.111	628.418	34.106	476.309	1.579	137.221	15.045	292.611	33.256	318.614	19.543	551.469	61.744	2108.34	14.575	153.178	25.446	3109.07	0	346.769	25.313	228.312	23.836	169.761	20.228	431.628	0	1206.36	27.628	405.505	31.8	222.983	17.034
1.2987		662.373	14.288	191.08	10.414	2374.22	38.044	0	29.208	290.006	21.988	0	32.41	0	30.113	0	32.589	0	18.284	307.104	38.044	1623.71	39.037	0	23.022	2828.87	8.596	0	8.229	0	28.517	0	32.451	0	10.249	1007.27	4.957	0	57.882	0	6.18

## Sheet: holo(D3-dC) 200 nM
Figure 4-source data 1
Figure 4C and Figure 4-figure supplement 2
Non-normalized values
	holo(D3-dC) 200 nM
Chromosome sample		1		2		3		4		5		6		7		8		9		10		11		12		13		14		15		16		17		18		19		20
		DAPI	hCAP-H2	DAPI	hCAP-H2	DAPI	hCAP-H2	DAPI	hCAP-H2	DAPI	hCAP-H2	DAPI	hCAP-H2	DAPI	hCAP-H2	DAPI	hCAP-H2	DAPI	hCAP-H2	DAPI	hCAP-H2	DAPI	hCAP-H2	DAPI	hCAP-H2	DAPI	hCAP-H2	DAPI	hCAP-H2	DAPI	hCAP-H2	DAPI	hCAP-H2	DAPI	hCAP-H2	DAPI	hCAP-H2	DAPI	hCAP-H2	DAPI	hCAP-H2
Distance (µm)
-1.2987		0	0	0	0	0	5.435	67.04	0	0	1.067	0	31.142	337.634	37.144	0	41.524	770.735	135.022	0	0	605.909	88.969	0	11.452	531.813	29.539	0	25.127	0	25.174	0	26.61	247.038	12.86	0	0	0	13.748	710.051	59.443
-1.23377		156.205	4.387	106.921	106.921	163.805	11.088	0	40.264	156.796	6.576	197.872	63.943	477.543	28.757	221.644	11.951	927.772	165.245	228.887	32.085	669.423	41.54	74.518	0	604.027	39.266	118.3	1.185	219.722	0	371.835	0	365.389	77.039	187.134	55.653	209.176	0	952.671	55.1
-1.16883		397.95	7.965	37.568	37.568	476.656	0	240.377	3.686	249.331	15.473	311.144	133.292	658.193	42.038	544.941	0	999.078	119.35	463.281	20.549	886.477	51.862	226.037	23.538	897.248	39.265	244.101	8.648	407.868	29.358	804.126	10.498	523.268	18.84	321.284	21.428	507.846	18.19	1301.03	37.288
-1.1039		744.85	2.665	71.91	71.91	622.518	21.066	242.498	1.177	314.273	0	437.834	113.562	761.726	86.936	698.189	20.696	1354.64	128.58	594.873	7.07	986.697	46.267	385.696	30.125	1144.26	24.377	443.152	9.562	437.713	6.595	1080.98	9.948	790.154	21.922	534.266	41.732	659.109	18.016	1799.29	43.292
-1.03896		1142.74	26.745	135.639	135.639	819.272	27.19	488.534	30.379	606.436	18.963	584.481	153.672	985.86	84.666	863.493	10.617	1339.57	104.001	856.049	29.92	1391.75	62.963	524.117	53.237	1329.52	18.898	555.765	27.862	843.534	3.544	1615.09	5.649	970.771	25.25	848.627	56.448	878.508	17.062	2330.47	124.355
-0.974026		1656.53	33.515	296.186	296.186	1070.02	7.804	806.425	35.915	871.248	40.37	689.13	85.448	1134.54	71.912	1186.13	6.61	1662.89	89.419	910.438	19.793	1621.98	52.468	912.66	9.267	1359.06	30.104	737.388	6.799	1217	29.059	2094.89	12.89	1223.89	4.142	1079.53	61.148	1314.57	14.909	2813.02	137.017
-0.909091		2392	19.915	312.779	312.779	1250.48	12.838	1352.24	40.878	1236.54	6.488	870.634	87.925	1353.78	95.63	1492.85	13.906	1857.09	58.389	1102.05	23.758	2070.74	69.116	1276.49	38.639	1169.33	44.696	956.321	0	1464.74	41.753	2961.09	51.154	1558.18	51.742	1239.88	62.826	1911	24.058	3371.85	130.512
-0.844156		3343.74	61.505	440.244	440.244	1506.14	74.533	2272.03	90.176	1522.67	32.369	1095.32	67.896	1690.08	125.508	1852.57	43.623	2199.96	127.178	1348.47	30.524	2573.97	93.313	1725.55	51.747	1013.07	60.386	1256.29	27.231	1872.41	76.146	3828.08	97.008	1801.17	61.493	1453.38	92.095	2460.74	34.228	4122.07	143.148
-0.779221		4327.16	82.23	690.228	690.228	1690.72	140.217	3314.14	113.209	1865.4	38.924	1334.79	82.34	1970.85	136.676	2280.31	84.374	2459.84	191.821	1582.91	57.042	3199.44	108.792	2202.8	60.096	1089.33	20.59	1568.66	62.124	2343.87	100.883	5193.7	135.538	2185.44	103.367	1804.52	101.21	3094.26	39.493	5142.93	164.952
-0.714286		5593.19	102.245	889.025	889.025	1911.4	157.063	4495.85	129.44	2177.92	27.454	1662.03	105.721	2357.33	125.902	2894.93	130.066	3018.84	189.125	1865.8	98.259	4089.23	158.141	2550.93	85.989	1395.37	68.146	1913.13	59.177	2726.16	132.662	6676.64	170.174	2805	98.825	2226.2	140.37	3821.11	74.305	6327.06	238.835
-0.649351		7545.25	186.545	1411.58	1411.58	2258.61	207.043	5812.32	158.718	2429.81	51.217	1895.17	100.625	2746.86	168.854	3589.95	157.193	3618.94	230.99	2276.1	102.191	4712.71	147.803	3157.72	87.108	1715.7	67.93	2396.69	80.455	3323.78	142.446	8333.14	226.158	3363.85	80.428	2840.59	182.053	4369.37	73.169	7785.56	319.362
-0.584416		9958.18	264.965	2193.73	2193.73	2628.65	212.678	7289.87	181.618	2943.61	66.382	2422.16	68.188	3232.85	261.748	4417.93	149.336	4371.2	291.452	2756.2	110.626	5448.14	161.31	3886	182.016	2209.87	60.237	3025.01	106.079	3991.05	195.395	10530.3	319.624	3931.39	124.054	3800.55	186.466	5334.14	117.244	9281.57	390.246
-0.519481		12704.4	376.45	3118.19	3118.19	2975.65	225.969	8718.86	261.902	3567.77	94.885	3192.05	142.585	3888.23	327.391	5213.38	185.826	5139.8	360.472	3349.35	149.844	6173.59	167.916	4787.01	378.195	2526.35	108.409	3822.88	121.334	4699.03	244.974	13258.7	410.657	4904.31	147.347	5045.85	243.39	6735.37	173.269	10904.3	576.98
-0.454545		15468.7	581.608	3959.26	3959.26	3487.04	258.159	9923.51	428.775	4294.85	160.773	3989.68	164.528	4678.37	444.543	6231.69	277.995	6123.44	510.613	3894.96	188.54	6910.34	251.048	5701.68	435.127	3054.29	116.231	4958.95	172.657	5421.93	443.748	16280.3	597.692	6049.02	229.22	6591.1	394.517	8342.34	315.896	12671.3	901.601
-0.38961		18096.5	807.395	4952.39	4952.39	4223.74	318.785	11387.3	672.608	5435.04	257.078	4886.57	240.318	5773.58	678.393	7476.52	405.202	7102.9	793.58	4605.89	259.126	7655.36	336.265	7124.39	488.156	3715.91	226.808	6376.03	226.112	6287.62	702.385	18824.3	846.056	7057.47	362.544	8262.68	579.028	9965.35	641.998	14652.6	1266.69
-0.324675		20661.7	1065.88	5859.99	5859.99	5070.03	439.255	12865.3	882.741	6488.92	434.608	6206.69	330.386	6999.37	1021.14	9105.6	588.784	8392.43	1245.56	5434.07	324.666	8386.47	609.9	8575.5	547.569	4473.82	314.653	7795.41	333.221	7149.99	1029.02	21029.8	1313.47	8133.76	630.6	10085.9	954.623	11250.5	1201.26	16216.6	1739.95
-0.25974		23129.9	1475.82	6773.18	6773.18	5887.49	713.576	14138.5	1198.11	7556.06	682.439	7617.8	394.796	8378.5	1474.07	10980.6	1044.49	9691.85	1955.58	6396.42	553.486	9326.8	1008.36	9360.01	822.932	5235.39	433.105	9293.9	698.947	8111.21	1586.19	23347.3	1925.35	9155.33	1223.68	12410.1	1566.31	12780.7	1865.85	17585.3	2493.7
-0.194805		25636.5	2036.21	7824.71	7824.71	6924.34	1173.66	15711.9	1573.18	8943.4	1142.62	8854.64	804.315	9602.25	2262.17	13053.4	2009.92	10916.5	3048.28	7670.17	1130.19	10385	1470.72	10601.6	1745.28	5973.84	815.627	10774.5	1484.25	9286.29	2556.52	25398.9	2878.61	10349.4	2542.66	14573.7	2412.68	14537.3	2890.73	19012.8	3793.9
-0.12987		27412.8	2743.51	9531.73	9531.73	7976.45	1780.07	17431.8	2413.44	10192.1	1871.29	10202.3	1487.8	10754.4	3387.13	14920	3403.01	11810.6	4555.04	8885.73	1911.99	11158.9	2367.16	12285.7	3620.18	6946.69	1468.32	12052.7	2905.24	10652.2	3970.51	26354	4438.12	11538.5	4375.96	16484.7	3409.9	16427.3	4143.64	20343	5523.59
-0.0649351		28102	3380.81	10789.5	10789.5	8750.34	2502.66	18031	3382.07	10821.5	2487.47	11484.5	2599.31	11257.3	4360.13	15856.5	4478.47	11934.5	5843	10041	2724.63	11527.5	3351.22	14472.3	5410.64	8060.87	2374.82	13429.2	4038.78	11469.4	5285.6	25953.1	6097.45	12444.2	5763.56	17929.6	4068.77	18165.2	5238.35	21239.1	7120.15
0		28112.5	3703.12	11412.4	11412.4	9091.82	2950	18126.6	4056.4	10668.1	3033.07	11841.5	3494.52	11077.9	4654.66	15760.9	4549.27	10916.9	6158.42	11019.9	3228.5	11645.8	4114.85	16575.6	5931.53	9049.35	3153.37	14434.4	4405.93	11675.3	5606.9	24692.6	6955.69	12959.6	5971.11	18772.2	4207.67	19327.5	5767.18	20706.6	7717.82
0.0649351		26930.7	3462.93	11207.7	11207.7	9423.97	2744.74	17590.9	3824.94	9994.86	2862.47	10954.5	3381.42	10223.7	3781.94	14651.9	3636.75	9995.86	5199.7	11284.5	3186.19	11712.6	3793.54	17619.1	5104.82	8700.5	3121.32	14999.3	3635.06	11325.2	4735.92	22658.2	6435.01	12645.3	4856.37	18587.6	3677.36	19427	5250.26	19155.2	6652.07
0.12987		24872.3	2733.01	10128.8	10128.8	8925.07	2255.17	16588.7	2900.34	8900.12	2161.25	9448.8	2541.29	9320.85	2420.32	13258.7	2458.98	8424.77	3056.17	10897.7	2629.59	11192.3	3214.1	17466.4	3309.69	7772.88	2441.24	14383.4	2497.9	10250.7	3304.89	20107.9	4866.78	11754.9	3291.18	17597.5	2757.08	18541.1	3774.6	17082.1	4741.59
0.194805		23251.4	1965.18	9090.33	9090.33	8347.35	1565.07	14950.7	1816.84	7921.48	1366.3	8204	1459.92	8606.56	1492.15	12061.2	1634.46	7225.39	1523.35	9923.87	1842.96	10158.8	2343.8	16106.3	1716.5	6478.13	1582.79	13383	1568.28	8957.83	1890.12	18157.3	3128.85	10750.2	2100.98	16204.1	2051.4	16639.9	2316.07	15172.4	2923.83
0.25974		21602	1385.6	8063.97	8063.97	7331.91	1061.08	13245.3	1002.72	7121.9	735.652	7246.84	692.699	7932.61	799.999	11077.5	1191.28	5962.3	734.89	8891.76	1241.19	9068.89	1638.36	14488.4	938.257	5402.86	972.889	12151.1	1059.77	7429.7	1064.57	16088.3	1855.17	9693.98	1366.56	14484.5	1539.28	14742.6	1350.22	12998.2	1609.81
0.324675		19352.5	994.628	7008.57	7008.57	6465.77	779.188	11767.3	635.569	6295.09	538.091	6006.72	357.863	6785.6	524.854	9799.44	826.118	4946.67	465.406	7561.29	823.698	8119.88	1105.21	12726.7	653.151	4787.79	572.936	10465.7	868.92	6501.42	714.061	13562.4	1174.11	8580.19	940.123	12749.3	1147.4	12740.7	950.058	10850.1	784.557
0.38961		17134.7	671.925	6528.96	6528.96	5476.32	630.965	10535.3	474.335	5288.26	390.924	5005.59	211.498	5643.44	403.432	8447.85	535.968	3958.55	292.269	6642.64	601.542	6993.18	764.724	11252.2	552.632	4304.97	400.731	8931.11	597.376	5607.1	703.901	11161.9	825.7	7337.7	531.075	11074.8	837.386	10653	677.973	9151.56	462.503
0.454545		15031.4	393.76	6197.04	6197.04	4656.95	531.8	9321.73	331.133	4473.61	308.642	4304.39	138.438	4401.49	299.567	7194.47	375.912	3253.35	167.588	5891.79	460.073	5836.72	502.269	9246.57	344.445	3835.34	300.382	7539.63	333.955	5031.78	618.093	9168.73	650.1	6111.01	313.727	9484.94	627.063	8735.93	490.091	7524.92	343.483
0.519481		12869.8	220.88	5322.35	5322.35	4208.14	436.679	8373.81	213.646	3373.5	259.824	3696.6	146.478	3437.09	199.425	5770.69	263.387	2738.5	133.799	5323.25	348.601	5113.41	369.29	7717.95	221.735	3288.95	198.242	6250.95	246.214	4584.3	497.534	7417.82	476.959	4853.63	211.487	8282.31	488.375	7265.19	328.823	6351.08	248.139
0.584416		10827.3	156.545	4250.1	4250.1	3730.69	365.641	7025.8	160.84	2753.65	201.759	2864.99	100.93	2727.61	143.059	4530.03	173.608	2311.11	70.03	4654.1	280.35	4190.49	258.003	6434.7	259.566	2690.55	136.754	5467.56	157.544	4067.35	332.446	6161.04	324.757	3904.07	129.513	7414.72	358.185	6096.16	198.204	5382.32	136.023
0.649351		9261.55	123.255	3154.65	3154.65	3230.59	269.655	5728.06	124.526	2340.92	136.582	1867.33	71.243	2118.85	131.148	3762.64	150.994	1795.14	64.878	4120.39	261.662	3463.31	246.705	5418.59	182.168	2222.25	75.898	4733.46	128.438	3350.66	213.139	5350.48	239.748	3106.88	135.963	6666.24	312.338	5027.61	149.496	4611.06	114.216
0.714286		7877.68	106.762	2378.65	2378.65	2896.88	205.594	4414.28	113.84	1992.58	90.552	1374.31	122.13	1625.54	82.694	3350.46	146.657	1333.62	61.724	3779.97	176.396	2762.7	179.076	4642.13	128.533	1699.81	51.197	4260.46	142.783	2841.31	148.486	4334.53	182.956	2528.58	123.897	5460.68	255.019	4213.48	123.37	3913.28	49.735
0.779221		6418.76	93.19	1676.66	1676.66	2574.48	243.635	3429.58	98.291	1644.77	124.548	841.339	83.501	1225.48	61.511	2829.11	96.939	981.848	1.12	3343.2	127.204	2322.92	154.242	3745.76	119.01	1500.01	69.506	3716.32	113.402	2473.37	118.997	3733.08	166.428	1978.67	56.882	4330.98	254.02	3415.08	106.148	3362.89	40.016
0.844156		5029.38	61.96	1288.37	1288.37	2217.96	197.101	2730.93	106.027	1132.48	82.733	702.053	112.279	903.367	46.581	2296.78	140.686	801.215	9.702	3045.42	121.694	1789.16	120.097	2929.07	92.464	1245.16	39.598	3167.23	100.279	2098.3	108.587	3076.66	146.056	1541.79	16.087	3241.97	211.301	2958.4	99.455	2624.52	53.234
0.909091		3804.01	43.245	930.219	930.219	1952.82	140.365	2160.89	104.778	861.677	53.806	529.843	75.779	739.654	46.493	1891.95	125.09	593.408	32.122	2657.31	80.569	1317.33	144.749	2332.03	86.014	1028.66	25.557	2636.02	67.467	1742.61	99.066	2436.63	124.921	1183.19	53.296	2434.83	192.588	2472.26	92.522	2237.92	71.065
0.974026		2862.76	34.085	650.256	650.256	1662.02	147.581	1632.06	82.286	816.529	108.524	392.314	76.923	569.302	54.756	1562.91	86.857	333.703	0	2275.94	87.747	989.77	102.94	1647.51	59.562	716.595	38.252	2272.08	56.612	1404.82	105.784	1983.12	97.707	842.902	52.517	1842.93	180.636	1916.87	37.13	1893.79	32.756
1.03896		2172.4	36.85	591.28	591.28	1434.42	109.837	1252.74	50.419	443.079	41.02	398.508	90.141	424.139	5.746	1217.92	112.694	354.19	40.124	2106.09	57.513	877.15	46.329	1267.24	124.199	503.173	40.523	1788.23	40.394	1239.41	132.288	1499.42	65.28	567.275	26.636	1464.41	171.826	1476.97	54.979	1440.51	8.9
1.1039		1639.51	33.645	504.447	504.447	1117.39	136.712	1024.99	64.937	335.563	80.561	296.475	33.993	304.045	5.773	906.203	101.365	183.556	33.839	1806.07	60.082	557.61	58.942	925.553	84.122	445.338	19.574	1403.47	21.177	1207.87	63.814	1038.67	71.361	322.666	30.516	1127.79	163.952	1117.83	17.417	888.421	0
1.16883		1246	9.435	357.001	357.001	995.836	124.336	865.234	62.301	390.084	23.831	246.124	31.379	205.031	13.349	728.126	55.929	116.707	16.178	1471.86	57.2	410.136	48.467	716.928	131.56	243.29	0	1051.92	19.914	974.422	94.175	689.667	80.219	319.362	27.18	850.767	128.837	874.694	11.524	547.584	22.704
1.23377		971.148	17.52	277.134	277.134	934.252	112.784	634.725	61.633	235.833	98.137	253.177	32.11	98.88	14.766	493.541	50.096	38.237	10.366	1261.94	38.667	60.713	45.294	449.748	95.752	79.255	19.144	764.677	14.197	860.515	74.2	353.371	85.407	135.781	0	663.507	169.019	619.107	8.371	226.592	36.867
1.2987		813.41	22.82	154.514	154.514	695.08	113.061	481.223	42.742	191.279	65.014	173.093	0	0	0	354.232	71.369	0	65.441	1152.82	4.19	0	0	369.594	74.27	0	16.347	564.25	1.534	666.65	71.957	68.395	60.637	0	26.124	486.265	157.965	389.742	29.367	0	25.277

## Sheet: ΔG2(WT) 25 nM
Figure 4-source data 1
Figure 4C and Figure 4-figure supplement 2
Non-normalized values
	ΔG2(WT) 25 nM
Chromosome sample		1		2		3		4		5		6		7		8		9		10		11		12		13		14		15		16		17		18		19		20
		DAPI	hCAP-H2	DAPI	hCAP-H2	DAPI	hCAP-H2	DAPI	hCAP-H2	DAPI	hCAP-H2	DAPI	hCAP-H2	DAPI	hCAP-H2	DAPI	hCAP-H2	DAPI	hCAP-H2	DAPI	hCAP-H2	DAPI	hCAP-H2	DAPI	hCAP-H2	DAPI	hCAP-H2	DAPI	hCAP-H2	DAPI	hCAP-H2	DAPI	hCAP-H2	DAPI	hCAP-H2	DAPI	hCAP-H2	DAPI	hCAP-H2	DAPI	hCAP-H2
Distance (µm)
-1.2987		35.508	26.664	0	1.797	1062.4	13.492	0	30.753	0	0	1579.12	22.19	30.964	32.559	0	1.223	0	25.591	0	49.798	145.07	17.528	0	16.39	2437.67	64.756	0	13.713	0	19.462	0	18.416	0	1.301	2137.97	4.573	0	33.062	0	0
-1.23377		645.325	41.536	151.504	13.678	1683.15	12.83	97.414	27.041	662.663	22.21	1886.55	45.179	0	33.798	465.053	0	525.976	25.086	234.037	52.557	308.078	18.047	84.937	0	2564.18	38.277	249.216	7.235	251.046	21.312	402.544	17.08	685.992	0.445	2496.79	8.848	339.627	23.257	393.112	16.96
-1.16883		1103.78	30.216	451.306	21.095	2260.73	0	209.027	29.816	1103.64	34.235	2455.66	79.667	407.458	20.856	806.908	1.489	940.873	57.402	458.415	41.729	585.963	30.169	130.037	2.264	2806.28	0	538.803	13.118	493.099	0	633.673	27.397	1215.77	8.148	2795.17	19.316	760.253	0	908.306	48.405
-1.1039		1861.79	23.405	735.562	3.149	2865.58	46.328	658.287	21.802	1524.45	29.278	2602.62	33.216	742.626	24.487	1070.23	24.5	1167.32	31.987	717.261	39.7	783.001	29.62	428.021	7.09	2977.05	17.761	658.619	32.017	776.922	15.913	1025.92	14.078	1842.92	20.408	3165.33	30.936	1147.68	26.581	1291.65	52.235
-1.03896		2510.02	33.076	1150.13	1.917	3752.84	18.472	874.833	30.15	2081.41	36.541	2824.69	34.036	752.254	33.41	1439.69	-8.645	1923.14	22.975	1002.35	23.318	976.029	32.126	568.774	15.692	3237.59	24.333	841.85	16.628	1264.09	26.976	1825.36	13.532	2580.64	16.316	3628.24	20.508	1211.94	41.624	1504.98	39.523
-0.974026		2949.51	32.997	1511.89	14.942	4507.32	3.504	1144.01	41.636	3156.44	58.607	3149.29	7.774	1189.7	22.84	1779.23	8.51	2547.36	62.843	1207.84	41.202	1139.93	30.824	801.536	16.994	3505.17	38.217	1207.89	10.94	1634.28	33.482	2748.6	16.708	3321.6	25.376	4111.86	16.085	1382.19	46.228	1449.4	19.759
-0.909091		3718.28	44.176	1955.68	0	5179.58	26.408	1745.03	56.049	4087.51	32.522	3273.13	15.908	1581.01	0	2630.49	16.469	3122.46	69.967	1685.27	65.946	1319.64	51.449	966.864	34.087	3602.49	51.953	1609.4	21.485	2051.58	19.943	3183.71	34.072	3925.5	51.963	4620.47	31.799	1770.25	8.962	1791.2	27.611
-0.844156		4652.07	18.515	2290.17	9.727	5911.79	35.396	2214.55	47.894	4935.89	36.609	3548.92	24.723	2109.51	35.896	3492.98	26.513	3458.31	0	2255.32	33.888	1437.96	75.741	1092.14	19.919	3715.55	54.878	2066.13	55.69	2498.04	40.271	3302.83	65.551	4719.24	26.675	4978.25	42.827	2148.65	32.57	1999.1	47.402
-0.779221		5397.47	26.199	2454.29	19.795	6348.25	32.894	2811.21	42.959	6300.89	51.507	3899.22	21.519	2528.75	47.255	4374.35	33.227	4534.69	36.505	2794.08	19.521	1626.21	88.162	1166.49	8.355	4066.45	46.518	2423.24	39.625	3202.28	62.99	3206.49	55.242	5530.64	27.093	5079.43	53.164	2718.31	18.552	2554.24	30.96
-0.714286		6093.05	47.922	2494.19	37.289	6716.03	72.342	3196.8	79.695	8064	47.861	4466.94	29.231	2976.3	31.522	5570.04	53.972	5335.97	45.347	3530.1	38.283	1869.48	67.761	1186.93	62.659	4599.38	47.084	2848.5	9.823	3868.51	52.722	3144.25	47.463	6484.36	0	5127.79	58.76	3043.14	39.725	3266.33	60.483
-0.649351		6856.49	85.549	2952.72	55.161	7225.3	85.287	3468.34	95.223	9777.54	34.374	5314.32	36.68	3392.28	27.845	7002.54	49.242	6368.88	81.072	4241.2	39.615	2130.49	84.651	1468.32	19.188	5172.91	35.193	3389.29	34.636	4449.79	62.92	3481.39	78.245	7913.1	30.908	5173.79	35.717	4060.91	64.321	4072.06	58.792
-0.584416		7683.14	87.808	3806.28	72.847	8052.3	100.4	3605.82	140.124	11313.4	61.871	6006.91	6.351	4053.42	31.373	8823.51	49.682	7292.57	72.974	4932.22	55.157	2506.76	107.37	1767.04	13.112	5842.63	60.214	4081.04	41.253	4940.71	54.188	4051.6	106.49	9391.61	23.969	5296.64	20.721	5266.67	31.732	4703.73	75.41
-0.519481		8515.3	95.597	4783.24	43.543	9003.18	162.981	4088.96	155.218	12573.2	93.865	6602.71	38.506	4701.88	29.663	10696.5	78.783	7585.31	54.145	5777.36	93.345	2885.56	161.586	2316.59	39.454	6443.04	120.53	4859.31	76.38	5722.93	93.755	4546.42	116.938	11453.5	78.399	5665.11	45.651	5985.28	24.925	5295.36	82.554
-0.454545		8900.29	154.531	6049.81	44.095	9897.86	249.95	4243.52	223.361	13319.6	101.379	7083.68	60.664	5064.04	29.831	12261.2	108.711	7992.43	114.77	6147.85	84.075	3606.22	159.402	2822.22	38.667	7063.54	189.654	6001.16	101.072	6535.73	121.198	5610.07	193.242	13166.5	101.947	6155.74	59.725	6588.32	56.659	6109.99	90.702
-0.38961		9076.43	202.98	7283.85	145.302	10707.8	355.954	4802.41	343.316	14630.3	170.605	7613.24	48.747	5760.97	38.221	13560.9	132.372	8545.61	177.606	6880.38	92.746	4163.04	278.955	3422.59	53.45	7448.3	270.359	7197.24	144.884	7603.22	177.669	6505.41	273.45	15331.3	127.212	6708.97	106.901	7195.68	82.7	6541.91	109.244
-0.324675		9671.98	208.641	8386.52	259.864	11677.6	443.661	5415.55	463.425	16167.7	319.595	8466.39	99.233	6731.75	94.979	15029.2	215.824	9159.9	229.262	7561.61	99.91	4933.19	459.385	3844.32	119.304	7975.34	347.359	8203.87	239.191	8166.7	239.562	7330.91	432.544	17500.9	105.182	7153.04	120.123	8391.97	116.606	6905.29	138.45
-0.25974		10225.5	440.74	9612.53	389.57	12926.8	579.595	6206.76	610.032	17423.2	600.071	9615.73	126.354	7771.4	151.128	16359.5	324.069	10643.7	332.6	8179.41	132.841	5490.21	747.802	4095.71	279.998	9134.83	481.427	9174.78	340.33	9046.25	339.566	8257.09	571.734	20107	165.447	8414.57	203.803	9902.39	143.306	7828.06	233.919
-0.194805		11447.3	879.689	10975.1	510.872	14569.4	997.107	7212.26	1130	18676.5	1066.69	10643.5	326.286	9235.52	197.224	17091.8	449.291	11426	622.865	8789.44	170.472	6039.05	1245.89	4745.15	758.514	10757.2	595.778	9583.45	588.341	9883.4	487.596	8876.33	899.662	22157.7	337.359	10324.8	468.542	11128.5	193.147	8654.51	508.098
-0.12987		12353.8	1613.75	13622.8	862.366	15537.7	1791.14	8460.08	2058.96	19750.3	1769.28	11304.5	762.325	10592.1	376.892	17365.2	718.816	12683.1	1124.9	9099.94	389.368	6882.98	2048.77	5270.2	1427.06	12048.1	750.5	10772.9	1036.08	10449.5	723.865	9590.44	1624.89	23941.1	636.793	11889.6	938.191	12577.3	478.581	9066.02	1023.49
-0.0649351		13097.9	2237.47	15144.8	1415.21	15013.9	2475.04	9925.06	2910.77	20733.5	2520	11899.1	1336.72	12050.5	510.189	17779.5	1151.51	13895.5	1807.44	8982.19	610.234	7530.3	2752.11	5931.61	2090	12445.7	857.978	11515.9	1365.81	11406.7	1095.29	10018.2	2532.95	25418.5	966.738	12212.2	1364.04	14476.8	866.909	9533.55	1767.33
0		13255.7	2310.7	16204.3	1811.31	13908.8	2733.52	10812.7	3251.8	20835.5	2741.64	12447.7	1847.38	12578.1	631.471	17785.2	1405.71	14253	2117.48	8493.68	751.67	7643.91	3047.89	6431.26	2295.29	11681.2	865.181	11837.9	1371.34	11335.8	1240.76	10545.4	3096.68	26351.4	1097.89	12284.7	1420.13	15711.5	1204.05	9421.92	2015.96
0.0649351		13008.1	1854.56	16589.1	1597.41	12357	2120.66	10984.9	2754.77	20324.9	2100.53	12623.8	1686.11	12376.6	563.398	17156.6	1346.43	13802.9	1827.99	8217	703.584	7122.59	2502.81	6730.62	1865.59	10687.9	724.316	11793.8	1011.66	10760	1155.55	10669.5	2938.81	26130.6	980.433	12065.7	1037.55	16571.2	1193.16	8853.38	1633.56
0.12987		12476.3	1036.29	16402.2	934.816	10430.3	1401.06	10561.4	1806.08	19029.1	1308.47	11469.3	1224.2	11819.1	471.471	16603.2	998.738	12229.7	1315.06	7497.03	531.363	6645.7	1575.2	6793.6	1256.23	9105.24	551.983	11430.7	675.481	9642.13	863.529	9957.62	2077.05	24360.8	713.453	11474.2	516.026	16502.7	962.278	8237.62	966.332
0.194805		11595.9	520.89	15848.5	423.673	9053.64	735.921	10053.3	1003.32	17879.3	850.999	10086.8	624.454	11109.7	294.074	16056.5	566.01	10416.6	697.951	6610.6	316.243	6337.99	811.655	6442.57	771.768	7957.18	352.872	11042.3	436.551	9036.42	536.681	8944.94	1211.06	21922.7	409.92	11146.7	187.177	15891.5	698.24	7517.34	485.17
0.25974		10541.4	286.894	14755.6	238.095	7565.73	351.904	9469.06	512.796	15686.9	686.759	9018.5	278.759	10060.9	206.243	15319.2	258.752	8694.63	471.99	6306.07	178.792	5869.64	362.967	6247.74	439.649	6770.92	228.956	10536.1	317.842	7957.08	295.85	7977.43	609.584	19901.5	207.753	10348.5	119.274	14393	418.585	6999.97	198.97
0.324675		10134.1	194.77	14165.9	183.574	6327.29	211.164	8900.18	278.473	13789.3	569.725	8085.34	178.957	9199.39	146.565	14353.5	139.306	7347.34	360.434	6079.24	120.989	5132.19	167.417	5746.83	240.929	5559.15	196.279	9691.02	202.371	6993.17	213.487	7408.57	301.705	18320.7	121.841	9738.76	117.692	12945	242.252	5850.07	124.158
0.38961		9305.28	183.184	13449.1	109.479	5251.89	133.137	8175.26	187.492	11695.9	502.811	7049.28	135.192	8182.56	115.377	13245.2	104.402	6520.85	247.778	6009.11	112.246	4226.6	86.808	5055.68	163.878	4984.13	111.467	9102.71	219.79	6657.76	112.997	6487.08	176.046	16862.4	97.641	8523.51	70.302	11608.8	146.424	5020.29	118.471
0.454545		8429.27	153.565	12598	50.107	4483.77	120.165	7797.26	142.787	10181.6	383.709	5633.85	156.668	7394.66	111.139	12232.6	88.467	5766.68	154.22	5507.5	89.579	3515.88	65.51	4480.37	90.375	4265.03	98.441	8415.29	123.548	6579.07	87.982	5980.03	95.002	14960.2	75.913	7115.91	44.3	10089.7	98.238	4441.03	68.826
0.519481		7789.09	120.021	11863.7	22.105	4019.57	104.502	7262.16	114.8	8884.11	280.733	5144.22	102.92	6341.52	85.766	11417.7	50.711	5595.88	117.903	5211.78	115.812	3012.01	35.056	3880.36	63.339	3694.49	82.234	7935.82	143.287	6675.55	101.746	5033.22	73.479	13315.4	61.065	5747.35	48.321	8242.91	65.928	4155.74	53.868
0.584416		7052.16	96.46	11129.6	22.095	3551.38	97.303	6500.28	74.15	7863.89	225.466	4556.03	61.88	5388.29	66.783	10598.1	38.767	5752.9	100.979	4957.74	153.249	2552.67	18.246	3355.69	49.91	3160.8	71.026	7437.29	88.977	5576.98	76.134	4074.09	55.089	11996.6	73.413	4641.55	50.759	6500.25	56.377	4232.3	56.026
0.649351		6483.07	68.967	10564.7	15.822	3195.49	50.464	6013.44	36.724	6713.49	176.098	4002.64	54.668	4838.11	87.213	9644.49	18.986	5415.87	73.896	4588.08	124.204	2266.56	0	2782.15	73.872	2791	70.992	6790.74	57.704	4891.29	76.851	3221.9	37.994	11259.5	71.684	3723.99	36.434	4964.15	66.082	4250.27	71.175
0.714286		5760.73	64.017	9879.05	20.537	2794.37	26.123	5590.04	37.976	5967.1	138.536	3302.98	14.162	4407.71	70.176	8572.86	27.399	4869.12	47.469	4330.34	136.54	2034.29	11.294	2568.12	86.364	2381.41	48.829	6451.56	87.335	4543.87	56.791	2939.86	27.195	10692.5	60.339	3033.27	26.628	4221.91	36.01	4160.58	58.793
0.779221		4850.51	60.523	9114.01	30.704	2371.48	38.259	5077.67	60.204	5410.51	124.971	2553.07	51.074	3770.9	61.671	7810.48	32.671	3856.09	62.776	4083.88	90.953	1790.7	16.338	2173.71	39.771	1847.35	38.466	6348.33	64.71	4224.92	65.033	2898.13	28.909	10012.5	55.817	2440.24	6.137	3477.81	8.403	3743.39	22.62
0.844156		3824.02	1.445	8416.65	37.074	2079.44	22.958	4329.59	45.328	4561.3	111.908	2150.14	40.002	3251.14	60.488	7350.51	34.088	2962.91	60.181	4091.01	62.2	1600.6	6.885	2094.11	1.794	1291.8	47.009	5928.59	27.301	4015.47	63.442	2906.53	20.53	9657.74	51.206	1881.21	5.763	3055.51	47.275	3493.14	54.049
0.909091		2962.25	4.241	7217.32	20.76	1742.12	19.546	3716.79	13.066	3779.26	77.427	1983.79	28.03	3033.25	89.187	7029.68	20.208	2539.52	79.89	3939.83	50.812	1354.58	9.974	2058.88	15.07	974.901	36.254	5671.89	25.867	3653.85	31.583	2735.87	8.253	9133.32	53.871	1513.39	27.197	2506.57	45.587	3457.27	38.291
0.974026		2189.92	14.636	5963.31	7.595	1379.95	10.18	3295.3	13.894	3211.79	61.502	1547.54	19.971	2476.95	31.926	6099.03	31.268	2323.5	58.319	3524.24	24.853	1176.81	16.087	2189.74	14.749	770.072	35.843	5610.77	77.042	3422.91	5.718	2498.36	10.281	7930.19	25.426	1205.46	34.379	1914.12	41.16	3449.57	44.635
1.03896		1590.55	0	4992.96	18.417	1272.82	8.28	3011.73	17.477	2348.65	73.35	1130.47	29.736	1936.8	10.775	5192.19	20.734	1657.19	92.611	2756.56	9.264	848.75	5.361	2294.75	5.067	523.595	22.77	4933.1	31.678	3038.87	40.978	2062.73	21.302	6618.15	28.511	955.509	27.45	1462.8	59.353	2834.05	43.854
1.1039		1132.03	5.5	4413.17	2.157	956.605	22.19	2538.26	5.954	1631.15	61.534	872.26	14.258	1360.75	34.282	4200.24	22.85	1266	50.011	2078.7	40.11	647.116	6.393	1918.45	23.802	280.598	27.283	4124.54	29.449	2587.35	33.536	1949.13	1.459	5243.13	25.429	723.739	25.464	1102.41	45.392	2463.78	33.587
1.16883		747.066	20.456	3889.58	1.678	571.486	24.829	2286.62	0	1177.31	33.737	761.007	23.528	1098.86	35.352	3274.73	53.215	853.527	85.689	1572.53	24.595	412.225	28.89	1851.43	21.596	153.828	39.646	3601.06	26.218	2291.75	9.51	1681.85	0	3741.67	2.806	438.062	5.152	571.231	8.749	2041.78	44.737
1.23377		385.271	33.678	3657.14	0.686	246.168	15.79	2116.63	15.2	712.976	42.972	615.212	22.369	649.66	35.255	2135.81	21.65	744.023	43.814	996.723	16.594	170.701	18.738	1549.96	19.744	0	46.965	3133.56	18.859	1901.05	23.88	1438.37	5.096	2682.11	19.502	221.728	3.074	172.946	22.439	1526.15	41.659
1.2987		0	25.945	3220.24	38.351	0	28.718	1719.78	10.785	600.172	30.105	0	0	513.145	37.326	1234.43	46.11	575.435	43.853	179.758	0	0	7.043	1139.29	23.118	72.709	39.666	2988.27	0	1609.18	38.678	1283.7	4.019	1884.14	3.417	0	0	42.159	1.506	1251.55	21.318

## Sheet: ΔG2(WT) 50 nM
Figure 4-source data 1
Figure 4C and Figure 4-figure supplement 2
Non-normalized values
	ΔG2(WT) 50 nM
Chromosome sample		1		2		3		4		5		6		7		8		9		10		11		12		13		14		15		16		17		18		19		20
		DAPI	hCAP-H2	DAPI	hCAP-H2	DAPI	hCAP-H2	DAPI	hCAP-H2	DAPI	hCAP-H2	DAPI	hCAP-H2	DAPI	hCAP-H2	DAPI	hCAP-H2	DAPI	hCAP-H2	DAPI	hCAP-H2	DAPI	hCAP-H2	DAPI	hCAP-H2	DAPI	hCAP-H2	DAPI	hCAP-H2	DAPI	hCAP-H2	DAPI	hCAP-H2	DAPI	hCAP-H2	DAPI	hCAP-H2	DAPI	hCAP-H2	DAPI	hCAP-H2
Distance (µm)
-1.2987		16.5	25.7	157.422	49.704	0	0	994.903	8.286	0	17.661	0	29.283	2695.14	39.823	54.325	62.751	1870.95	0	1446.72	39.526	28.11	13.142	611.382	0	0	0	420.129	22.381	1731.15	25.481	2038.26	43.183	61.385	9.008	144.311	18.379	0	0	0	48.316
-1.23377		0	25.15	655.209	61.794	105.858	28.272	1307.27	17.675	436.04	25.416	351.682	0	2856.63	55.882	125.527	55.253	2008.23	29.441	1460.72	56.146	189.854	16.917	776.248	4.911	72.811	20.915	776.466	7.016	1863.47	7.444	2307.25	42.877	234.2	33.8	486.819	3.345	225.734	23.638	233.711	36.304
-1.16883		86.05	34.2	966.252	89.754	307.45	33.06	1639.14	0	870.397	18.214	645.552	4.322	3016.8	63.237	344.895	46.757	2191.12	20.02	1771.99	35.298	189.219	34.907	808.913	2.263	215.994	15.848	1039.87	7.246	2087.96	5.76	2866.67	62.202	408	29.785	691.176	0	505.249	44.91	425.804	38.24
-1.1039		415.375	50.425	1356.67	133.003	616.763	23.987	1920.37	19.561	1260.4	0	1215.2	21.505	3364.47	59.235	583.356	92.68	2157.18	64.449	2092.82	51.737	217.672	44.176	793.91	22.987	293.198	4.95	1385.81	37.636	2409.56	1.628	3134.52	26.871	891.846	75.231	845.685	26.193	688.203	4.853	616.473	36.949
-1.03896		657.25	50.25	1515.32	131.555	933.324	27.411	2207.6	17.044	1855.49	23.883	1721.73	17.876	3453.45	51.605	833.303	110.932	1992.83	53.548	2485.94	56.004	273.352	59.256	685.597	12.091	275.236	12.045	1603.46	59.068	2554.71	7.799	3230.49	0	1144.85	64.477	903.364	9.691	1032.13	22.347	915.031	39.653
-0.974026		971.5	27.325	1910.61	157.837	1173.95	32.912	2599.76	29.845	2625.72	21.098	2037.17	9.634	3816.24	78.462	1036.72	111.002	2142.91	17.542	2602.1	49.795	300.176	62.476	481.623	14.778	265.565	38.111	1478.47	19.759	2849.25	36.397	3015.63	10.019	1418.46	96.047	1168	14.802	1232.75	35.559	1291.92	70.405
-0.909091		1395.35	22.4	2419.71	153.67	1290.74	57.348	3066.9	35.052	3212.17	53.841	2132.55	16.602	4362.79	100.124	1445.36	79.784	2417.21	37.616	2685.04	53.735	380.526	102.261	579.172	6.44	310.685	35.01	1597.82	66.045	3277.99	63.497	3399.28	71.222	1900.94	73.931	1373.25	25.255	1431.33	56.95	1765.68	30.046
-0.844156		1645.9	17.75	2872.61	170.26	1570.18	102.941	3543.82	87.324	3601.02	68.976	2574.18	14.393	4821.85	136.259	1940.97	103.525	2958.1	42.981	2894.61	72.127	412.792	111.917	641.636	17.576	419.855	11.37	1649.3	52.875	3649.37	76.744	3207.14	34.682	2388.8	80.185	1919.6	19.731	1866.21	27.01	2343.79	40.383
-0.779221		1978.2	0	3392.77	230.166	1774.75	119.728	4038	134.201	3803.45	68.108	3053.38	50.712	5265.21	186.051	2511.05	140.161	3205.25	18.478	3249.41	94.488	507.193	99.32	836.955	13.79	615.115	38.465	1924.8	59.532	3981.22	105.315	3806.13	54.081	2663.02	144.27	2391.77	34.028	2085.18	34.658	2819.27	74.183
-0.714286		2342.23	20.9	4381.02	272.332	1880.82	150.393	4870.89	215.354	4426.99	132.65	3625.96	88.624	5591.43	226.452	2897.45	147.91	3180.74	41.01	3470.91	123.165	607.833	157.721	865.401	31.922	807.904	3.688	2588.17	98.616	4264.29	158.979	4568.13	77.386	3083.34	126.047	2659.48	47.737	2378.68	29.605	3218.97	69.738
-0.649351		2584.75	30.2	5222.36	308.298	2069.64	184.377	5860.74	284.772	5089.31	199.528	4026.99	68.312	5985.98	289.504	3510.65	219.044	3210.61	58.528	3829.86	186.949	623.894	178.417	932.862	62.263	1068.1	20.676	3183.28	123.302	4943.89	166.964	4984.8	86.752	3427.65	197.662	3154.51	86.27	2563.47	59.268	3659.07	99.06
-0.584416		3182.7	38.075	6046.32	307.141	2304.85	220.773	6439.26	342.523	5918.59	330.324	4181.31	64.098	6274.78	336.927	4083.81	261.276	3619.86	73.732	4203.66	230.727	754.098	202.241	1252.84	125.697	1429.14	31.006	3717.9	128.452	5301.57	253.074	5434.53	114.956	3694.77	275.047	3625.08	93.619	2855.08	81.595	3707.44	131.34
-0.519481		3944.95	67.85	6889.78	428.87	2664.76	289.878	6738.23	344.704	6718.15	448.762	4131.29	71.906	6217.8	407.716	4481.15	335.477	3845.41	97.19	4642.67	300.451	1007.33	297.633	1788.75	175.726	1738.66	43.726	4331.64	165.602	5551.09	328.826	5707.26	166.303	4097.27	395.07	4252.66	121.251	3176.26	119.892	3951.19	190.337
-0.454545		4554.73	134.95	7467.59	471.44	3075.43	297.685	6826.81	346.193	8213.61	606.163	4553.6	113.426	6497.48	577.658	5090.02	437.727	4022.52	91.142	5188.45	364.242	1237.95	378.105	2434.63	257.067	2193.32	37.321	5102.8	260.223	6191.45	463.495	6107.65	217.442	4795.26	529.093	4682.84	175.621	3656.58	228.943	4355.07	251.252
-0.38961		5445.65	203.2	8069.44	513.808	3851.8	486.097	7014.54	392.549	9203.2	720.707	5186.42	248.097	6637.03	793.57	5634.73	572.661	4371.47	222.944	5845.48	542.119	1527.18	543.629	2942.15	373.999	2552.19	123.687	6051.54	484.09	6761.78	622.712	6316.24	348.063	5327.46	786.07	5381.29	321.55	4304.17	339.526	4653.08	299.689
-0.324675		6200.75	344.7	8864.73	615.637	4544.43	586.856	7274.37	530.965	10015.2	926.201	5686.06	634.176	6976	1106.34	6060.65	742.418	4872.82	442.072	6236.78	707.659	1988.46	767.991	3372.97	550.694	3170.69	270.117	6735.95	764.332	7524.14	760.042	6837.28	557.139	6111.54	1305.59	6530.71	491.033	4944.44	447.53	5478.07	416.058
-0.25974		6916.35	627.4	9614.37	1006.26	5230.79	976.338	7617.96	816.307	11116.9	1259.21	6355.83	1104.23	7125.12	1826.55	6648.57	973.694	5125.81	719.771	6983.94	1128.57	2230.98	1089.36	3388.13	826.7	3974.54	596.474	7743.49	1076.64	8162.7	1100.16	7487.73	934.88	6612.28	1889.5	7590.99	673.733	5769.59	686.819	6152.04	631.458
-0.194805		7979.33	1468.45	10186.2	1974.68	5996.09	2197.45	7940.85	1290	12803.4	2115.81	7089.34	1962.58	7512.24	3250.37	7403.21	1478.36	5641.06	1506.84	7426.97	2119.96	2608.98	1885.12	3681.11	1996.56	5040.57	1313.61	8355.06	1790.9	9252.65	2111.26	8775.5	1835.57	7512.43	3337.99	8543.71	1371.97	6681.07	1359.15	7035.44	1046.48
-0.12987		9342.55	3584.6	10519.5	3275.97	6724.9	4422.61	8391.18	2237.22	14711.7	3955.23	7729.96	3516.39	7851.63	5021.55	7941.58	2512.09	6397.78	3469.57	7708.09	4160.17	3263.52	3774.21	4352.91	4746.07	6403.99	3225.73	9226.99	3681.02	10839.4	4456.35	10115.1	3144.19	8392.23	5650.12	9268.51	2939.76	7797.51	2748.9	8399.97	2200.54
-0.0649351		10922.5	6830.88	10130.8	4084.82	7320.02	7034.96	8548.63	3270.26	15846.8	5850.03	8799.49	6014.36	7800.94	7047.3	8508.56	4254.93	7322.73	6389.4	7943.16	6190.82	3834.54	6505.42	5025.72	7593.97	8260.43	5538.83	9836.16	6153.03	12119.1	7209.28	11118.2	4554.73	8990.65	8058.85	9656.78	5136.29	9139.8	4742.45	9709.07	3864.45
0		12365.2	9161.2	9346.31	4111.44	7058.44	7665.71	8180.07	3776.1	16081.5	6803.13	9646.75	6933.89	7406.43	8454.6	8431.41	5206.39	8060.59	8501.26	7704.82	7312.64	4122.47	8362.53	5740.84	8302.67	9697.08	7272.89	10109.7	8076.12	12126.8	8621.25	11331.3	4946.08	8888.5	8562.58	10378.4	6578.81	9976.74	6193.42	10026.1	4854.13
0.0649351		12862.4	8892.6	8207.18	3105.38	6506.03	5972.77	7416.41	3126.86	15193.8	6031.29	10019.7	6052.49	6808.55	8240	8194.93	4811.23	8001.66	7759.21	7234.07	6290.77	3908.6	7498.13	5556.52	6477.44	9838.67	6684.27	10005	7888.36	11094.4	7379.67	11252.1	4284.24	8516.08	6986.65	10333.2	5733.54	10346.9	5849.72	9393.62	4826.42
0.12987		12185.1	6355.4	7480.22	1801.88	5539.36	3262.59	6944.78	1895.82	14651.6	4065.07	9500.19	4094.42	6137.27	6842.34	7528.18	3348.93	6999.15	5155.08	6538.81	4014.83	3162.09	4677.26	5144.48	3355.83	9497.42	4826.05	9629.67	5846.75	9891.6	4705.08	10102.4	2802.24	7496.92	4366.71	9808.23	3675.96	10445	4153.15	8259.56	3510.81
0.194805		10825.9	3382.5	6549.35	890.555	5029.38	1553.51	6661.02	923.257	13677.8	2419.94	8586.18	2354.69	5500.9	4640.3	7186.68	1851.46	6693.7	2694.24	5967.28	2087.99	2498.17	2237.27	4732.23	1384.07	8655.29	2408.19	8680.51	3268.9	8552.77	2447.04	8749.1	1649.63	6609.2	2405.68	8876.03	1927.16	10251.5	2227.44	7315.49	2012.08
0.25974		9340.25	1599.4	5624.1	440.586	4662.44	779.131	6610.83	427.693	12494.7	1527.53	7814.71	1505.18	4964.9	2518.69	6819	898.96	6270.62	1467.73	5399.24	901.187	2012.58	927.975	3981.51	599.689	7546.48	1354.05	7815.9	1687.56	7537.75	1171.96	7671.02	1077.65	5860.06	1444.49	7797.73	937.669	9605.22	1043.91	6320.48	901.011
0.324675		8025.38	910.325	4955.63	267.669	4336.48	468.847	5968.08	302.359	11395.3	1105.27	7514.2	1059.1	4349.18	1245.03	6443.27	462.328	5508.47	994.493	4944.83	473.503	1725.3	482.729	3237.12	412.416	6691.29	835.837	6693.69	924.212	6470.99	773.675	6801.79	711.76	4960.77	879.431	6736.64	593.753	9225.47	626.299	5424.02	497.798
0.38961		6990.65	598.7	4156.56	215.537	3749.21	355.041	5609.61	233.874	10413.5	859.507	6323.63	675.741	3902.23	586.584	5977.64	298.165	4733.52	640.929	4220.85	308.759	1502.67	337.495	2514.43	290.839	5636.79	548.359	5844.77	486.142	5422.23	584.998	6175.11	473.332	4527.54	531.039	5872.64	392.478	8583.29	492.714	4593.02	306.505
0.454545		6413.42	379.5	3563.08	165.013	3481.74	189.959	5211.74	187.585	9223.67	705.713	5096.76	385.707	3464.89	351.696	5372.8	183.181	4203.62	347.791	3717.35	217.172	1450.84	265.352	2058.23	224.314	4522.87	377.356	5383.13	308.183	4568.19	525.735	5179.53	310.493	3999.2	260.816	5007.51	249.813	8089.62	379.997	4040.38	229.042
0.519481		5828.65	290	2968.78	115.614	3130.64	200.545	4737.96	168.701	8518.45	541.986	4369.17	275.581	3059.79	247.455	4677.41	131.713	3542.67	239.509	3214.47	138.689	1181.87	194.37	1565.54	164.027	3804.77	315.557	4506.94	200.544	4054.47	370.559	4448.56	231.604	3259.81	119.185	4314.32	184.083	7569.88	315.462	3530.58	142.308
0.584416		4965.8	227.925	2585.49	91.669	2808.93	136.276	4611.92	143.775	7977.73	416.123	3634.82	214.061	2868.89	198.792	3760.36	107.674	3284.59	176.234	2630.15	86.611	883.937	160.714	1381.11	115.364	3421.59	222.437	3496.41	163.687	3667.77	237.378	3898.55	159.05	2669.68	128.985	3798.85	162.572	7200.72	259.107	3102.82	101.267
0.649351		4162.75	161.7	2189.23	59.258	2504.88	95.212	4073.54	119.412	7582.81	306.053	3088.66	146.582	2477.93	90.087	3047.46	67.677	3182.62	108.729	2211.71	60.629	505.06	113.147	1235.32	69.512	3162.94	185.862	2622.99	129.483	3111.78	110.043	3687.29	94.966	2345.08	86.431	3415.59	136.342	6868.97	197.57	2742.41	77.208
0.714286		3976.9	140.975	1818.58	72.076	2250.28	75.024	3227.78	106.438	6901.9	261.298	2719.78	120.087	2033.63	96.532	2451.37	96.22	2814.54	115.795	2081.66	50.226	460.042	66.334	898.34	71.051	3083.56	130.065	1939.39	84.355	2677.81	62.453	3691.24	83.05	1758.6	32.185	3109.08	91.128	6183.41	141.481	2249.45	80.765
0.779221		3961.05	144.65	1349.73	61.142	2019.05	44.231	2330.11	113.313	6521.41	203.909	2229.86	95.254	1558.72	64.298	1964.38	51.925	2385.21	85.055	1926.56	52.542	300.095	46.785	652.993	44.345	2667.23	149.33	1450.99	51.028	2349.65	30.668	3307.84	58.504	1389.01	53.685	2632.07	73.347	5263.91	94.011	1695.82	67.19
0.844156		3430.55	143.2	1186.48	75.337	1692.2	47.757	1481.97	90.737	5492.29	160.468	1968.7	77.498	1360.11	67.51	1574.25	28.224	1965.84	65.072	1644.74	41.971	219.765	16.944	651.17	43.6	2174.86	127.401	1367.2	54.885	2047.33	28.824	2637.88	60.731	943.8	43.585	2273.29	71.255	4517.76	145.362	1354.31	61.237
0.909091		2830.55	124.6	756.779	80.625	1529.79	59.881	1256.95	91.316	4827.92	140.489	2089.94	32.718	1115.77	42.527	1216.88	42.545	1734.33	61.009	1646.61	34.874	282.568	36.948	776.485	32.208	1941.3	76.45	1169.08	40.05	1738.61	3.182	1798.62	29.221	665.362	31.854	2027.02	72.276	3148.87	97.2	1143.53	38.018
0.974026		2433.88	95.075	627.49	97.9	1394.23	63.233	1064.37	58.845	4262.12	61.579	1927.49	46.271	997.699	34.471	979.185	15.909	1461.49	47.081	1449.27	13.141	417.199	29.741	679.137	27.286	1624.91	64.723	1003.38	0	1638.1	13.659	1440.99	74.531	478.692	53.585	1588.95	81.328	2327.48	59.905	1016.53	31.471
1.03896		1954.7	103.05	343.537	69.235	1158.62	34.304	848.438	57.07	3913.72	53.634	1699.67	59.449	858.634	0	785.417	34.35	967.728	18.815	1015.88	9.322	360.122	31.942	399.813	26.874	1419.58	101.844	769.997	33.685	1363.95	13.471	945.05	17.603	407.292	35.823	1163.16	24.149	1588.2	62.245	920.466	12.285
1.1039		1628.95	108.55	88.952	23.728	1062.49	30.4	495.763	71.193	3414.66	55.257	1356.75	50.764	685.405	21.637	592.823	43.725	728.123	63.711	634.506	14.827	231.511	34.979	244.055	47.265	1049.52	20.275	399.121	0.578	881.047	4.073	606.784	30.622	375.046	8.447	706.781	4.413	1042.87	35.141	868.572	0
1.16883		1561.25	90.8	0	0	1003.26	36.358	345.146	76.254	2828.93	36.853	1027.56	20.378	461.987	1.36	429.234	48.406	585.014	54.46	392.718	0	105.848	15.957	47.765	5.662	820.522	9.56	239.932	5.175	602.702	21.089	292.693	48.595	344.062	2.023	401.67	13.085	763.504	51.305	940.966	2.262
1.23377		1463.7	70.25	25.374	15.341	846.098	39.683	149.494	34.33	2586.71	46.027	845.389	33	71.384	19.911	213.447	26.283	252.302	50.035	256.223	1.293	82.968	11.01	0	27.774	608.589	12.583	177.011	22.08	284.727	0	174.058	39.205	213.877	0	294.675	0.104	465.058	38.135	825.42	28.161
1.2987		1333.75	49.95	147.054	11.693	761.955	30.01	0	36.605	2622.92	51.823	470.993	9.207	0	15.213	0	0	0	49.305	0	7.633	0	0	45.551	6.996	405	12.523	0	23.957	0	14.183	0	8.432	0	3.623	0	20.09	258.169	7.621	519.641	17.85

## Sheet: ΔG2(WT) 200 nM
Figure 4-source data 1
Figure 4C and Figure 4-figure supplement 2
Non-normalized values
	ΔG2(WT) 200 nM
Chromosome sample		1		2		3		4		5		6		7		8		9		10		11		12		13		14		15		16		17		18		19		20
		DAPI	hCAP-H2	DAPI	hCAP-H2	DAPI	hCAP-H2	DAPI	hCAP-H2	DAPI	hCAP-H2	DAPI	hCAP-H2	DAPI	hCAP-H2	DAPI	hCAP-H2	DAPI	hCAP-H2	DAPI	hCAP-H2	DAPI	hCAP-H2	DAPI	hCAP-H2	DAPI	hCAP-H2	DAPI	hCAP-H2	DAPI	hCAP-H2	DAPI	hCAP-H2	DAPI	hCAP-H2	DAPI	hCAP-H2	DAPI	hCAP-H2	DAPI	hCAP-H2
Distance (µm)
-1.2987		0	40.115	1146.43	82.061	0	0	1677.33	70.861	2844.38	423.02	226.379	44.98	126.298	103.825	0	95.233	0	35.938	0	5.62	0	10.985	0	23.829	68.383	1.426	0	16.07	1231.17	46.232	0	0	105.257	34.888	0	0	0	25.765	0	11.789
-1.23377		306.132	60.809	1256.29	83.238	154.59	6.174	1943.23	89.8	3204.26	479.41	139.555	26.413	339.926	118.016	73.327	114.838	201.813	0	251.985	11.139	135.766	0	219.557	3.207	45.693	0	107.506	11.328	1402.95	75.271	102.425	8.963	261.453	13.088	169.953	2.204	385.401	37.425	321.299	25.034
-1.16883		539.85	72.118	1468.5	68.449	291.666	23.119	2178.5	106.817	3639.62	472.872	85.285	2.015	734.104	151.25	84.052	146.35	267.111	23.115	227.99	0	230.299	5.152	439.434	21.289	113.549	11.999	326.653	16.287	1442.58	66.574	212.013	44.116	543.816	0	294.659	6.73	939.081	18.637	529.956	30.052
-1.1039		649.747	103.839	1784.6	83.728	352.035	45.298	2316.77	88.605	3831.52	516.388	220.349	36.1	1196.54	166.354	132.604	113.688	432.021	5.457	467.711	56.737	386.695	31.525	812.534	0	212.645	20.231	553.44	0	1855.13	74.801	337.969	72.768	817.576	26.617	457.419	21.313	1253.12	0	786.843	21.379
-1.03896		889.31	119.96	1972.42	118.008	478.882	94.238	2446.2	124.613	3810.94	543.201	393.127	30.735	1499.16	228.729	264.479	135.505	541.213	44.145	797.297	40.952	592.501	27.088	1343.39	12.32	298.691	22.724	810.101	7.558	2124.26	82.343	385.839	72.554	971.87	27.497	704.232	32.079	1439.9	60.962	1032.13	10.565
-0.974026		1049.71	123.105	1978.62	107.252	797.159	-6.646	2683.44	137.957	3862.93	590.799	355.034	21.778	1787.85	240.615	268.741	159.031	654.663	33.567	805.297	92.369	666.991	60.744	1842.79	21.521	332.002	12.928	1122.39	46.657	1991.63	86.167	529.727	110.539	1098.5	47.938	1039.8	29.632	1762.45	49.498	1185.21	30.958
-0.909091		1398.65	134.44	2043.08	184.015	815.138	44.404	2764.67	144.627	3970.8	658.97	432.663	14.71	2226.62	260.39	323.714	164.846	887.408	56.064	1103.96	56.581	838.697	46.615	2346.13	65.902	391.153	16.135	1394.62	7.643	2097.22	101.323	818.594	123.906	1248.05	39.877	1413.49	29.996	1959.44	62.145	1356.2	0
-0.844156		1751.27	128.907	2283.43	182.44	798.469	24.274	2951.37	209.417	4097.02	682.057	455.3	75.241	2560.83	281.648	390.433	180.465	1159.54	68.369	1181.12	80.962	1194.11	66.855	2710.42	87.347	506.227	23.174	1544.7	8.535	2261.09	106.569	917.414	135.744	1135.86	33.952	1606.31	52.867	2413.05	60.562	1657.33	48.38
-0.779221		2014.81	196.968	2429.59	200.952	893.429	38.165	3161.49	253.257	4220.92	700.117	605.741	67.097	2847.64	347.266	522.556	200.411	1623.99	110.281	1305.38	91.001	1349.82	85.032	3244.06	51.72	606.712	38.939	1841.32	54.701	2250.22	131.752	1171.52	191.643	1203.76	52.684	1831.07	73.547	2731.9	71.357	1838.9	65.604
-0.714286		2327.72	204.371	2596.31	235.944	962.393	72.978	3413.74	297.477	4120.4	730.82	1034.04	69.682	3604.34	332.37	642.333	291.433	2014.92	99.933	1513.06	104.838	1621.77	95.382	4121.27	117.432	830.5	48.713	2155.42	73.537	2329.2	162.177	1367.49	215.194	1526.47	36.608	2152.41	66.438	2911.88	95.838	2178.01	126.909
-0.649351		2598.95	247.45	3012.39	290.707	1022.76	86.384	3853.89	392.755	4351.06	865.521	1366.59	51.758	4337.39	493.488	827.091	311.608	2374.86	161.487	1769	75.591	1974.26	87.514	4579.57	104.514	1027.86	59.19	2425.91	93.402	2657.71	187.529	1653.68	226.143	1794.03	88.636	2489.9	64.044	3102.16	101.188	2295.57	76.304
-0.584416		2905.11	293.489	3441.43	376.45	1251.11	96.715	4279.66	493.37	4687.12	1002.49	2239.85	98.652	4919.01	630.712	1084.72	367.187	2778.69	237.846	2028.17	176.065	2183.29	63.1	5026.12	118.649	1233.93	68.268	2732.79	114.49	3071.2	225.41	1961.44	287.318	2283.28	103.232	2747.28	113.397	3263.28	156.75	2393.97	107.051
-0.519481		3377.17	446.512	3873.41	446.179	1609.31	153.167	4680.76	570.169	5168.71	1008.34	2430.06	216.103	5407.31	777.305	1241.94	516.961	2961.84	373.929	2427.76	228.545	2495.77	172.089	5787.87	192.063	1679.44	98.752	3253.29	202.728	3405.85	287.156	2547.62	353.196	2715.68	149.543	3002.45	157.245	3693.09	202.719	2626.67	149.328
-0.454545		3830.82	696.633	4333.23	555.01	1981.17	254.224	5041.26	728.151	5659.1	1031.44	3061.19	299.434	5884.4	1003.03	1592.25	656.429	3356.49	468.53	2841.4	354.797	2835.8	226.147	6653.9	291.789	2120.34	187.921	3994.6	279.376	3615.48	419.177	3145.41	433.969	3313.91	227.192	3350.21	227.13	3988.38	375.466	2979.33	278.572
-0.38961		4241.79	1049.83	4942.63	707.004	2428.27	404.087	5445.7	829.221	6154.46	1063.44	3427.81	462.461	6799.69	1172.31	2055.31	842.477	3845.93	628.819	3113.72	536.393	3358.21	336.832	7283.37	449.413	2506.15	336.721	4487.23	390.318	3979.17	540.495	3811.77	608.103	3560.18	372.167	3784.15	363.316	4611.88	596.543	3147.24	558.464
-0.324675		4658.52	1485.22	5697.99	826.972	2805.51	618.221	6082.24	1022.37	6321.65	1175.54	3666.59	615.855	7819.16	1442	2409.35	1127.56	4525.4	859.43	3529.7	627.922	3777.98	637.328	8395.08	585.256	2893.63	554.887	5025.81	616.689	4277.8	775.844	3909.34	874.931	3677.35	524.111	4345.11	572.667	5271.18	844.545	3472.61	867.054
-0.25974		5069.69	1988.65	6591.89	1264.94	3270.55	1292.48	6760.2	1274.56	6613.11	1515.28	4084.65	1104.46	8801.38	1914.43	2567.94	1618.66	5242.17	1442.35	4004.56	763.366	4462.09	1335.7	9708.6	868.666	3513.18	1030.93	5887.71	1063.96	4511.54	1521.71	3933.8	1219.12	3843.45	878.089	4914.61	895.166	5876.01	1318.15	3659.77	1800.23
-0.194805		5825.91	3377.87	7428.85	2602.02	3912.38	3322.53	7871.64	1965.02	7038.67	2313.66	4653.9	2281.09	9766.84	3632.17	2578.03	2891.89	5940.35	2817.46	4677.83	1966.38	5177.76	2961.85	11160.6	1778.85	4172.02	2419.34	7043.02	2365.95	4854.62	3437.15	3815.46	1934.42	4145.82	2089.38	5654.22	1565.74	6580.93	2576.12	4166.46	4372.85
-0.12987		6970.3	6855.89	8234.06	5140.47	4497.77	7267.7	8841.5	3370.68	7780.35	4070.49	5154.98	4413.82	10463.7	6617.49	2756.75	4911.2	6738.4	5641.94	5164.06	4462.47	5558.09	5609.21	12658.7	3735.12	4583.82	5075.69	8468.82	5033.28	5509.47	6905.18	4441.15	4133.76	4342.63	4772.31	6530.94	3065.76	7492.69	5326.9	4832.27	7712.67
-0.0649351		8001.16	10950.7	9052.66	7695.55	4997.16	11680.8	9934.92	5333.2	8461.83	5580.09	5889.27	6762.22	10633.2	9970.89	2826.59	7276.37	7665.69	9532.24	5743.92	8249.65	6255.56	8470.22	13888.5	6515.64	4562.88	8216.63	9878.54	8243.71	6014.14	10652.4	5136.28	7519.71	4682.25	9051.06	7443.26	4996.93	7832.35	9094.4	5268.08	11480.1
0		8521.38	13223.7	9186.25	8645.61	5208.87	14723.5	9729.12	6513.37	8107.05	6196.6	6547.44	7593.94	10279.4	11104.8	2776.96	8076.21	8187.64	12533.2	5648.17	10790.7	6669.05	10274.5	14260.5	8441.87	4448.32	9971.77	11030.6	10258.4	5904.82	11942.5	5649.12	10082.6	5139.21	11652.4	8182.71	5876.24	7434.53	11636.7	5391.65	12403
0.0649351		8571.59	10978.6	8841.87	7260.55	5278.81	13638.3	9012.09	6079.22	7523.82	4986.62	7065.18	6420.23	9588.33	9205.99	2298.41	6273.7	8130.56	12153.5	5567.13	10417.7	6614.95	9498.7	13313.4	8184.29	3975.07	8774.4	11869.8	9823.32	5122.88	9577.26	5737.74	9203.92	5452.57	11132.9	8420.52	4931.16	6640.84	9976.79	5284.57	10435.2
0.12987		8219.08	7097.08	8086.62	4491.03	5042.32	9871.01	7231.81	4364.55	6604.21	3189.77	6900.71	4062.27	8671.21	5934.68	1916.96	3743.62	7918.36	9288.12	5526.97	7412	6280.58	6587.84	12276.7	5862.32	3559.38	5746.33	11950.1	7419.08	4622.98	5765.47	5230.55	5996.14	5475.95	7519.1	7970.35	3040.51	5713.95	6160.43	4760.05	6973.8
0.194805		7714.28	3532.73	7108.61	2225.44	4676.96	5985.7	5721.37	2546.91	5858.98	1545.65	6275.85	2248.37	7789.9	2977.66	1628.2	1656.98	7520.81	5900.97	4976.74	4359.38	5370.83	3885.93	11271.5	3127.11	3288.1	3382.4	11344.7	4434.92	4324.43	3050.54	4910.24	2778.11	5282.46	3963.13	7060.87	1646.46	4753.46	3247.42	4361.05	4175.64
0.25974		7361.1	1722.14	6185.24	1114.04	4240.25	3329.42	4768.85	1555.77	5397.03	586.689	5655.29	1514.65	6827.04	1530.95	1547.72	660.553	6735.04	3569.18	4449.14	2894.7	4568.84	2191.4	10551.8	1781.27	2954.9	2056.58	10439.2	2426.66	3620.41	1761.96	4549.46	1227.68	4815.45	2092.29	6399.4	986.061	4109.7	1742.32	4108.76	2540.23
0.324675		6917.7	1154.1	5356.71	759.568	4120.72	2105.04	3811.77	1085.26	4820.05	324.02	4966.63	1246.97	5915.11	980.087	1595.24	383.604	6038.32	2292.07	3967.18	2222.97	3838.18	1414.59	9994.61	1269.11	2573.1	1393.88	9832.45	1428.9	3115.91	1262.36	4171	689.625	4498.86	1520.84	6141.06	639.73	4048.54	1231.59	3705.31	1670.68
0.38961		6079.68	832.725	4616.01	607.54	4038.03	1411.55	3086.74	837.68	4460.62	266.222	4382.53	969.555	5186.9	690.434	1455.26	311.342	5444.36	1619.99	3398.14	1674.73	3415.81	1093.64	9599.54	1049.35	2338.84	910.381	8947.06	856.472	2542.21	772.92	3368.56	514.888	4142.02	1176.52	5932.18	369.429	4064.8	965.552	3329.21	1144.37
0.454545		5651.8	593.818	3839.34	369.244	3876.04	1040.02	2614.05	684.815	4526.08	248.816	3969.97	662.646	4597.09	491.615	1330.15	227.621	4796.16	1203.24	3133.67	1167.08	2876.46	854.95	9494.73	902.472	2132.61	574.415	7994.77	662.806	2025.24	439.294	2968.47	365.641	3527.26	889.303	5727.91	213.452	4030.93	845.987	2987.38	811.62
0.519481		4875.14	396.47	3302.32	234.659	3561.09	821.142	2129.86	516.26	3896.95	170.789	3391.86	511.844	3821.38	282.997	1131.09	106.016	4263.2	848.404	2812.04	977.296	2704.25	742.234	9419.38	797.659	1783.16	427.007	7102.57	435.718	1583.22	273.176	2345.91	312.339	3049.97	759.628	5527.39	183.504	3481.41	683.125	2758.6	580.402
0.584416		4263.26	245.358	2968.5	164.693	3199.03	678.227	1772.58	375.229	3428.26	190.058	2716.78	397.279	3070.17	182.731	1123.01	61.33	3719.8	609.871	2550.48	700.906	2535.78	618.104	9295.06	576.408	1434.77	341.189	6491.85	458.62	1199.1	192.721	1713.07	240.941	2562.17	581.699	5057.33	179.04	3262.97	580.547	2595.31	487.781
0.649351		3710.36	202.971	2511.31	126.236	2842.9	531.417	1513.54	251.57	2954.13	132.532	2153.87	312.21	2482.95	155.768	1173.06	68.683	3258.55	451.859	2401.63	537.443	2396.33	502.807	8754.97	508.855	1409.05	290.777	6476.47	331.801	990.214	163.26	1473.37	214.187	2331.32	511.409	4343.71	138.688	2820.28	481.818	2575.89	405.789
0.714286		3111.78	157.263	2055.36	93.105	2364.59	451.466	1341.23	194.849	2302.88	54.795	1652.46	283.918	2219.17	105.034	1112.23	47.033	2758.16	377.158	2399.59	476.315	2126.35	365.792	8287.16	474.39	1137.01	239.673	6212.81	251.569	867.02	131.618	1342.47	142.531	2163.66	424.803	3547.3	111.422	2721.26	383.097	2312.25	304.38
0.779221		2586.77	114.369	1555.08	53.755	1840.13	362.333	1227.72	149.238	1809.08	74.293	1214	224.307	2235.57	83.15	1145.73	19.991	2312.84	282.551	2099.79	346.782	1910.92	339.108	7907.62	407.498	885.867	159.644	5640.41	278.036	723.782	78.398	1118.11	100.571	1894.39	320.002	2760.69	83.041	2517.38	340.081	1922.11	227.865
0.844156		2320.41	116.089	1266.87	33.672	1548.1	271.796	938.644	104.792	1590.69	76.426	906.115	186.847	2220.07	48.183	1045.3	60.008	1700.04	228.749	1935.01	279.676	1849	302.982	7013.85	365.951	923.108	135.065	4927.38	196.725	571.93	31.501	975.943	137.003	1622.9	248.617	2258.81	62.955	2152.49	294.141	1688.37	153.701
0.909091		2074.47	69.825	1046.05	22.857	1329.36	224.354	804.461	64.417	1230.96	53.907	623.72	124.87	1938.36	72.079	927.951	11.116	1179.25	200.436	1721.92	269.167	1673.06	265.748	6431.88	321.918	671.263	137.142	4049.2	166.034	481.821	7.52	867.844	57.313	1406.06	187.58	1916.8	68.559	1810	250.573	1404.82	94.629
0.974026		1850.62	54.063	887.05	17.44	1327.82	210.752	701.72	53.8	1020.48	41.749	296.157	40.597	1401.32	56.767	804.094	12.775	842.461	123.636	1757.51	220.36	1612.26	212.468	5965.65	301.537	576.602	106.868	3456.27	123.133	475.068	21.477	763.511	18.421	1325.15	132.383	1659.14	70.367	1770.26	214.97	1095.23	106.662
1.03896		1603.42	49.707	842.614	27.562	1454.4	151.09	525.298	33.148	926.788	16.284	389.929	18.036	1048.19	31.348	625.328	29.39	577.457	169.049	1364.88	159.428	1319.99	179.177	5296.29	312.028	446.802	107.113	3074.55	123.804	522.191	23.059	670.768	56.125	1121.45	126.554	1436.68	67.848	1728.54	193.42	971.418	92.838
1.1039		1463.18	27.118	874.091	47.527	1178.09	144.857	305.597	-0.486	795.714	22.65	242.463	19.511	767.707	21.222	430.101	9.246	339.639	125.88	1340.85	143.424	1312.62	152.145	4777.52	248.379	366.728	80.047	2747.49	143.388	338.279	0	486.963	24.642	976.548	114.012	1202.54	48.742	1642.26	156.841	887.62	74.4
1.16883		1428.8	32.212	742.851	17.773	936.127	151.547	124.745	12.928	388.063	23.228	98.218	44.883	430.241	61.048	191.094	21.765	253.984	77.547	1246.92	118.805	1347.59	186.922	4421.48	191.178	284.893	62.666	2575.18	126.895	280.538	22.815	368.701	30.317	651.223	99.149	1027.73	48.763	1445.36	116.759	720.294	68.744
1.23377		1155.06	9.585	474.78	31.67	891.708	116.693	130.591	27.603	107.603	3.327	37.345	0	254.237	40.861	11.705	8.433	159.528	73.862	1317.17	129.251	1305.02	145.725	3872.08	196.602	134.887	94.203	2464.52	92.84	204.343	21.906	256.35	35.631	319.796	86.135	927.972	53.249	1274.29	111.928	560.858	61.054
1.2987		865.9	0	0	0	695.444	127.71	0	0	0	0	0	76.81	0	0	33.426	0	16.628	35.845	987.622	71.91	1224.7	141.128	3692.43	163.827	0	66.232	2349.53	94.99	0	11.442	139.607	28.071	0	57.392	755.091	60.386	1098.14	77.549	504.246	44.387

## Sheet: ΔG2(D3-dC) 25 nM
Figure 4-source data 1
Figure 4C and Figure 4-figure supplement 2
Non-normalized values
	ΔG2(D3-dC) 25 nM
Chromosome sample		1		2		3		4		5		6		7		8		9		10		11		12		13		14		15		16		17		18		19		20
		DAPI	hCAP-H2	DAPI	hCAP-H2	DAPI	hCAP-H2	DAPI	hCAP-H2	DAPI	hCAP-H2	DAPI	hCAP-H2	DAPI	hCAP-H2	DAPI	hCAP-H2	DAPI	hCAP-H2	DAPI	hCAP-H2	DAPI	hCAP-H2	DAPI	hCAP-H2	DAPI	hCAP-H2	DAPI	hCAP-H2	DAPI	hCAP-H2	DAPI	hCAP-H2	DAPI	hCAP-H2	DAPI	hCAP-H2	DAPI	hCAP-H2	DAPI	hCAP-H2
Distance (µm)
-1.2987		0	15.669	3057.4	42.3	0	0	0	40.482	351.667	17.222	0	0	1304.92	0	0	0	1735.04	29.217	1222.86	40.34	0	0	395.8	0	0	0	1997.79	92.288	0	24.789	1226.76	28.067	3.889	26.48	0	0	0	0	5196.97	87.692
-1.23377		361.219	15.669	3221.83	58.516	208.82	5.933	344.48	54.973	677.222	63.611	298.658	1.211	1729.82	25.825	529.604	9.535	2329.44	19.793	1840.07	21.3	589.611	9.174	786.771	20.317	266.189	22.944	2108.26	131.221	185.684	3.306	1477.91	19.774	599.333	16.368	346.588	22.267	740.242	13.817	5427.39	70.065
-1.16883		881.997	0	3845.2	38.28	380.574	27.858	967.136	16.653	1388.78	75	706.298	9.617	2224.64	32.969	1174.76	13.329	3366.47	24.098	2369.53	56.584	1221.3	11.266	1196.62	25.027	640.092	26.4	2220.59	109.366	634.105	0	1984.71	45.442	1121.06	6.763	866.99	47.644	1536.23	21.443	5915.07	48.571
-1.1039		1168.94	33.038	4337.23	69.704	651.102	22.682	1178.06	36.241	2176.67	59.444	1038.38	28.908	2928.64	48.037	1630.5	14.034	4512.43	19.563	2981.71	49.85	2128.14	24.68	1618	23.517	1017.53	38.287	2748.01	127.536	902.239	10	2570.15	34.727	1851.03	0.379	1421.44	49.602	2731.83	20.442	6612.11	66.921
-1.03896		1593.59	34.964	4487.32	76.627	958.176	16.412	1630.03	55.082	3132.78	60.556	1547.05	22.692	3358.71	22.365	2166.6	13.624	5352.59	43.465	3431.19	59.561	2754.94	63.202	2027.51	32.709	1398.36	39.821	3053.86	159.172	1061.01	25.567	3588.49	42.794	2582.88	9.428	1727.93	55.262	3839.32	41.419	7466.47	75.948
-0.974026		1944.87	34.005	4863.52	78.597	1241.84	23.894	2028.62	65.732	3858.61	84.167	2097.52	24.871	3546.7	30.889	2784.45	16.652	5874.72	31.905	4061.35	77.55	3569.98	40.378	2942.59	43.024	1969	23.354	3683.02	158.532	1245.12	53.076	4334.61	55.67	3351.68	15.329	1988.27	35.928	4563.3	49.496	8228.93	101.098
-0.909091		2431.56	56.68	5167.84	83.889	1501.3	23.916	2293.8	67.044	4125.67	87.556	2634.1	34.866	3447.3	19.57	3546.31	23.357	6355.15	35.376	5228.86	81.372	4270.19	32.936	3227.77	19.22	2537.01	30.226	4365.81	211.342	1504.09	25.319	5055.44	44.145	4016.5	43.464	2469.8	38.097	5241.13	54.5	9014.42	130.674
-0.844156		2915.16	64.977	5415.5	81.251	1701.96	29.06	2840.06	80.707	5096.11	78.333	3423.59	55.005	3720.62	59.36	4181.98	30.308	7247.97	63.338	6694.82	108.698	4983.14	65.784	3830.21	29.767	3132.15	5.328	4736.76	259.065	1860.73	33.842	6179.45	49.292	4552.77	3.218	3018.82	87.08	6125.95	66.45	10155.7	125.965
-0.779221		3495.54	73.225	5765.4	132.952	2056.33	39.372	3646.46	102.498	5906.44	117	4178.57	75.988	4244.97	77.776	4582.03	49.46	8271.02	63.228	7507.73	110.195	6052.19	59.005	4367.15	34.817	3455.58	71.738	5310.48	299.755	2289.61	37.581	7432.95	29.885	5349.64	0	3578.09	99.115	7041.62	76.101	11571.8	124.88
-0.714286		4122.48	95.061	6107.1	176.375	2536.49	40.156	4691.66	140.732	6777.94	122	4998.6	113.223	5281.43	67.909	5342.87	70.785	8922.74	86.049	8478.16	168.884	6744.74	85.028	5192.26	41.253	4404.02	53	6044.28	341.283	2974.6	28.271	8598.79	80.176	6241.95	40.207	4542.18	108.807	8133.17	65.857	13224.9	174.658
-0.649351		4862.41	115.342	6260.92	215.174	2934.57	81.105	5673.48	151.443	7649	122.667	5903.13	166.872	6496.47	99.126	5939.12	69.843	9333.67	63.381	9464.68	185.478	7553.58	110.387	6217.1	46.362	5365.3	45.39	7074.16	397.98	3676.73	41.937	9371.92	126.826	7527.51	93.061	5335.96	140.968	9347.46	116.857	14633.2	214.538
-0.584416		5754.41	182.185	6640.1	295.235	3273.75	101.669	6342.6	147.49	8655.78	190.5	6890.42	216.904	7642.66	120.369	6384.52	109.206	9712.49	97.512	10735.7	229.322	8642.4	150.916	7201.56	62.693	6402.75	82.4	8021.53	548.857	4487.76	72.393	10133.4	174.923	9390.33	87.638	6226.56	206.762	11224.7	97.666	15950	299.681
-0.519481		6643.63	227.545	7081.24	449.973	3717.09	111.182	6825.58	189.598	9710.78	270.111	8247.18	301.575	8938.83	149.086	6858.97	142.453	10450.4	113.958	12423.8	356.557	9848.83	251.755	8264.68	98.941	7347.57	151.385	9432.9	670.483	5539.39	111.159	11312.8	238.289	10956.2	139.438	7067.43	198.356	13074.7	166.635	17108.4	371.018
-0.454545		7573.66	321.697	6983.92	685.787	4286.18	128.788	7253.12	235.724	10763.8	263.278	9533.35	464.822	10538.5	239.582	7586.78	163.211	11079	175.979	13621.4	460.145	11588.7	341.42	9319.66	140.637	7975.51	211.6	11116.8	811.045	6797.07	213.105	12247.4	323.555	12113.1	229.932	7806.1	259.232	14197.1	248.336	18293.3	467.519
-0.38961		8357.58	529.738	7057.52	752.438	5101.46	242.062	7624.53	349.276	11765.4	366.667	10781.8	735.716	11637.9	376.556	8541.12	260.868	11296.9	280.072	14445.2	577.532	12787	433.831	10221.9	229.471	8990.38	382.154	12634.6	951.828	7884.26	353.281	13319.8	421.758	13847.4	417.425	9148.39	377.237	15493.3	402.125	19631.2	757.434
-0.324675		9546.25	821.383	7887.86	826.557	6052.22	382.429	8284.13	571.86	12906.8	440.722	12320.3	1039.48	12705.7	581.866	9405.95	404.923	11255.1	446.646	15867.6	679.083	13977.2	548.881	11302.6	344.728	9341.56	672.933	14472.8	1134.31	9206.25	505.835	14227.7	635.521	15782.1	658.572	10660.4	655.914	16913.1	638.791	21078.1	977.844
-0.25974		10544	1447.4	8497.04	1197.74	6951.07	528.118	9288.42	924.599	13446.9	775.222	13772.1	1624.19	13676.2	887.371	10304.5	678.598	11369	796.533	17323.8	1043.21	14960.8	852.495	12333.5	733.942	9733.37	1115.78	16112.7	1563.88	10507.6	872.322	15072.5	968.484	17548.3	986.769	11576.3	976.507	18310.9	1296.74	22633.1	1361.16
-0.194805		11623	2488.5	9123.82	2581.11	7894.82	935.711	10637.4	1721.63	14562.8	1688.83	15208	2865.83	14712.3	1373.63	10691.6	1356.96	11835.4	1587.37	18368.5	1648.58	15981.3	1637.67	13178	1732.3	10256.4	1803.14	17835.6	2404.91	12197.3	1712.12	16292.4	1648.6	18592.3	1634.87	13119.7	1800.29	20200.6	2768.92	24708	2237.41
-0.12987		12997.4	4294.72	9753.41	4811.33	9002.53	1705.23	11852.3	3087.68	15834.8	3097.78	16961.2	4776.84	15516.1	2222.26	11305	2791.34	12380.8	2988.72	18797.4	2716.97	16550.3	3088.51	13909.4	3725.38	10614.5	2853.93	18782.1	3430.19	13595.7	3375.17	17581.7	2794.5	20346.4	2645.92	14324	3113.73	22011.9	4975.82	26069.4	3695.49
-0.0649351		13869.5	5871.45	10932.5	7219.26	9413.75	2471.7	13281.3	4663.82	16325.2	4525.06	18224.4	6380.2	16077.3	2806.56	11731.6	4699.26	13188.3	4753.83	19917.7	3562.64	17838.7	4419.04	14971.1	5883.69	10986.4	3718.82	19590	4173.35	14793.9	5416.63	18143.3	4049.77	21781.5	3613.46	15123.7	4451.06	23969.9	6836.98	26204.8	5145.68
0		14061.8	6077.85	11750.1	7947.11	9594.61	2811.37	14887.3	5725.61	16282.8	5179	18894.1	6547.75	16191.8	2970.85	11653.2	5896.56	13527.5	6019.74	19782.5	4279.42	18596.5	4919.99	15165.2	6322.67	10768.2	4010.75	19105.4	4407.95	15209.4	6469.56	18379.3	4459.32	21858.5	4015.05	15103.2	5138.14	25611.7	7512.07	24731.2	5559.77
0.0649351		13175.1	4575.31	12063.3	6425.27	9006.77	2178.63	14943.7	4864.08	15811.5	4203.17	19107.4	5425.63	15530.5	2358.44	12006.7	5373.6	13125.3	5622.1	18741.2	3719.48	18260.5	4180.18	14276.2	4861.55	10423.3	3235.92	18003.5	4005.62	14813.7	5454.49	18105.1	3727.29	20563	3266.12	14051.2	4327.13	25425.4	6355.79	22544.2	4376.43
0.12987		11998.2	2580.18	11701.5	3895.28	8253.43	1311.92	13849.1	3149.55	14208.4	2765.44	18388.5	3688.8	14059	1507.24	11916.8	3852.91	11924.4	4021.37	16796.5	2747.81	17154	2736.52	12869.2	2928.3	9429.6	1982.05	16699.3	3144.3	13611.4	3302.51	17380.6	2440.98	18467.9	2130.67	12699.9	2836.49	24476.1	4579.41	20356.3	2641.81
0.194805		10650.9	1131.78	11086.6	1890.6	7870.86	694.752	12309.5	1681.52	12338.8	1774.83	17120.9	2137.88	12674.2	873.836	11450.4	2219.1	10450.3	2389.44	15085.6	1626.37	15271.7	1484.47	11426.4	1575.52	8752.15	1055.65	15008	2364.8	12302.5	1489.04	16538.7	1340.13	16354.7	1207.2	11247.4	1467.48	22765.6	2834.97	18303.3	1309.24
0.25974		9795.14	545.113	10224.8	904.264	7237.45	454.154	11021.3	836.772	11283.6	1091	15858.4	1187.47	11424.2	601.881	10657.9	1209.89	9285.16	1323.92	13114.7	842.149	13607.8	904.921	10368.8	1016.03	7851	630.692	13535.9	1822.75	11122.7	710.432	15239.2	627.905	14941.8	771.334	9873.1	738.685	20451.2	1891.75	16135.7	614.263
0.324675		9444.08	332.443	9215.52	560.471	6481.3	352.875	9647.99	476.096	10341.1	816.722	14213.9	651.377	10530.4	473.582	10020.4	845.95	7794.2	943.822	11493.9	518.264	12555.7	662.866	9156.02	756.94	7060.44	399.144	11655.2	1253.77	10150.3	438.577	13787.2	280.283	13548.1	517.135	8812.27	405.624	18364	1274.95	14068.2	345.518
0.38961		8502.61	268.164	8038.13	375.977	5677.39	263.399	8776.29	309.006	8997.44	631.667	12681.9	375.413	9494.02	367.889	9802.65	553.976	6670.5	639.987	9912.02	388.115	11736.4	594.992	7436.16	519.951	6343.79	255.877	10259.1	784.812	9496.55	344.361	12211	212.277	11981.9	360.048	7800.16	274.972	16681.2	820.567	12492.1	260.832
0.454545		7382.2	194.136	6908.08	329.923	4914.57	177.735	7777.18	154.987	8455.89	451.111	11858.7	234.438	8434.88	276.715	9568.62	327.314	5787.15	417.933	8671.86	338.093	11098.8	531.327	6327.33	343.854	5707.07	165.595	8943.21	405.988	8711.12	288.119	10854.3	103.793	10539.4	222.178	6901.39	170.57	14212.7	525.057	10942.6	185.235
0.519481		6215	111.88	6003.52	259.326	4166.48	141.844	6943.87	109.447	7474.11	415.222	10903.1	154.048	7664.44	227.08	8803.99	219.688	4772.91	216.47	7241.23	264.505	10187	475.998	5336.45	221.125	5099.22	144.4	7374.64	276.213	8471.49	213.77	9648.34	76.162	9151.9	140.457	5983.2	129.727	12424.5	426.787	9873.06	127.162
0.584416		5116.05	80.834	5130.27	183.459	3864.47	115.502	6219.26	75.658	6656.78	231.5	9886.99	113.938	6674.38	159.489	7923.45	163.33	3995.87	115.388	6348.76	180.308	8762.58	364.351	4820.21	185.746	4182	111.692	6120.22	179.206	7968.31	145.617	8466.97	84.172	7643.36	128.185	5598.02	90.83	10973.7	267.193	8483.54	72.968
0.649351		4298.4	48.702	4342.33	128.292	3679.79	58.885	5195.39	68.455	5363.89	170.333	8991.36	94.737	5598.36	124.954	7174.8	104.843	3297.42	92.843	4888.47	125.563	7526.3	287.912	4053.21	192.406	3558.21	94.205	5479.32	152.556	7625.19	105.504	7557.95	67.668	6268.35	86.035	5262.76	69.358	9677.84	201.457	6924.9	97.227
0.714286		3795.66	54.298	3851.67	106.527	3372.89	60.08	4506.86	63.604	4285.78	155.778	8030.49	74.33	4635.07	99.429	6176.52	81.015	2803.45	71.367	3953.13	79.404	6440.9	225.414	3217.19	154.39	3023.66	86.118	4264.57	91.651	7046.99	107.94	6833.6	62.06	5133.99	65.595	4635.41	95.389	8511.28	152.991	5677.42	48.08
0.779221		3240.45	55.182	3768.42	97.043	3037.33	87.048	3952.75	24.329	3500.78	122.667	7100.17	47.995	3651.12	68.455	5428.09	110.091	2233.74	54.139	3286.87	110.041	5589.32	208.318	2753.58	100.911	2555.92	78.385	3381.29	92.185	6087.81	68.065	6023.41	68.018	4232.28	76.191	4129.25	74.634	7387.03	108.373	4639.09	73.553
0.844156		2742.17	28.561	3134.31	48.403	2861.95	64.014	3337.59	15.984	2704.45	121.056	6326.23	36.622	2641.69	45.061	4666.87	59.909	1879.9	43.549	2523.73	60.845	4584.23	153.542	2208.61	94.308	1904.6	43.79	2617.26	57.741	4965.32	78.095	5182.07	40.614	3242.71	78.524	3918.44	39.309	6222.32	66.235	3826.75	36.869
0.909091		2518.63	33.869	2407.34	48.127	2671.31	39.896	2815.65	18.016	2265.45	67.111	5561.98	19.733	1920.61	44.206	4002.07	83.356	1422.51	17.566	1993.04	23.009	4097.26	145.929	1546.22	68.37	1664.77	42.923	1794.61	20.376	3758.82	50.387	4508.48	10.325	2646.35	69.295	3393.49	45.762	5338.12	43.858	3088.41	19.161
0.974026		2175.31	21.706	1691.51	27.632	2564.19	26.42	2503.27	39.179	1764.11	50.333	4761.2	18.063	1608.2	49.909	3397.09	48.527	1156.33	9.231	1745.13	29.776	3691.21	117.833	996.417	67.538	1633.63	28.277	1381.56	50.387	3080.81	44.571	3934.38	43.831	1936.1	41.691	2933.85	47.07	4334.02	38.489	2249.45	0
1.03896		2008.49	22.796	1257.57	20.351	2451.54	67.003	2062.63	11.883	1599.22	43.444	3965.52	21.198	1375.37	29.755	2689.8	25.564	1237.21	2.255	1512.32	33.982	3481.91	81.566	704.815	83.254	1328.87	18.979	983.317	36.927	2434.44	75.986	3375.86	29.633	1239.25	8.698	2618.46	59.005	3328.49	31.525	1500.94	31.744
1.1039		1961.59	22.045	934.582	16.685	2371.31	54.974	1651.3	23.317	1158.89	25.833	3152.75	17.582	1073.38	33.893	2342.46	29.309	883.326	11.41	1041.36	33.117	3212.9	107.235	678.519	71.432	1114.68	50.21	776.767	34.964	2106.55	67.562	2517.45	16.664	886.476	26.396	2418.34	52.017	2633.53	21.402	889.021	24.942
1.16883		1898.9	15.851	705.523	14.381	2240.64	44.482	1566.29	20.114	759.778	0	2350.75	9.34	696.576	38.734	2024.07	23.508	608.032	14.511	640.973	31.215	2559.61	73.808	731.678	49.678	777.046	63.569	422.612	23.409	1792.27	49.197	1618.02	47.915	461.6	28.97	1988.05	22.262	1934.83	17.104	384.934	5.339
1.23377		1776.59	29.56	497.185	1.915	1973.47	26.096	1404.31	0	402	60.833	1789.14	8.64	352.269	13.302	1724.51	20.537	255.377	0	356.486	30.253	1801.52	72.734	405.023	35.183	381.769	31.59	248.051	6.264	1555.79	42.787	753.894	15.751	220.094	19.072	1531.95	0.592	1126.18	10.646	166.318	21.099
1.2987		1416.32	8.629	0	0	1955.83	32.028	1225.5	12.444	0	46.889	1304.21	10.489	0	30.729	948.986	8.489	0	15.7	0	0	1233.9	62.132	0	33.322	178.507	31.149	0	0	1183.87	79.256	0	0	0	39.285	1074.76	47.855	687.484	14.476	0	24.116

## Sheet: ΔG2(D3-dC) 50 nM
Figure 4-source data 1
Figure 4C and Figure 4-figure supplement 2
Non-normalized values
	ΔG2(D3-dC) 50 nM
Chromosome sample		1		2		3		4		5		6		7		8		9		10		11		12		13		14		15		16		17		18		19		20
		DAPI	hCAP-H2	DAPI	hCAP-H2	DAPI	hCAP-H2	DAPI	hCAP-H2	DAPI	hCAP-H2	DAPI	hCAP-H2	DAPI	hCAP-H2	DAPI	hCAP-H2	DAPI	hCAP-H2	DAPI	hCAP-H2	DAPI	hCAP-H2	DAPI	hCAP-H2	DAPI	hCAP-H2	DAPI	hCAP-H2	DAPI	hCAP-H2	DAPI	hCAP-H2	DAPI	hCAP-H2	DAPI	hCAP-H2	DAPI	hCAP-H2	DAPI	hCAP-H2
Distance (µm)
-1.2987		0	19.411	0	27.959	0	54.771	864.441	0	0	66.243	944.187	216.285	0	3.596	0	0.485	91.187	73.157	1078.14	46.618	0	57.681	140.995	60.726	0	64.211	0	25.529	0	0	0	0	0	14.79	203.994	0	114.148	16.303	0	60.119
-1.23377		50.376	0	67.459	18.898	14.444	42.607	980.266	17.35	132.784	64.032	1084.28	219.858	154.485	0	91.451	25.057	245.244	23.089	1169.99	58.152	263.323	47.686	280.933	60.327	157.42	98.124	102.952	16.075	355.528	32.047	258.314	0.476	163.052	13.492	96.538	23.47	90.652	0	184.649	29.546
-1.16883		177.057	1.398	27.048	44.4	192.518	38.925	1106.42	4.183	310.663	91.404	1241.33	234.471	298.771	10.515	200.931	28.88	388.058	56.307	1186.62	67.732	531.613	31.689	468.291	73.296	265.279	54.705	283.347	16.947	608.224	77.392	477.029	24.595	431.351	42.922	55.034	55.846	392.36	3.441	417.293	42.195
-1.1039		236.968	36.972	80.736	27.109	316.146	57.17	1252.36	13.54	482.176	91.554	1463.3	291.127	655.721	10.432	285.286	31.014	457.173	69.86	1289.4	71.429	697.566	49.029	730.316	68.784	433.251	36.982	508.109	13.798	876.064	83.269	776.518	27.486	690.609	0	44.284	53.821	355.876	15.722	681.108	71.632
-1.03896		390.596	42.442	244.765	36.571	502.657	74.223	1293.76	11.606	487.594	71.191	1631.76	307.369	913.095	13.856	387.683	35.704	562.589	69.273	1500.15	59.441	936.497	71.448	876.245	92.703	538.585	40.569	753	29.534	1111.37	74.378	1098.93	8.79	1089.12	25.465	132.21	44.118	420.251	37.004	1064.75	25.251
-0.974026		609.27	29.926	309.235	38.5	723.568	41.525	1333.68	39.586	634.27	67.118	1823.23	353.259	1004.35	38.419	592.163	54.42	833.269	88.53	1754.38	96.086	1379.06	61.634	1006.41	86.962	694.175	58.212	927.31	38.268	1514.94	53.06	1423.67	4.816	1356.26	27.858	192.918	59.792	515.981	55.868	1338.53	53.525
-0.909091		952.994	38.236	455.616	17.82	915.299	57.778	1470.25	45.153	576.573	97.689	2120.2	384.572	1005.04	30.941	674.354	72.111	965.888	87.57	1811.58	127.072	1635.71	80.263	1522.08	85.008	601.385	58.507	1067.67	33.566	1960.49	71.937	1705.98	36.43	1779.59	26.695	309.797	65.218	626.842	43.368	1718.98	59.737
-0.844156		1373.49	51.744	560.745	78.579	1090	54.054	1613.25	62.201	906.977	128.647	2340.74	391.717	1125.75	13.989	846.577	88.3	1069.08	65.837	2154.81	121.155	1732.07	163.68	1560.29	86.835	788.323	85.299	1351.95	25.121	2252	69.966	2064.93	96.201	2279.61	77.982	515.986	74.737	818.189	44.196	2125.68	102.461
-0.779221		1724.52	61.139	577.388	76.665	1317.18	73.758	1884.64	89.525	1296.03	118.727	2505.01	449.287	1561.6	40.821	913.519	144.303	1221.46	96.862	2283.4	119.179	2027.51	153.327	1844.42	143.556	1013.48	93.929	1401.16	47.241	2586.35	113.509	2542.24	112.215	3082.35	47.987	439.288	70.644	889.793	71.937	2606.98	105.539
-0.714286		2187.27	99.355	682.675	86.8	1647.1	113.792	1982.81	124.964	1697.39	133.486	2841.31	490.33	2021.97	51.699	1236.96	185.137	1427.38	152.19	2341.31	145.647	2537.76	175.544	2164.49	189.51	1302.82	95.651	1601.95	58.34	3013.42	110.854	3077.25	121.849	3497.44	68.664	581.393	86.175	1121.09	104.213	3040.43	125.535
-0.649351		2641.03	119.812	884.532	114.164	1956.51	124.522	2270.78	185.179	2110.77	185.689	3325.85	519.079	2408.71	62.043	1503.66	252.871	1480.47	138.087	2509.37	165.544	2989.66	245.894	2353.16	127.436	1779.1	114.118	1967.22	50.26	3462.11	87.726	3444.96	155.363	4624.13	78.337	655.554	131.783	1171.54	157.656	3573.98	112.894
-0.584416		3441.31	122.83	1154.44	135.835	2309.76	144.293	2464.29	251.19	2469.35	195.311	3735.23	539.464	2899.51	98.826	1950.74	339.606	1694.24	167.277	2879.32	229.812	3417.11	313.76	2816.66	228.349	2127.48	194.943	2486.25	65.031	3826.53	143.5	4055.96	167.384	5662.74	136.183	818.994	186.157	1353.29	212.672	4255.63	145.689
-0.519481		4189.61	192.568	1313.48	183.903	2945.85	157.354	2928.19	346.865	3011.3	208.958	4225.56	571.167	3642.37	143.882	2325.02	474.432	1992.95	188.245	3196.82	247.224	4164.14	433.456	3362.2	239.514	2828.3	278.734	3074.37	106.119	4548.58	248.676	4868.57	288.674	6468.02	171.869	1063.19	264.432	1744.74	252.589	4621.02	197.944
-0.454545		4976.04	266.395	1681.07	288.296	3576.99	193.631	3341.74	441.193	3647.43	270.371	4830.52	684.489	4122.28	198.624	2708.21	636.537	2212.81	316.256	3450.58	387.987	4841.49	547.796	3906.73	325.082	3247.63	356.992	3711.89	145.631	5662.06	332.254	6087.4	376.976	7341.41	256.576	1390.54	321.249	2121.07	545.069	5173.02	249.477
-0.38961		6009.29	381.111	1964.89	473.446	4213.86	327.05	3739.73	633.468	4592.86	450.456	5454.78	835.135	4694.93	297.089	3403.66	865.62	2801.14	373.871	3997.11	513.017	5540.56	734.625	4303.32	450.704	3603.89	443.344	4307.12	229.498	6710.21	491.12	7195.68	483.425	8047.36	310.809	1607.73	372.446	2514.53	793.577	5843.34	324.628
-0.324675		7423.28	556.459	2383.59	711.011	4797.61	439.46	4246.49	784.131	5360.74	686.881	5636.05	870.724	5186.93	439.783	4152.9	1204.67	3489.04	465.31	4615.02	813.307	6447.47	907.108	4972.46	545.515	4092.04	555.501	5327.09	429.275	7688.9	657.202	8550.36	714.492	8960.71	492.483	2102.79	580.303	2918.84	1115.46	6489.74	551.941
-0.25974		8533.36	897.885	2977.7	1413.55	5495.19	742.664	4912.88	1023.82	6142.68	997.636	6261.92	985.251	5940.28	639.791	4622.21	1928.44	4013.7	657.79	5136.75	1298.74	7236.88	1262.37	5640.52	700.921	4699.19	668.966	6562.07	655.448	8822.46	1102.68	10075.7	1008.43	9801.43	844.007	2628.35	1294.99	3531.51	1782.42	7146.73	886.729
-0.194805		9242.7	1907.71	3636.77	3047.4	6140.7	1718.72	5324.78	1605.72	7388.69	1621.27	6484.41	1611.52	6596.59	1151.26	5348.31	3363.84	4583.11	1308.25	5551.8	2254.02	8083.74	2201.1	6554.52	1141.55	5417.05	1224.07	7780.61	1496.89	10115.8	2085.84	11633.5	2018.81	10885.4	1539.4	3218.16	2936.42	4203.38	3453.51	8202.86	1751.36
-0.12987		9788.04	3823.27	4209.1	5919.23	6959.24	3102.64	5901.42	2799.47	8568.65	3145.7	7021.09	2441.2	7031.13	2299.56	6479.7	5629.75	4922.56	2775.57	5980.48	3670.3	9010.24	3723.94	7855.99	2064.57	6581.11	2473.42	8812.29	3305.57	11586.4	3927.36	12964.5	3731.41	12033	2922.69	3804.12	5561.5	4853.71	5541.41	9034.45	3149.53
-0.0649351		10446.6	5966.93	4818.87	9118.63	7491.75	4355.29	6524.83	4512.23	9716.12	5685.32	6835.62	3619.49	7382.42	4244.15	7705.51	8208.1	5559.28	4403.23	6353.33	4955.18	9604.09	5804.16	8220.08	3141.24	7259.79	4104.59	9896.55	5477.33	12707	5425.33	13753.4	5683.1	13009	5364.34	4200.74	7855.44	5393.31	7354.15	9385.34	4588.21
0		11422.7	7272.39	4707.84	9818.13	6801.7	4399.21	7072.59	5200.86	10764.9	7211.81	6184.2	3826.57	7558.59	5784.52	8525.78	9087.68	5836.19	5206.87	6438.27	5031.51	10331.2	6781.4	8176	3530.77	7433.95	5276.13	10400.5	6710.55	13261	5672.36	14184	6254.76	13183.8	7799.79	4330.63	9067.51	5386.13	7369.07	9083.72	5062.56
0.0649351		11954.8	6303	4375.09	7798.43	6142.3	3180.02	7086.3	4600.09	10274	6375.41	5542.55	3172.27	6991.62	5477.69	8968.12	7633.34	5899.69	4520.61	6145.15	3765.44	10148.9	6174.93	7606.02	3118.06	6740.12	4787.12	10266.8	5607.95	13062.9	4502.14	13477.4	5156.74	12964.3	7672.2	3870.84	7247.82	4851.64	5424.47	8438.28	4421.85
0.12987		11827.4	4128.87	3887.34	4821.81	5572.02	1800.81	6616.84	3163.81	9522.36	3936.04	5076.47	2293.7	6055.14	3817.25	8730.33	5119.77	5348.99	2953.25	5815.67	2160.58	9305.12	4302.4	6971.6	2101.52	5580.1	3207.54	9318.81	3517.39	12333.9	2764.54	12180	3103.46	11772.7	5919.92	3359.38	5021.87	3702.03	2989.9	7722.51	3185.8
0.194805		11195	2472.72	3354.93	2225.92	5330.92	779.775	6163.15	1720.92	8008.59	1687.07	4711.71	1357.88	5153.68	1979.46	8406.69	2941.96	4551.38	1492.95	5517.61	1212.57	8445.94	2326.93	6123.52	1111.59	4489.27	1752.43	8157.63	1817.78	11699.4	1366.62	10914	1465.7	10613.5	3352.66	2760.87	2526.28	3061.93	1381.61	6922.99	1624.18
0.25974		10364.4	1552.86	3102.79	1331.74	4779.78	417.581	5345.59	877.099	6899.29	712.139	4380.27	716.632	4207.39	871.577	8127.64	1628.65	3934.88	696.198	5166.56	800.618	7454	1201.88	5443.29	578.987	3888.53	851.08	7192.26	1004.91	11072	789.927	9665.74	604.107	9782.33	1622.25	2360.3	1323.64	2426.07	638.349	6274.15	755.597
0.324675		9186.29	1157.36	2951.49	873.449	4360.4	305.625	4830.3	563.182	5732.19	371.488	3957.27	337.039	3409.27	421.18	7684.04	837.184	3316.77	441.465	4885.54	596.113	6816.62	768.419	4758.58	344.596	3266.8	461.615	6459.64	729.365	10595.8	650.295	8644.28	375.086	8664.98	936.296	2199.08	902.517	1979.39	364.035	5977.73	344.117
0.38961		8409.97	817.072	2653.88	585.65	3953.97	329.339	4162.82	438.808	4830.27	206.355	3554.25	205.943	2723.48	278.033	7126.15	512.905	2794.99	340.192	4439.24	398.286	6159.86	615.516	4046.16	254.162	2918.89	333.458	5830.26	541.296	9779.99	513.049	7496.5	248.861	8059.06	686.393	1951.79	640.438	1406.52	218.494	5718.12	226.418
0.454545		7641.93	536.833	2333.68	334.279	3597.34	281.236	3475.89	361.11	4380.71	124.766	3254.55	149.781	2473.17	198.078	6356.4	363.852	2448.5	231.365	4017	251.84	5267.64	426.069	3584.45	203.323	2637.22	219.958	5078.78	283.82	8709.29	399.378	6486.73	178.138	7320.15	430.743	1722.31	431.942	1158.57	141.494	5245.93	142.255
0.519481		6952.55	397.573	2127.86	174.139	3200.61	245.375	3015.86	271.449	3740.83	110.293	2806.28	84.435	2355.53	138.546	5404.15	270.502	2129.08	175.771	3596.38	160.463	4427.06	303.222	3211.14	172.499	2247.81	121.888	4587.25	136.834	7756.19	294.645	5356.06	126.864	7007.35	327.656	1509.97	298.08	964.063	79.717	4708.01	95.679
0.584416		6043.87	320.571	1937.52	153.274	2941.3	181.984	2466.63	186.548	2900.28	81.11	2211.84	69.427	2104.2	57.593	4355.65	165.546	1866.06	144.443	3124.06	121.215	3847.21	270.914	2936.7	151.33	2017.27	101.141	4043.54	96.731	6409.9	245.066	4465.33	110.717	6742.29	219.921	1296.42	165.088	893.513	56.496	4032.07	50.53
0.649351		5411.83	270.383	1559.47	85.647	2532.46	65.592	2115.85	104.554	2115.37	54.231	1664.17	71.293	1847.63	81.661	3661.59	78.135	1656.13	105.548	2532.73	99.64	3235.29	198.616	2574.98	127.203	1720.54	72.999	3440.75	52.415	5622.8	200.551	3751.4	99.376	5966.76	166.912	1062.67	118.395	927.425	83.342	3427.42	91.768
0.714286		4597.45	230.991	1334.83	86.389	2297.97	56.741	1730.39	113.605	1454.33	40.727	1272.44	47.282	1652.23	64.012	3085.79	47.455	1512.64	85.196	2075.91	127.144	2644.23	140.917	2408.08	122.905	1585.26	69.929	2934.12	32.637	5115.81	169.171	3229.82	73.465	5058.36	186.506	915.338	92.669	822.706	82.637	2920.35	115.776
0.779221		3989.45	178.42	1130.01	75.274	2071.77	43.706	1370.86	90.067	1116.64	65.961	1141.36	33.666	1444.61	51.387	2742.46	41.07	1031.71	84.331	1791.94	54.856	2083.09	90.914	2182.86	138.575	1372.67	60.147	2560.48	48.564	4481.97	125.106	2679.05	63.758	4033.83	160.725	764.94	70.647	648.598	64.807	2422.7	79.725
0.844156		3440.85	126.8	897.348	52.715	1923.51	49.259	1105.94	73.916	958.99	37.303	931.522	36.457	1225.8	48.063	2058.86	35.153	806.477	27.295	1418.91	42.593	1546.09	47.933	1804.59	118.921	1252.02	24.522	2220	6.607	3675.43	163.743	2136.02	37.712	3210.93	129.102	735.19	55.331	555.566	24.962	1992.97	49.567
0.909091		2991.26	137.107	778.069	44.275	1858.28	34.073	997.142	60.51	917.358	5.505	743.728	28.186	1134.43	30.105	1706.08	34.247	834.222	59.767	1284.61	58.032	1152.75	29.502	1409.21	94.42	1231.85	40.234	1897.54	17.965	2786.84	119.477	1762.42	51.177	2714.01	140.793	643.34	51.025	504.307	20.323	1614.77	0.266
0.974026		2704.14	118.346	532.415	55.796	1565.34	54.946	792.096	6.231	609.743	17.661	584.112	31.998	976.33	33.436	1259.14	10.305	569.353	65.897	1146.42	54.619	818.293	56.59	1305.62	50.624	991.412	44.786	1607.58	23.367	1945.88	117.045	1487.37	30.371	2274.77	107.874	537.988	24.167	349.991	56.737	1297.78	73.682
1.03896		2379.09	83.944	408.637	32.44	1490.34	38.948	668.47	7.391	333.636	21.974	493.018	47.417	900.484	37.342	916.037	0	451.943	27.817	923.19	41.797	789.286	0	1104.14	34.223	810.561	40.998	1437.22	41.622	1378.06	70.962	1200.79	35.131	1942.76	64.724	380.385	61.667	278.023	22.373	1055.48	73.516
1.1039		1998.68	86.112	308.989	35.491	1336.41	41.853	461.53	16.199	154.261	9.524	157.846	29.804	778.953	39.312	576.201	17.985	272.316	29.513	526.012	34.846	773.235	60.669	844.529	50.223	763.843	69.847	1424.51	20.143	841.305	69.924	998.135	40.598	1583.32	41.474	322.786	16.98	359.142	18.459	949.44	57.467
1.16883		1511.62	97.274	137.409	12.177	1212.14	0	274.547	27.473	143.503	30.037	195.195	39.117	706.095	12.523	390.694	11.882	284.943	29.447	425.125	24.724	807.184	20.079	596.204	27.858	794.739	12.94	1530.93	20.652	430.895	102.707	882.737	35.492	1367.41	125.528	190.705	5.646	310.943	15.987	793.417	0
1.23377		1030.91	63.53	67.324	5.014	1134.63	50.479	118.806	24.674	161.521	30.855	178.402	45.905	455.093	20.23	347	2.168	138.129	20.558	194.736	0	909.266	13.927	343.29	0	687.649	25.34	1372.11	29.261	228.002	110.183	690.1	23.653	940.837	93.071	103.377	0.006	222.025	24.473	737.038	6.032
1.2987		778.793	55.25	22.532	0	919.484	41.797	0	26.568	70.212	0	0	0	280.844	27.547	194.482	9.105	0	0	0	38.192	683.434	39.353	0	19.708	411.696	0	1397.74	0	73.699	94.596	464.515	48.373	715.077	58.413	0	2.482	0	19.295	662.341	38.482

## Sheet: ΔG2(D3-dC) 200 nM
Figure 4-source data 1
Figure 4C and Figure 4-figure supplement 2
Non-normalized values
	ΔG2(D3-dC) 200 nM
Chromosome sample		1		2		3		4		5		6		7		8		9		10		11		12		13		14		15		16		17		18		19		20
		DAPI	hCAP-H2	DAPI	hCAP-H2	DAPI	hCAP-H2	DAPI	hCAP-H2	DAPI	hCAP-H2	DAPI	hCAP-H2	DAPI	hCAP-H2	DAPI	hCAP-H2	DAPI	hCAP-H2	DAPI	hCAP-H2	DAPI	hCAP-H2	DAPI	hCAP-H2	DAPI	hCAP-H2	DAPI	hCAP-H2	DAPI	hCAP-H2	DAPI	hCAP-H2	DAPI	hCAP-H2	DAPI	hCAP-H2	DAPI	hCAP-H2	DAPI	hCAP-H2
Distance (µm)
-1.2987		0	0	930.102	150.028	0	44.285	0	21.047	0	0	1706.53	93.569	168.845	75.173	449.657	0	0	42.513	656.267	36.584	1516.04	132.378	0	9.232	0	57.316	0	13.156	352.74	45.461	68.131	96.986	180.103	63.277	52.183	4.746	618.029	9.936	0	0
-1.23377		26.451	36.499	927.878	151.329	118.734	79.292	179.122	33.76	174.667	2.174	2248.6	169.281	232.154	90.29	515.411	90.236	79.057	25.09	711.159	50.263	1576.74	129.05	49.787	0	76.981	63.097	62.766	42.86	422.403	26.604	35.081	68.222	178.545	75.011	0	8.623	483.299	0	25.465	1.599
-1.16883		271.417	40.456	982.755	169.187	241.256	61.206	454.888	47.334	329.052	15.477	2361.01	192.228	347.484	108.781	535.358	109.647	190.995	73.265	762.305	71.104	1877.34	150.898	250.849	40.104	146.836	65.132	54.864	43.487	532.097	0	0	43.464	348.854	60.485	78.46	29.944	488.801	25.191	213.803	22.932
-1.1039		476.741	57.394	977.162	151.38	359.043	0	565.307	0	422.328	20.339	2783.49	233.984	553.978	96.289	828.003	76.694	140.764	84.647	756.972	115.47	1734.16	212.737	377.332	43.85	302.001	124.101	26.746	67.38	522.253	80.867	51.624	59.059	402.609	71.185	107.722	36.245	674.576	99.705	431.799	105.063
-1.03896		732.016	88.429	956.307	95.46	394.986	39.755	709.227	11.908	558.997	16.022	3147.19	315.259	946.026	95.872	1159.91	82.42	99.472	38.425	848.635	138.847	1769.61	153.138	496.427	41.557	474.402	141.777	79.997	84.46	531.389	67.562	97.472	49.849	399.28	61.102	130.305	38.489	670.409	144.312	447.563	125.994
-0.974026		940.164	101.732	995.608	73.448	430.029	22.412	909.569	47.109	725.218	3.953	3657.47	411.273	1217.46	86.415	1336.3	103.767	193.481	57.805	926.772	121.647	2022.43	153.56	582.045	43.585	572.813	172.1	83.369	80.089	547.731	95.881	119.133	31.047	576.804	46.368	162.555	82.896	803.625	172.168	513.738	95.461
-0.909091		931.636	99.273	1036.41	64.789	498.263	49.086	1132.46	48.201	833.568	68.393	4185.99	468.872	1566.44	128.943	1657.05	100.36	321.032	64.842	902.749	135.057	2029.2	141.887	778.285	80.305	720.184	233.345	97.077	60.497	526.901	132.915	241.45	13.819	650.87	43.502	190.974	111.86	1025.59	217.852	781.594	133.078
-0.844156		1276.35	108.471	1112.3	79.017	716.884	109.435	1603.44	53.311	945.189	53.966	4668.99	496.944	2096.3	222.087	1981.75	108.135	274.383	0	849.946	131.651	2185.87	182.678	889.157	119.975	932.507	214.747	182.093	76.638	495.825	152.551	335.753	65.899	808.589	111.098	323.79	112.754	1127.68	237.95	892.9	190.727
-0.779221		1458.31	141.788	1225.88	133.517	933.011	154.17	1901.96	74.226	1184.37	123.373	5083.58	574.067	2473.56	254.895	2328.91	107.681	685.314	129.084	937.115	173.104	2199.67	213.63	1006	186.881	1041.89	267.907	214.162	114.051	604.644	182.559	511.713	119.857	965.933	86.18	387.267	162.494	1190.38	283.229	1111.57	187.414
-0.714286		1792.78	165.299	1297.41	167.559	1251.42	180.408	2430.74	108.757	1277.27	123.327	5578.11	757.379	2981.74	300.328	2965.34	111.538	881.913	152.75	1091.2	189.216	2386.55	223.837	1289.58	186.233	1275.94	331.771	262.607	128.26	718.549	178.211	713.677	132.418	1055	147.19	408.94	183.894	1360.22	328.539	1280.15	222.66
-0.649351		2049.58	185.724	1320.57	175.676	1383.61	201.231	2937.88	126.521	1526.7	145.814	5835.1	963.289	3455.26	389.009	3661.2	228.36	1154.35	137.765	1221.15	188.203	2368.96	198.382	1600.83	192.675	1402.92	378.328	359.094	148.214	795.172	291.539	1065.18	140.306	1301.31	163.819	472.756	219.497	1551.22	424.689	1508.71	255.436
-0.584416		2098.47	223.932	1477.12	241.412	1647.51	298.038	3417.49	184.029	1827.65	199.989	5807.85	1151.38	4130.67	451.224	4303.49	235.684	1449.36	192.761	1402.54	220.533	2533.61	224.719	1879.5	251.435	1488.88	367.989	453.539	161.689	1018.68	323.566	1647.37	203.367	1408.63	167.411	633.445	259.869	1935.96	589.628	1642.29	292.288
-0.519481		2384.04	324.615	1767.97	349.642	1869.03	439.412	3899.75	237.607	2081.59	291.595	5968.24	1428.57	5091.92	535.89	4932.7	318.669	1756.93	236.911	1574.71	293	2710.7	270.386	2181.48	350.48	1592.26	503.693	573.53	254.12	1272.65	374.24	2340.93	288.959	1572.3	242.654	803.908	329.033	2484.78	764.397	1845.34	320.967
-0.454545		2805.4	449.288	2053.94	527.304	2212.75	623.666	4316.1	322.759	2302.69	381.748	6043.26	1751.04	5707.98	707.109	5879.74	451.49	2089.54	300.663	1668.45	364.311	2776.83	366.886	2364.74	519	1972.79	655.14	682.665	351.631	1602.99	503.339	3067.65	409.562	1811.08	392.742	1001.06	441.673	3105.8	1001.41	1997.38	441.741
-0.38961		3372.12	648.481	2531.64	823.937	2648.65	833.863	4635.9	391.682	2431.61	552.707	6363.01	2259.16	6285.45	912.463	6605.66	738.307	2319.15	379.52	1830.35	511.59	2821.39	512.695	2590.39	809.223	2442.76	950.532	877.821	480.335	1762.25	751.354	3722.05	709.603	2039.4	585.035	1069.65	554.87	3826.63	1236.93	2089.68	574.68
-0.324675		3668.9	987.265	3044.56	1144.41	2995.58	958.92	5294.42	572.759	2771.1	652.614	6605.22	3012.1	6987.61	1215.42	7919.61	974.488	2535.81	571.395	1966.78	674.603	3045.78	777.254	2850.64	995.963	2565.52	1223.47	1037.09	803.833	2214.04	868.974	4531.67	1114.15	2466.95	753.143	1204.04	731.231	4626.98	1671.04	2271.22	706.986
-0.25974		4403.65	1295.95	3466.77	1610.69	3263.53	1563.47	5575.68	1084.23	2840.74	924.399	6482.63	4039.15	7654.21	1903.85	8216.86	1501.08	2741.68	1133.65	2164.08	845.749	3025.28	1061.24	3174.34	1316.41	2915.27	1688.97	1462.33	1275.6	2672.56	1077.61	5512.35	1644.39	3057.92	1139.9	1421.4	1066.3	5549.26	2652.22	2539.94	1068.08
-0.194805		4710.33	1891.19	3717.09	2592.9	3725.38	2668.44	6115.94	2036.38	2922.57	1507.77	6794.56	5369.69	8354.76	3222.72	8707.59	2765.31	3165.33	2444.9	2572.64	1357.45	3184.77	1465.36	3435.95	1972.24	3302.46	2973.74	1787.17	2271.44	3159.53	1802.5	6374.54	2489.41	3671.71	1852.82	1703.68	1918.73	6677.05	4462.65	2922.31	1769.66
-0.12987		5344.75	3607.94	4019.5	4196.93	3997.96	4811.88	6953.16	3565.27	3281.36	2850.65	7039.25	7862.67	8897.56	4994.8	8917.78	5558.96	3580.02	4892.21	3039.67	2306.63	3031.73	2338.76	3839.56	3670.93	3637.57	5406.1	1972.72	3769.73	3635.62	3182.68	7209.33	3895.95	4138.96	3338.3	1865.76	3358.19	7868.79	6700.92	3329.06	2932.1
-0.0649351		5652.81	6100.53	4024.79	5958.8	4407.92	6724.19	7708.83	5056.17	3572.66	4253.56	7278.73	10747.9	9228.06	6460.93	8582.39	8670.61	4403.46	7518.77	3220.43	3350.88	3355.67	3598.52	4014.47	6283.38	3723.46	8000.99	2108.47	5414.79	3834.51	4915.95	8022.2	4841.1	4487.53	5121.14	2053.11	5008.05	8248.9	8807.12	3712.97	4668.21
0		5695.14	7748.8	3540.94	6362.28	4293.56	7086.71	8258.16	5617.78	3670.24	4951.31	7214.83	12284.6	9309.56	6970.15	7712.44	10276.5	5175.65	8567.17	3132.88	3738.5	3251.49	4481.91	4189.54	8349.45	3514.11	8787.32	2237.76	6132.94	3646.88	6126.23	8663.44	4851.52	4591.14	6036.11	2217.2	5787.73	8342.14	9416.96	4011.58	5665.69
0.0649351		5276.22	7066.22	3037.88	5057.37	4243.26	5681.58	7890.04	4782.52	3336.92	4347.47	6489.36	10541.5	8901.7	6423.09	6493.78	8714.6	5281.18	7491.72	2759.56	3229.43	3377.12	4178.46	4260.55	8019.83	3254.2	7167.57	2099.94	5239.86	3432.43	5501.66	8567.36	3656.9	4306.88	5127.39	2319.19	4924.22	7997.23	8258.14	4085.28	5655.68
0.12987		4582.95	4804.17	2539.63	3095.28	3717.42	3511.1	7138.26	3385.81	2998.49	2685.53	5896.95	6707.95	8159.66	5101.2	5429.88	5417.3	4900.61	4988.17	2371.21	2205.22	3130.08	3246.56	4167.47	5736.77	3036.33	4207.75	2000	3517.47	2907.2	3601.39	8282.91	2464.45	3828.98	3314.01	2286.96	3407.72	7202.25	6301.07	3946.56	4204.36
0.194805		4284.48	2427.83	2040.01	1577.95	3183.41	2040.81	6398.01	2207.16	2635.52	1369.06	4807.55	3549.68	7117.72	3422.07	4353.11	2457.97	4299.57	2862.3	2153.26	1158.3	2839.79	2043.06	3938.96	3190.57	2956.34	2112.67	1927.44	1914.24	2565.78	2001.25	7682.7	1592.85	3250.18	1873.55	2105.56	2023.89	6914.21	4440.96	3616.42	2630.32
0.25974		4087.25	1327.05	1690.87	897.471	2673.93	1166.94	5686.02	1633.42	2149.41	759.009	4580.64	1826.15	5953.11	1976.24	3670.53	1194.58	3850.45	1787.09	1853.28	608.847	2450.69	1260.72	3692.22	1682.67	2669.36	1187.37	1859.19	947.046	2220.69	1020.79	6627.11	1132.34	2799.82	1073.55	1992.1	1149.45	5841.3	3029.56	3344.46	1568.86
0.324675		3855.03	729.77	1482.41	576.94	2099.45	748.272	5153.9	1272.14	1858.62	486.076	4118.92	1062.58	4962.18	1083.17	3045.35	724.165	3466.21	1277.6	1617.3	456.758	2044.65	750.256	3363.62	1109.41	2271.81	997.584	1742.08	613.164	2071.15	717.517	6161.76	689.772	2562.73	673.728	1767.25	813.498	4979.79	2143.4	3128.71	1146.73
0.38961		3481.1	655.227	1370.16	344.102	1778.92	608.857	4742.92	937.389	1585.94	363.007	3586.9	683.328	4136.46	620.168	2447.87	480.606	3363.41	893.362	1243.1	411.295	1817.59	423.11	2953.97	941.2	2014.67	789.54	1676.86	511.073	1940.86	631.115	5619.53	451.949	2466.81	562.371	1559.21	683.757	4357.84	1686.07	3102.21	1008.22
0.454545		3242.35	447.824	1289.84	242.448	1392.92	460	4127.64	683.561	1454.5	301.447	2762.09	391.395	3519.35	426.782	2023.62	420.684	3091.16	606.793	947.648	402.4	1638.99	216.736	2795.63	757.592	1802.41	524.032	1574.59	430.066	1601.1	520.161	4882.42	300.063	2372.48	397.367	1471.25	562.636	3719.57	1309	2780.28	758.494
0.519481		2897.14	281.013	1168.33	221.96	1163.92	308.761	3537.02	442.153	1343.43	182.136	2231.68	234.7	2999.49	339.024	1597.08	337.694	2878.34	436.439	827.273	265.708	1460.18	111.361	2606.18	519.537	1584.5	303.604	1334.89	298.813	1374	376.5	4176.14	247.785	2199.02	280.505	1414.12	403.335	3326.71	1074.8	2461.01	516.33
0.584416		2812.96	267.897	971.994	179.233	1022.87	221.074	2922.51	308.377	1186.44	144.111	1829.6	137.897	2643.85	303.597	1326.78	286.681	2390.49	376.588	753.105	181.771	1281.11	96.155	2197.02	313.916	1478.31	254.805	1102.18	188.503	1120.13	330.571	3533.82	178.613	1882	212.147	1371.47	303.754	2572.33	976.949	2181.14	392.899
0.649351		2583.09	281.523	760.335	146.948	1033.74	161.523	2571.91	239.468	1113.24	122.229	1405.49	149.027	2387.15	234.831	902.059	182.09	2285.42	350.604	561.505	153.914	1074.42	32.58	1888.17	268.259	1293.97	187.658	966.026	146.33	789.678	235.965	3024.7	87.873	1729.58	171.455	1200.63	220.213	2193.33	820.924	1906.31	326.762
0.714286		2403.56	311.797	598.881	131.434	984.598	169.836	2182.3	206.675	882.77	65.346	1181.43	161.324	2174.04	189.097	785.074	175.225	2101.73	300.846	485.327	173.847	874.225	48.67	1541.06	204.342	1116.8	142.671	983.369	113.081	565.998	188.132	2496.07	125.673	1546.39	151.314	1020.27	187.494	1892.62	719.358	1779.85	226.126
0.779221		2403.02	210.769	457.704	134.573	735.857	160.21	1974.5	168.787	701.107	63.811	1063.49	120.028	1869.13	169.632	416.744	88.793	1949.76	298.915	394.991	144.438	776.67	61.715	1475.62	183.516	883.785	126.816	969.97	119.482	353.765	204.756	1973.31	148.414	1162.57	129.334	949.959	176.377	1680.74	795.572	1516.15	198.447
0.844156		2220.58	204.279	331.352	123.727	554.918	113.857	1754.1	148.176	614.495	67.404	964.21	94.123	1567.25	148.978	297.703	70.923	1743.49	247.614	316.781	93.47	438.705	77.343	1418.58	129.059	736.363	76.842	864.169	87.722	277.772	162.389	1576.13	123.301	822.648	107.621	794.048	125.802	1312.03	621.973	1445.97	169.411
0.909091		2173.3	185.59	256.693	84.392	473	149.312	1466.01	148.166	479.67	55.798	881.462	76.057	1317.38	126.262	237.514	65.512	1585.21	229.331	203.908	56.124	356.419	2.833	1120.44	115.946	506.941	48.826	716.827	67.411	186.092	139.794	1374.77	35.318	606.724	103.336	671.811	104.1	1038.09	488.835	1279.3	130.915
0.974026		2028.76	181.677	147.113	62.809	479.349	94.882	1228.07	115.648	468.394	12.609	748.099	67.347	1046.88	129.948	181.726	53.269	1483.01	207.767	105.067	80.962	338.559	0.312	968.277	128.415	504.178	54.094	553.145	84.27	113.556	111.988	1139.44	45.975	436.22	62.399	653.949	77.443	828.422	416.491	1012.12	149.838
1.03896		1892.76	182.777	78.784	43.164	392.043	61.548	1036.33	138.738	504.896	65.133	670.963	17.472	773.594	94.261	94.132	64.131	1287.15	146.658	168.911	72.895	192.145	26.048	833.528	92.557	385.721	27.722	361.931	31.344	104.136	99.383	959.447	41.981	231.039	36.768	571.287	110.933	583.177	400.46	853.816	133.542
1.1039		1801.97	179.251	84.415	10.625	282.939	40.823	781.334	91.998	345.968	19.433	559.849	12.568	533.227	46.847	109.397	86.923	1280.36	119.904	201.953	0	88.391	0	681.787	49.072	318.961	40.993	354.45	10.104	169.681	92.051	827.819	52.72	157.02	32.219	517.577	102.914	547.722	365.07	771.703	134.461
1.16883		1512.71	192.243	70.778	8.21	271.415	44.197	797.214	96.439	206.18	48.692	346.633	13.693	308.373	35.278	111.532	50.991	1027	165.571	215.972	8.247	52.929	4.352	614.078	54.064	207.128	22.903	233.69	50.114	22.535	61.291	745.003	32.872	193.564	18.9	427.02	18.98	289.874	267.103	651.204	110.735
1.23377		1244.53	167.652	15.727	0	219.19	19.632	592.524	107.534	145.187	48.909	183.646	19.425	165.078	25.021	13.841	40.923	958.871	145.44	104.699	43.317	57.297	25.802	473.026	72.201	169.531	15.082	146.08	0	50.285	57.203	747.107	45.015	33.643	0	401.66	0	85.921	192.45	501.897	87.878
1.2987		1150.37	130.176	0	11.312	42.918	36.19	381.428	55.599	56.135	46.59	0	0	0	0	0	0.608	896.993	131.882	0	15.212	0	17.127	370.046	77.817	31.531	0	97.901	34.101	0	12.501	529.459	0	0	27.79	305.649	43.137	0	213.458	452.487	53.216
