# Supplementary material for: Molecular dissection of condensin II-mediated chromosome assembly using in vitro assays
Source: eLife journal article supplement (doi:10.7554/elife.78984), 2022-08-19
Supplement: supp [file Figure 5-source data 1.xlsx]

## Sheet: Figure 5C
Figure 5-source data 1
Figure 5C
		Raw intensity values
		buffer
		DAPI (overall)	hCAP-H2 (overall)	hCAP-H2 (axis)
Chromosome cluster
1		50421605	0	0
2		171927942	224100	77427
3		103572343	265624	12206
4		161542471	775991	445896
5		67655968	70328	0
6		66594353	168695	0
7		67811392	0	0
8		138307772	0	0
9		303601457	831362	417664
10		84724488	129204	65049
11		288508303	1615469	713501
12		57137334	217749	43621
13		238165955	4216374	1191627
14		313439465	5637716	1657878
15		157358574	5714461	2565203
		holo(WT)
		DAPI (overall)	hCAP-H2 (overall)	hCAP-H2 (axis)
Chromosome cluster
1		278387438	53882476	48444520
2		105761935	18147989	15744419
3		393660033	115328868	102993596
4		172171223	25260144	22739013
5		198647071	22909852	19039492
6		131671721	47168073	42509830
7		179175610	65664978	54120777
8		64565832	13773825	11319392
9		236065869	59921693	50080686
10		97259969	19438958	17610926
11		251302494	38213950	33710829
12		624932313	94325959	83195844
13		246505202	42472066	38763283
14		119830496	24868024	20777629
15		132927947	32930910	30425986
		holo(H2-BC1D)
		DAPI (overall)	hCAP-H2 (overall)	hCAP-H2 (axis)
Chromosome cluster
1		1109699910	160825293	101429685
2		593571974	17897049	13408036
3		606222796	248322070	169415581
4		554034643	82330838	41531374
5		852820093	293295830	164017193
6		972128135	71178158	47763671
7		304389233	19928894	12651871
8		402290027	81748621	48682219
9		653900159	87345879	52314903
10		392731551	20354149	16409052
11		727095032	33584964	25211029
12		360095904	4630747	2853898
13		192849952	5578299	3553471
14		209752594	36717622	25052303
15		396065887	89480483	54740963
		holo(H2-BC2D)
		DAPI (overall)	hCAP-H2 (overall)	hCAP-H2 (axis)
Chromosome cluster
1		603562862	55533027	29991152
2		479236764	155639598	113415631
3		355662300	41765177	26746686
4		285618547	9316129	5260219
5		418882481	25854991	12752564
6		686386270	135808430	79123924
7		172897170	40981655	26230445
8		273749347	23238949	12569024
9		380120175	20321533	9036530
10		71237793	23615803	18804915
11		335858428	129133447	54202522
12		535640429	67625921	51134110
13		92111446	4394892	2134916
14		160915429	28668736	14107550
15		228502993	41774649	16575765
		holo(H2-BC1/2D)
		DAPI (overall)	hCAP-H2 (overall)	hCAP-H2 (axis)
Chromosome cluster
1		952747244	7378457	4831019
2		951730778	8778017	2917804
3		1270403631	19698745	8525408
4		805016957	6476739	3295306
5		535780355	6452344	2856408
6		247161665	0	0
7		2097476673	14198764	8917502
8		497760442	4131452	2189366
9		165329447	0	0
10		391946418	509840	332088
11		2000840113	7189363	4365550
12		244811058	458285	206471
13		1945377539	13977042	3413059
14		2984292924	17382784	10143066
15		851326619	2619087	1454807
