# Supplementary material for: Molecular dissection of condensin II-mediated chromosome assembly using in vitro assays
Source: eLife journal article supplement (doi:10.7554/elife.78984), 2022-08-19
Supplement: supp [file Figure 6-figure supplement 1-source data 1.xlsx]

## Sheet: Figure 6-figure supplement 1B
Figure 6-figure supplement 1-source data 1
Figure 6-figure supplement 1B
		holo(WT)
		-ATP				+ATP
			Raw intensity values				Raw intensity values
		DAPI area (pixels)	DAPI (overall)	hCAP-H2 (overal)		DAPI area (pixels)	DAPI (overall)	hCAP-H2 (overal)
Chromosome cluster
1		66913	620967339	296041262		63858	646001132	370849722
2		86386	1105498425	384633889		58225	593598108	329459486
3		91017	1225695945	603000712		53043	599545198	278398518
4		93518	1166980708	526462688		58504	595927760	313143890
5		81883	888208098	585750962		57119	580459778	381393124
6		58840	778215882	444088872		44033	642412188	357529615
7		92545	888841880	376154093		64711	605308413	391070304
8		62386	772143109	513269021		51759	592787491	454213407
9		100975	912223587	573753088		58043	625265353	346773088
10		80743	849899360	518366744		52460	472747166	355878319
11		60077	779696062	631057675		57724	531241714	421401115
12		85028	1034756951	542585406		57678	528327635	391164723
13		75646	1041126725	684998305		48265	569039615	277292339
14		83136	1195859693	470517330		50656	618145817	417801857
15		74773	1138450776	398935006		49136	622986478	369491452
16		126770	1148336477	475926113		59491	594739440	449467263
17		70924	1029105126	423665776		54199	574451825	411950234
18		97718	1112827751	537321863		49859	573955361	379597798
19		78024	1132569849	543106062		57678	574633173	315099053
20		82490	1118629366	642701893		51761	572686925	432554128
		holo(D3-dC)
		-ATP				+ATP
			Raw intensity values				Raw intensity values
		DAPI area (pixels)	DAPI (overall)	hCAP-H2 (overal)		DAPI area (pixels)	DAPI (overall)	hCAP-H2 (overal)
Chromosome cluster
1		65092	1326842481	618232449		41164	733060025	761275625
2		81618	1193030908	519845414		40191	845431537	808666922
3		107043	1505929980	477549634		41157	816492936	744379738
4		115724	1501274166	627575695		41144	851981437	902672008
5		82879	1446371741	679505338		43438	785903494	732017948
6		104905	1729374385	590861024		45036	784777618	742960288
7		81039	1548992628	489880049		40879	698383639	659726822
8		100687	1504474396	731490216		39677	732095210	696231784
9		77456	1437596483	677032951		42381	859840454	839888685
10		75383	1220514500	504657982		40626	800481665	657670505
11		74528	1316342831	519130522		39235	785728861	717145048
12		106965	1357597139	566802182		42248	720412144	665013609
13		102457	1157409644	741456716		44590	828984359	823576490
14		86494	1290662485	456700282		42238	821867619	830026950
15		109074	1455768581	659449593		38180	770285546	772654878
16		84625	1264197576	562051308		41889	756977460	915619936
17		82193	1156719605	557613593		34016	573244328	674841030
18		82999	1122568985	807805164		41064	743192234	991054329
19		86825	1128665175	763951175		41102	783996822	820277944
20		111730	1046954580	575753143		39561	623236165	814029640
