# Supplementary material for: Molecular dissection of condensin II-mediated chromosome assembly using in vitro assays
Source: eLife journal article supplement (doi:10.7554/elife.78984), 2022-08-19
Supplement: supp [file Figure 6-figure supplement 1-source data 2.xlsx]

## Sheet: Figure 6-figure supplement 1D
Figure 6-figure supplement 1-source data 2
Figure 6-figure supplement 1D
		holo(WT)
		-ATP				+ATP
			Raw intensity values				Raw intensity values
		DAPI area (pixels)	DAPI (overall)	hCAP-H2 (overal)		DAPI area (pixels)	DAPI (overall)	hCAP-H2 (overal)
Chromosome cluster
1		96640	1674626305	148282692		63074	605877474	74108526
2		81188	984848504	131861282		60469	606498514	104512845
3		82164	1348422503	156722896		54711	575460692	74813706
4		102894	1428803298	142603994		67864	1002375470	123050828
5		68314	1470548511	179583150		63058	609504036	76986012
6		113777	1324634314	69435020		97143	670090994	77263699
7		90686	1309494676	77490245		89693	847178088	93886482
8		88901	1497188321	137791966		49183	619291756	88909750
9		74654	1152083047	192205875		64942	636578432	78505660
10		117758	1768306191	102761501		62470	718516960	82395486
11		95723	1199026158	164603531		74562	867424016	121478386
12		92251	783355034	101838979		74964	748381641	110750923
13		100959	1209310022	131415555		54625	604927263	93869255
14		72193	1513063325	256586827		88639	833710018	94678859
15		61219	806383410	148745122		64097	760063803	91975708
16		81786	1938472591	225044511		58381	795977185	103178203
17		94869	1221267430	123081750		67073	788056088	101454322
18		120922	1234177400	24770045		78879	843838184	100438154
19		118445	1538504309	165676559		74147	814697906	92460463
20		108248	2212426838	158432375		93239	749008816	82418357
		holo(H2-BC1D)
		-ATP				+ATP
			Raw intensity values				Raw intensity values
		DAPI area (pixels)	DAPI (overall)	hCAP-H2 (overal)		DAPI area (pixels)	DAPI (overall)	hCAP-H2 (overal)
Chromosome cluster
1		81645	794590533	2341315		79269	692363496	17388576
2		73498	604787555	25886675		57125	932086130	52348111
3		69968	601835397	21700239		59565	918364871	47416147
4		85427	887741223	2831782		67898	717015175	34971867
5		101185	689237083	4822311		83463	883782641	18486973
6		87852	540164307	9179594		86647	889894346	23802765
7		95853	559945407	6683045		74163	966675275	26548514
8		69567	569703056	46500077		84254	748837238	17109770
9		78010	533740521	7762089		81025	1001958968	35556153
10		70294	574113443	31195741		72546	821077684	17153263
11		73776	500403385	6742441		66173	811015921	38452624
12		114234	750639238	3597445		75297	943176430	7854147
13		99575	917938797	578446		64890	927944189	47847536
14		90332	785646500	682547		101704	1331611782	980384
15		84557	484666666	1264377		67010	689097354	18892333
16		82944	474564818	21211980		66702	711783418	32781297
17		88373	446632636	6972290		85992	990160644	25380668
18		79562	424804401	3395755		96555	859178557	11567468
19		76551	736638403	53738		76932	790009757	28836358
20		69394	580623154	12029266		66272	826410893	46868380
		holo(H2-BC2D)
		-ATP				+ATP
			Raw intensity values				Raw intensity values
		DAPI area (pixels)	DAPI (overall)	hCAP-H2 (overal)		DAPI area (pixels)	DAPI (overall)	hCAP-H2 (overal)
Chromosome cluster
1		84742	658052471	90412761		103801	647102879	4275636
2		91945	675177705	41752760		79937	661319995	8405756
3		88531	573179364	73771145		83834	614549213	10966692
4		81109	642743569	93052629		71402	678089746	44684335
5		74426	618316743	35708725		73748	1047267238	37087034
6		77367	574099379	61466114		102904	1108947405	28319090
7		80946	416721826	47663338		94619	886405928	13734
8		91666	630255281	19645456		62815	906386086	68499332
9		99434	675698938	49025523		82500	548950978	2871066
10		99911	719865866	42368974		63214	934313279	53839815
11		101504	580470157	5372264		68275	870951433	30413267
12		70150	552696653	49822569		114993	521251115	2217158
13		82890	897257050	90546872		71521	765490450	21613982
14		74594	487561029	34652610		86980	743913773	9123670
15		98720	884916688	24524642		90059	846850878	25015972
16		100849	700286331	42111779		75582	822924289	41882523
17		85412	692767426	98108004		64506	667006590	45197588
18		76103	596482325	70256454		65895	623486067	37150251
19		111218	505306746	7012149		73950	581205866	30669287
20		108266	710667600	26905590		100875	766662936	4277062
		holo(H2-BC1/2D)
		-ATP				+ATP
			Raw intensity values				Raw intensity values
		DAPI area (pixels)	DAPI (overall)	hCAP-H2 (overal)		DAPI area (pixels)	DAPI (overall)	hCAP-H2 (overal)
Chromosome cluster
1		72021	863206205	659658		91942	1055804223	89807
2		70337	974058926	59841		84199	1078844618	741373
3		65804	748005307	1160161		69421	948998887	1480939
4		74605	1120000493	787983		80470	1003719679	750576
5		108342	1095979137	164845		81947	836049312	216960
6		93275	1571792037	0		83078	969820261	973836
7		73396	982986919	1006004		102381	925214718	781221
8		98412	1307946972	3277786		114928	1022804329	285890
9		86175	722687182	721161		75024	877017067	562991
10		75044	827298806	1601069		72703	517729692	135583
11		73533	1063557728	2192674		89708	908304457	1562724
12		96991	744244760	53758		84275	800297641	275181
13		77867	812113393	132318		75653	658299524	563782
14		77006	752208461	126094		83206	819197814	396040
15		98607	876172365	2028626		111883	691836730	575803
16		88115	774265090	1281958		72174	673425359	228686
17		88147	874825398	994936		88102	701207576	1011557
18		105227	1012740669	805882		73136	700269892	70489
19		111912	797097592	772908		77281	650744498	48481
20		92798	867501549	615213		75690	787299702	0
