# Supplementary material for: Molecular dissection of condensin II-mediated chromosome assembly using in vitro assays
Source: eLife journal article supplement (doi:10.7554/elife.78984), 2022-08-19
Supplement: supp [file Figure 6-source data 1.xlsx]

## Sheet: Figure 6B
Figure 6-source data 1
Figure 6B
		buffer
		-ATP				+ATP
			Raw intensity values				Raw intensity values
		DAPI area (pixels)	DAPI (overall)	hCAP-H2 (overal)		DAPI area (pixels)	DAPI (overall)	hCAP-H2 (overal)
Chromosome cluster
1		73551	942849995	4081		80693	1282188092	0
2		93376	1650279264	821		83848	1031380669	415
3		84878	1976146012	279		80242	1350923205	209
4		101611	1801502463	807		106021	1143712536	667
5		115343	1000398305	238		83081	1239676200	313
6		82857	1091702468	452		92024	1399503926	954
7		91243	864511586	634		70844	1378099784	0
8		93094	1791465296	208		83030	1145975333	0
9		93999	1043972534	871		80902	1121796586	888
10		83356	1055583329	385		81836	1169267804	0
11		93009	1124855147	921		89658	1244522762	944
12		119813	1281525883	228		84828	1374280171	234
13		107429	1520965996	0		97765	1191746986	469
14		75612	1716983327	0		110337	1483378859	0
15		92195	1870459750	0		85971	1582344926	344
16		78424	1113658334	0		95012	1570577160	0
17		82464	1227075544	6272		86630	1646516740	0
18		102856	1848594543	283		104059	1352297204	0
19		114469	2164500653	0		102934	1345354976	395
20		117862	2153477189	686		90897	1297404696	0
		holo(WT)
		-ATP				+ATP
			Raw intensity values				Raw intensity values
		DAPI area (pixels)	DAPI (overall)	hCAP-H2 (overal)		DAPI area (pixels)	DAPI (overall)	hCAP-H2 (overal)
Chromosome cluster
1		65668	933900293	296262834		58205	968947500	179428627
2		93200	755588840	251504487		59718	812851590	216687634
3		86636	899371666	239055100		81847	859337125	235130020
4		83746	828782324	256499375		58031	865016078	111729744
5		81314	873653863	247150379		62297	821998536	221672614
6		98959	1293014675	223817116		53278	715787644	173049967
7		83624	940890033	267093114		59064	715620437	240593011
8		81404	1492286748	62480298		78406	633577128	217346442
9		89626	1810749515	314728289		38738	405127179	188476237
10		102599	1023488652	206047467		60505	989965228	235289768
11		106295	1333133312	248510123		98100	1753379703	219203078
12		64448	1074305491	251272677		68675	1282742822	238460036
13		72732	1113265691	240064070		67616	993698307	338829968
14		110568	1066592997	198542602		55677	585440213	225467857
15		83336	1166033126	233397406		55735	561202687	278925586
16		104787	1279905961	205649452		58573	757842792	184613183
17		95312	1502038143	158378731		58906	559550528	163403869
18		86121	914880351	145343918		63326	643473774	151973636
19		92162	1156170036	221431901		69509	866257572	253322381
20		88719	1139646864	195249353		49728	501335034	236767369
		ΔD3(WT)
		-ATP				+ATP
			Raw intensity values				Raw intensity values
		DAPI area (pixels)	DAPI (overall)	hCAP-H2 (overal)		DAPI area (pixels)	DAPI (overall)	hCAP-H2 (overal)
Chromosome cluster
1		83275	610193951	499		90108	735940691	8270648
2		95638	644263378	67252		84073	622623969	4654638
3		97666	919451093	492214		94580	624924138	506427
4		109271	1373959613	926817		66909	872227039	32420295
5		107547	743830252	515357		79641	663978228	14458722
6		106115	759521022	187265		78941	500950795	3577015
7		82112	803809084	320475		99069	711239039	62363
8		78297	1000897850	946		90312	1039130243	26754585
9		82833	951459253	1083882		67874	1037479176	28066228
10		91173	961421699	484		76278	878138312	47884618
11		106097	1111513166	44704		89895	1179287409	542047
12		79929	1178723056	716863		67943	585884415	1533634
13		78168	945652450	1019680		69191	799242867	17517807
14		106405	917539017	464054		77264	826547194	25768890
15		98535	992781773	728203		82622	871137015	11956793
16		92805	990013984	1360556		78023	1010108007	29592345
17		70742	990666049	3651930		88610	1356217608	22455101
18		73054	1424745830	1752461		65463	1021375862	49209287
19		91512	976638497	839472		73003	807969399	33079625
20		94082	1100681691	668311		64894	630934326	41380663
		ΔG2(WT)
		-ATP				+ATP
			Raw intensity values				Raw intensity values
		DAPI area (pixels)	DAPI (overall)	hCAP-H2 (overal)		DAPI area (pixels)	DAPI (overall)	hCAP-H2 (overal)
Chromosome cluster
1		78480	706688288	323557168		34075	546064847	550861834
2		73428	882344511	220719125		36123	547888129	436336173
3		90845	1275926315	166517104		49826	700628886	542800020
4		65816	1152740829	378121651		38536	630516340	474933281
5		75395	982552828	256575599		48892	897254878	654731112
6		78556	641636073	295730302		41987	672270086	476281222
7		102979	1094425275	187348629		39526	590980580	624049491
8		96764	1160681367	156162986		46515	1018816982	437652839
9		112894	905883907	210418316		40094	921155037	559525261
10		84000	838323633	295561955		42072	499799769	331485367
11		84672	723894161	365506979		32407	524393135	624455352
12		61019	365987268	106060138		32630	391807742	554386226
13		84362	760006159	230564308		34840	485991222	593589738
14		79820	711654551	226300708		39403	463705870	299174445
15		78996	1087206638	296706960		36189	484737865	522700638
16		64882	1067515364	312385441		35233	507159068	482999614
17		75563	847728140	332267126		21710	284387109	355460274
18		83816	844174596	351252620		34809	493912542	660936006
19		69894	881395797	232043373		43409	401076196	348237769
20		91961	937856897	226019131		26058	338905931	492996711
		ΔD3ΔG2(WT)
		-ATP				+ATP
			Raw intensity values				Raw intensity values
		DAPI area (pixels)	DAPI (overall)	hCAP-H2 (overal)		DAPI area (pixels)	DAPI (overall)	hCAP-H2 (overal)
Chromosome cluster
1		80196	1082193207	158690		106855	779870158	10570
2		102769	1262588969	974		78938	679449959	5380
3		89837	990392662	5205		77912	990968257	736
4		84190	1004551277	126948		87235	733469217	87730
5		95923	995572869	4074		88275	973568682	777
6		80632	974420655	983		86003	1009376749	356935
7		87256	1287495498	171470		113634	1158009993	182854
8		81091	1057278125	921		73999	444530437	436294
9		88396	1185812837	0		86294	457967876	141357
10		84199	1007446448	1005		101773	1100197365	165342
11		86552	985055800	560		85647	740668977	303457
12		83190	979870174	131581		132174	1262629771	907
13		96170	1062186464	1874		74589	846525232	112443
14		88225	1276753901	18679		112662	681235095	128042
15		89994	1076414368	174941		75039	620226152	578070
16		84802	1031206198	5215		67424	572051533	376640
17		110503	1034235669	324815		67705	386906528	91244
18		115520	1505178169	2045		85405	470538851	4054
19		98924	1502450517	663		84333	710936410	70175
20		83692	1117181450	216273		108561	592924681	201555
		holo(SMC-TR)
		-ATP				+ATP
			Raw intensity values				Raw intensity values
		DAPI area (pixels)	DAPI (overall)	hCAP-H2 (overal)		DAPI area (pixels)	DAPI (overall)	hCAP-H2 (overal)
Chromosome cluster
1		102707	881250976	185481823		75985	1020840895	168930661
2		76184	707494183	156331453		68517	814242472	148929630
3		110837	918760736	225548232		78626	731243657	115271403
4		72705	628631496	144705466		105691	873966628	133607733
5		86599	883680341	244890593		66915	678548948	112972851
6		110457	973630191	144984699		84117	796323097	152435792
7		92291	1092348106	194650893		74533	1074261551	163863281
8		69657	1022497510	189012779		52628	595456026	163778609
9		82058	1067552548	130583725		65575	729733754	147501013
10		107743	926683229	258438304		70953	810777747	133933601
11		95857	697620013	200814272		69434	861155513	102499495
12		88415	674071919	150180777		78682	815008523	175792148
13		123012	909094903	160875752		67015	839791777	100925804
14		83891	1103124252	195608675		79729	743422924	139917943
15		72598	975261294	222358321		83631	626834930	141906588
16		82329	982684331	139577268		89653	794940033	134268760
17		77963	1049729213	255063473		85454	640392489	78042781
18		98731	825338018	141679638		69587	813277551	110029727
19		95625	1106349457	199479286		87545	890888051	122174047
20		69698	890976648	149001295		96237	798501083	150794926
