# Supplementary figures and images for: Molecular dissection of condensin II-mediated chromosome assembly using in vitro assays
Source: eLife journal article supplement (doi:10.7554/elife.78984), 2022-08-19

Figure 1–figure supplement 1–source data 1

A

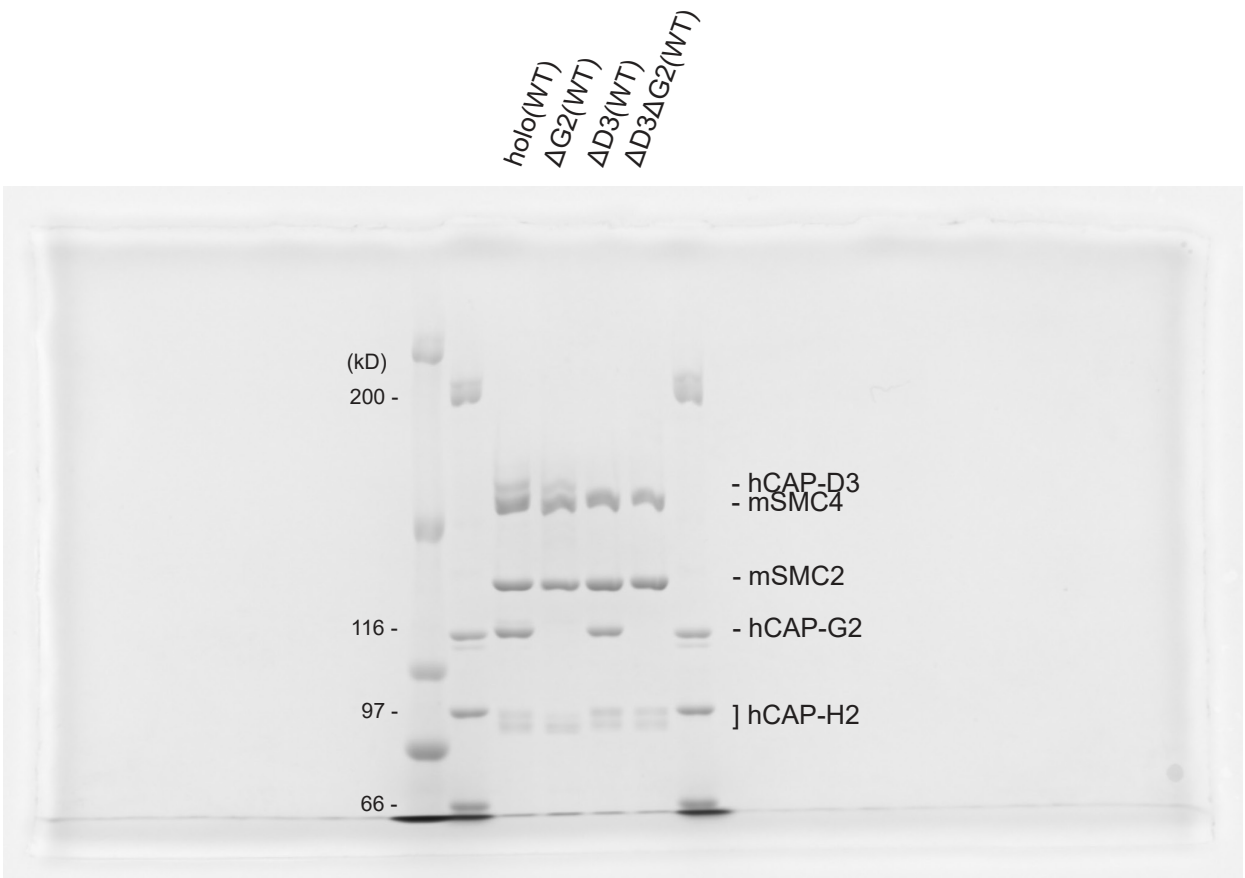

B

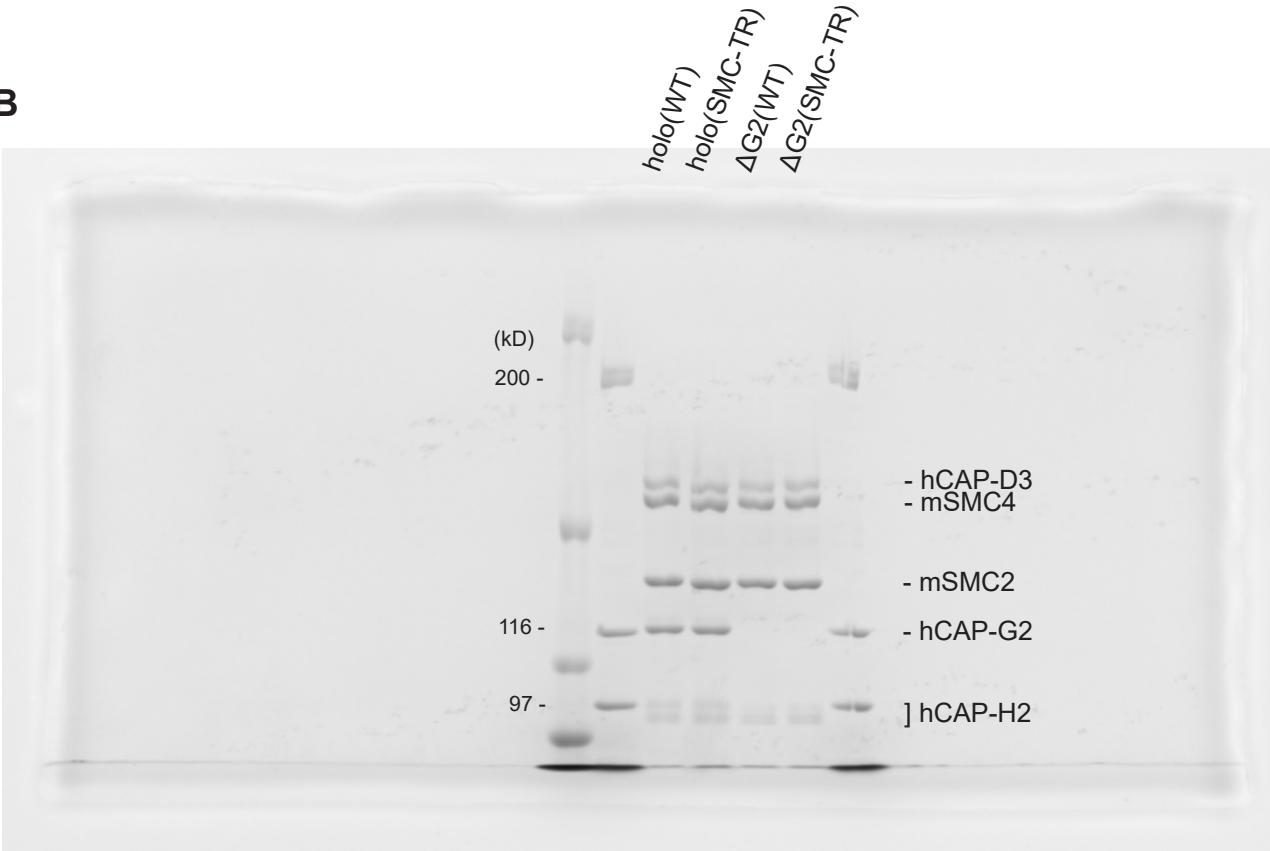

**C**

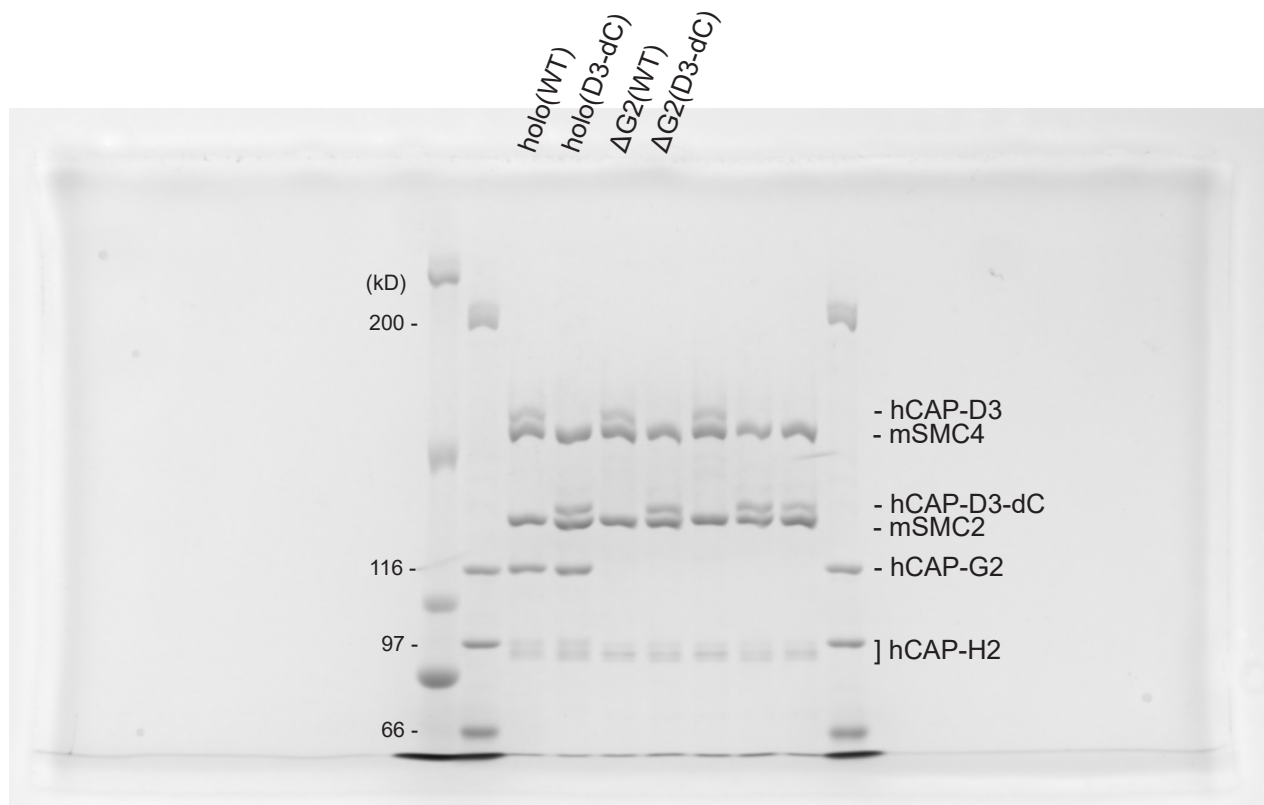

**D**

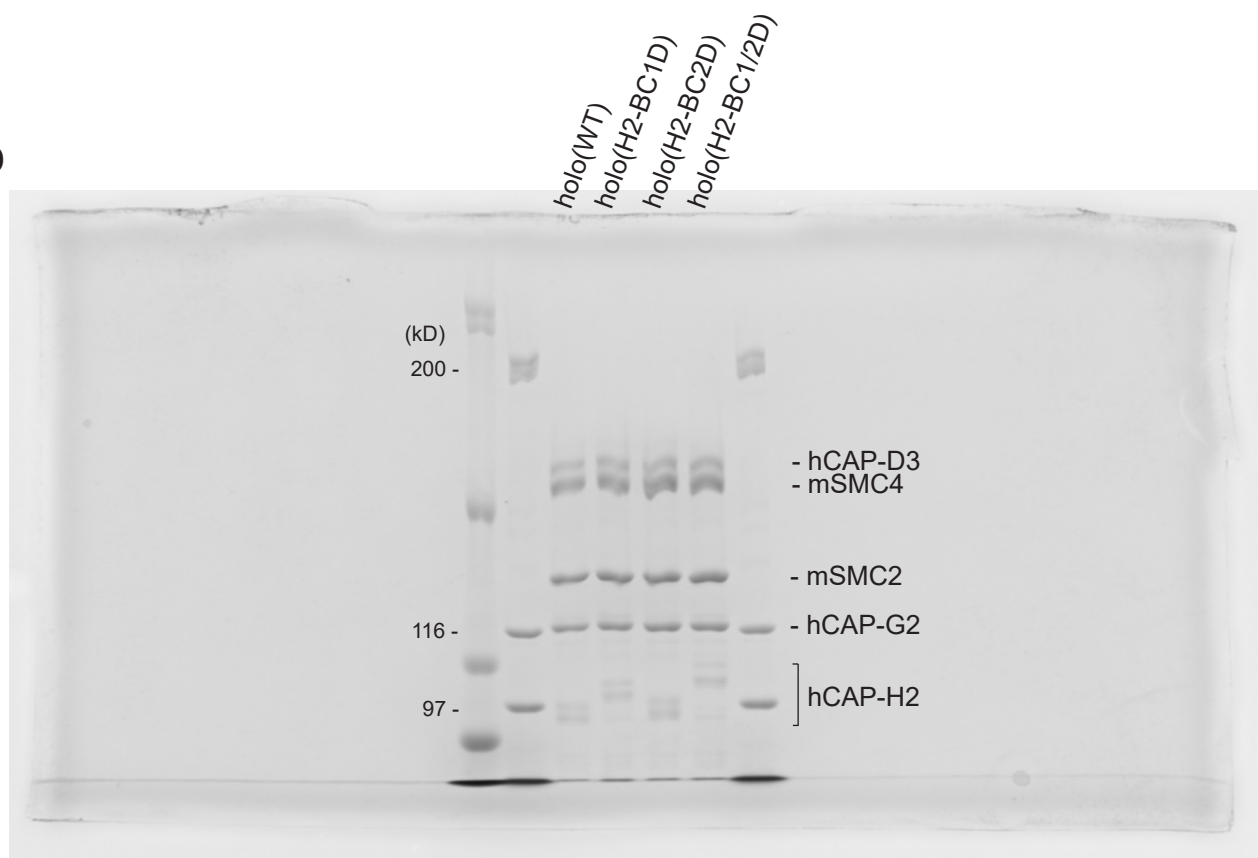

**E**

|           |   |   |   |   |   |   |
|-----------|---|---|---|---|---|---|
| holo(WT): | - | - | + | + | + | + |
| PPase:    | + | + | - | - | + | + |

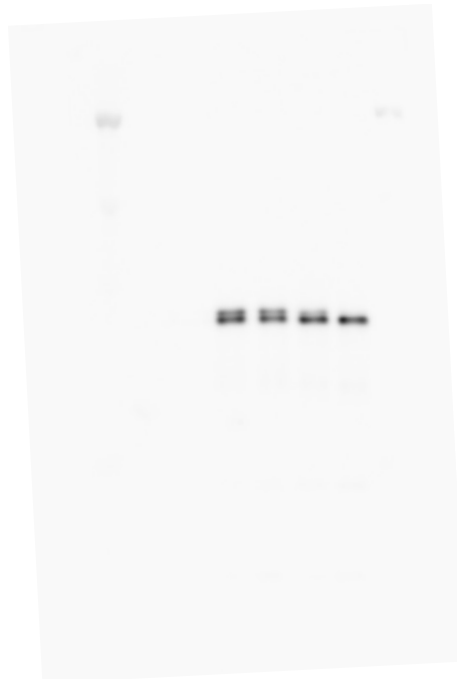

] hCAP-H2

Supplement: fig1-figsupp1-data1 [file elife-78984-fig1-figsupp1-data1-v2.zip]

Figure 2–figure supplement 1–source data 1

A

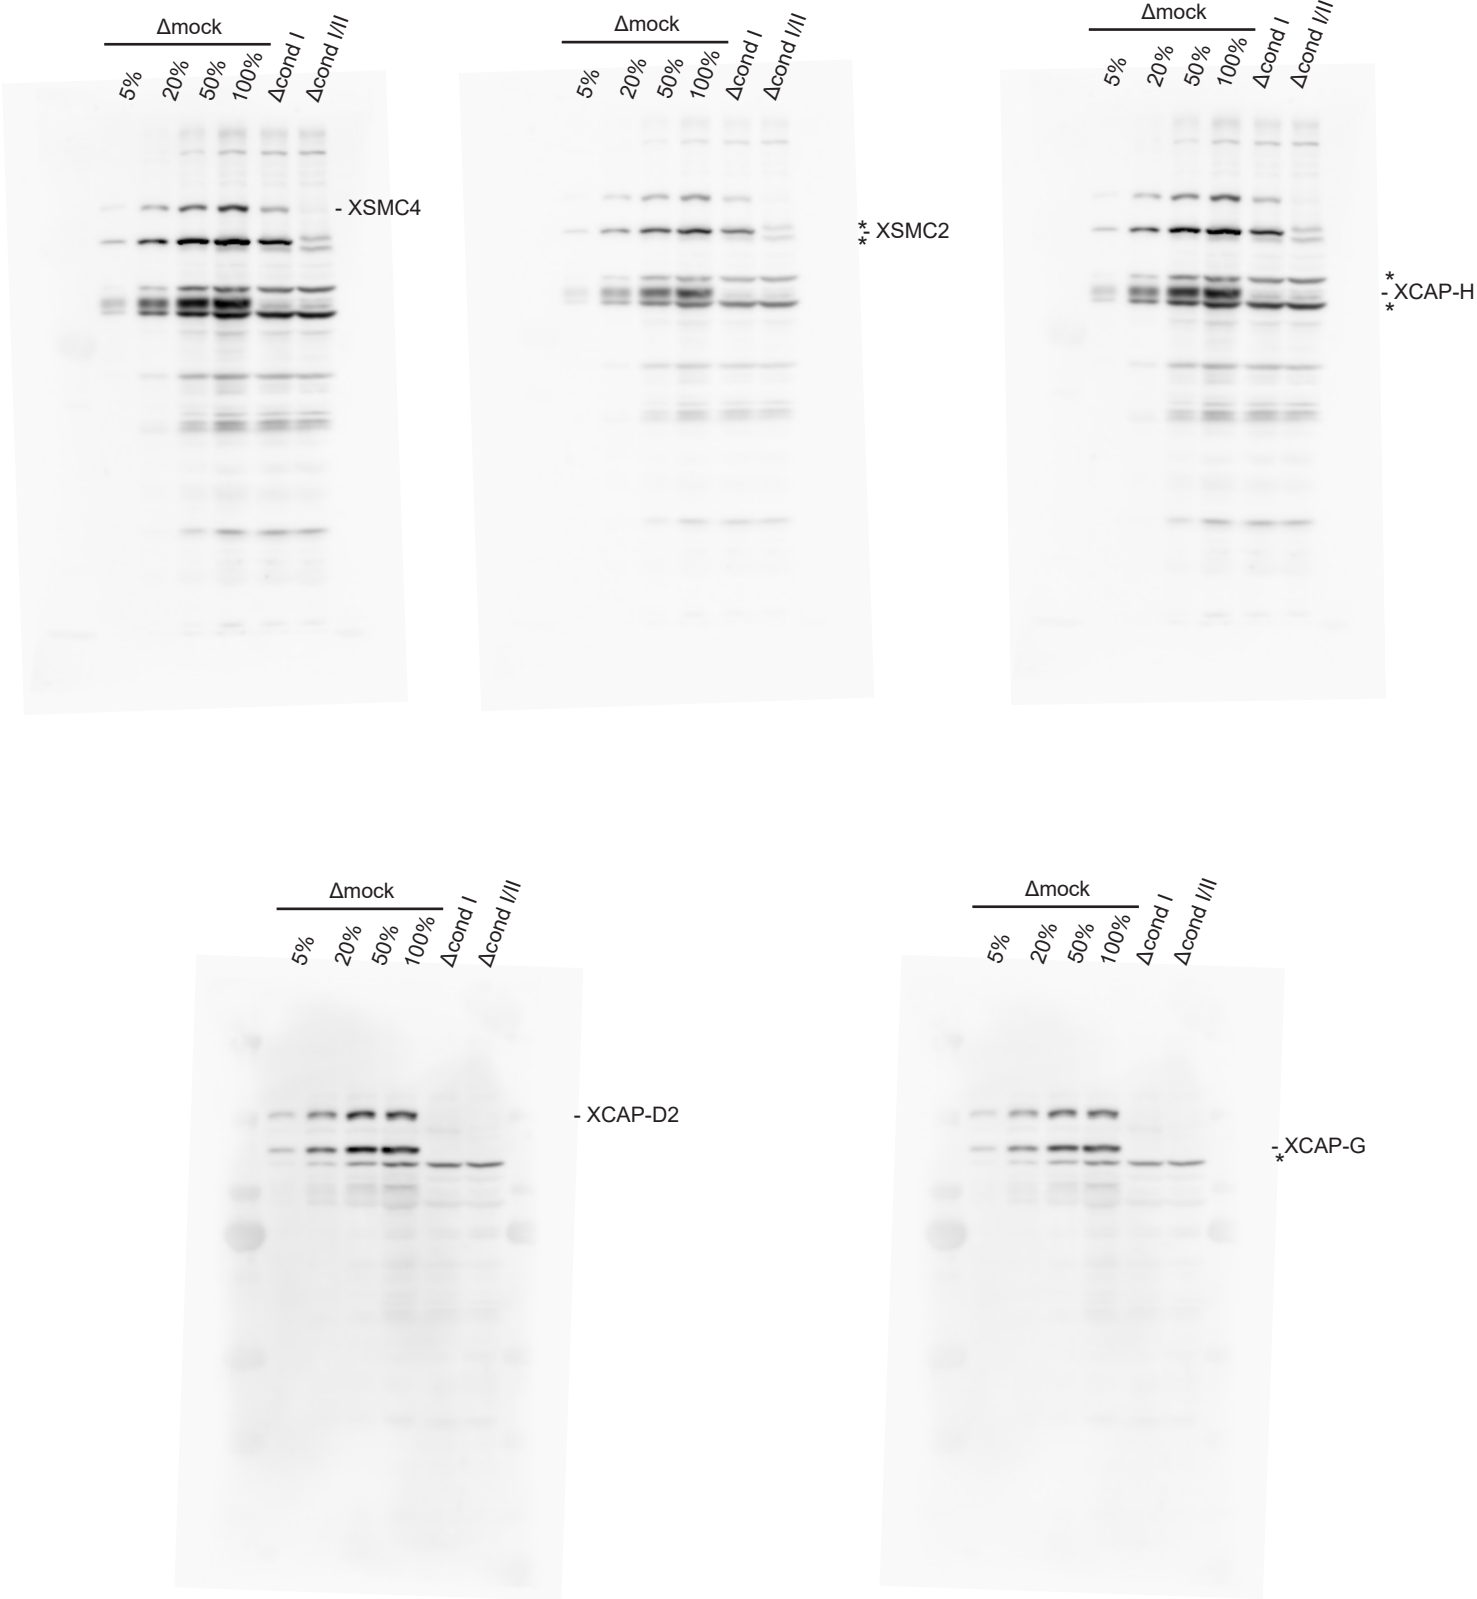

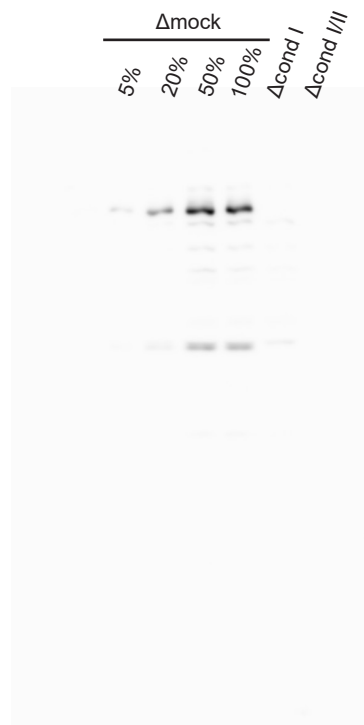

\* XCAP-D3

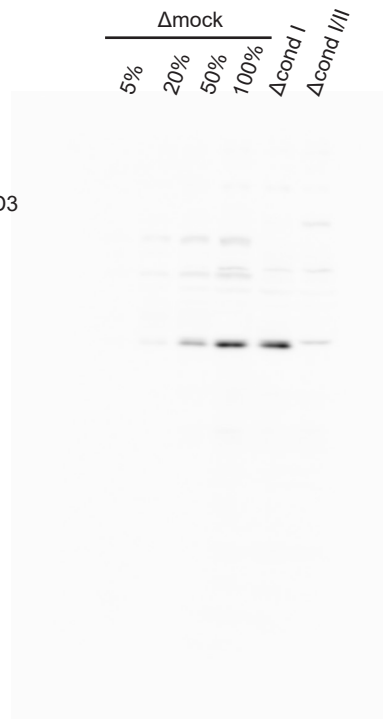

\* XCAP-H2  
(AfR201)

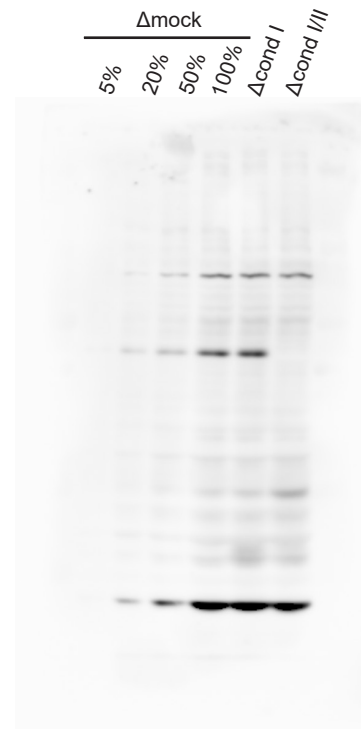

- XCAP-H2  
(AfR202)

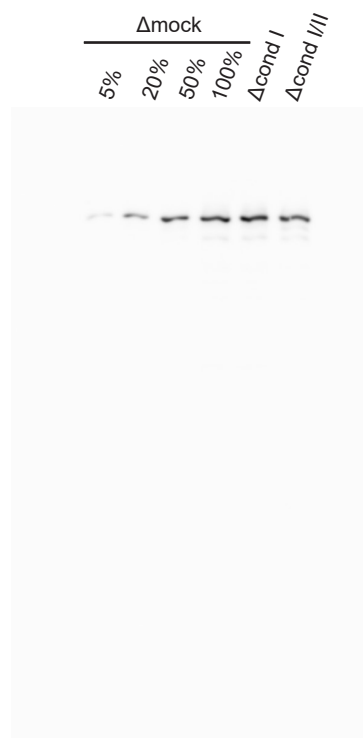

- Xtopo IIa

Supplement: fig2-figsupp1-data1 [file elife-78984-fig2-figsupp1-data1-v2.zip]

Figure 4–figure supplement 3B–source data 1

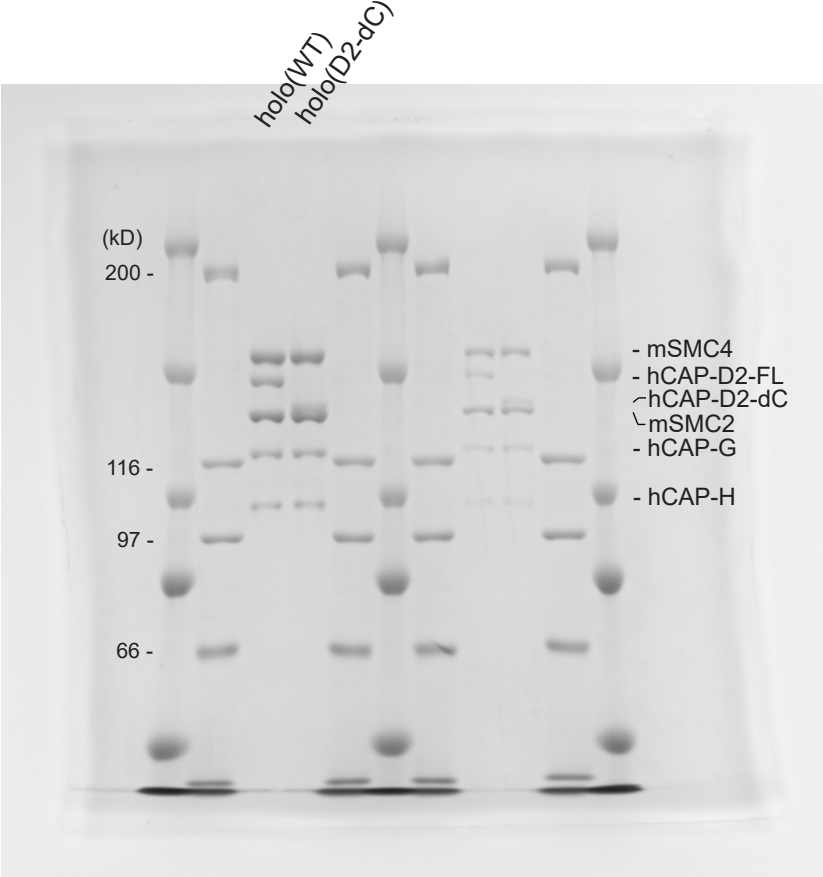

Supplement: fig4-figsupp3-data1 [file elife-78984-fig4-figsupp3-data1-v2.zip]

Figure 5–figure supplement 1–source data 1

A

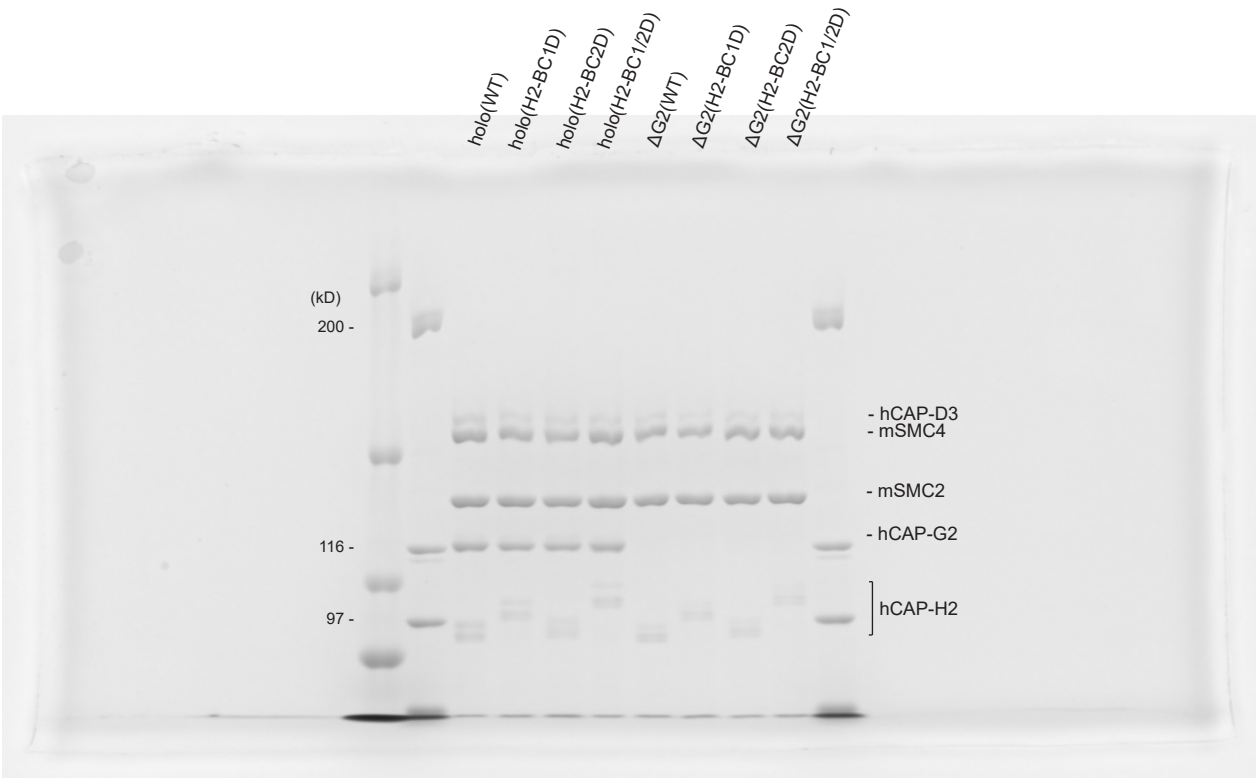

Supplement: supp [file Figure 5-figure supplement 1-source data 1.pdf › Source data_2/Figure 5-figure supplement 1-source data 1/Figure 5-figure supplement 1-source data 1.pdf]
